# Supplementary material for: Glucagon Resistance at the Level of Amino Acid Turnover in Obese Subjects With Hepatic Steatosis
Source: Oxford University Press journal article supplement (doi:10.2337/db19-0715), 2020-01-23
Supplement: db190715supplementarydata.xlsx [file db190715supplementarydata.xlsx]

## Sheet: Diff expression analysis
Ensembl acc key	Gene name	Description	Log2(Fold-change)	Raw p-value	Adjusted p-value
ENSG00000000003	TSPAN6	tetraspanin 6	-0.0433863	0.590468	0.879244
ENSG00000000005	TNMD	tenomodulin	0.749953	0.454867	0.813445
ENSG00000000419	DPM1	dolichyl-phosphate mannosyltransferase subunit 1, catalytic	-0.016798	0.853645	0.965796
ENSG00000000457	SCYL3	SCY1 like pseudokinase 3	0.0164281	0.887778	0.974581
ENSG00000000460	C1orf112	chromosome 1 open reading frame 112	0.211235	0.342185	0.749165
ENSG00000000938	FGR	FGR proto-oncogene, Src family tyrosine kinase	0.46288	0.00801973	0.143926
ENSG00000000971	CFH	complement factor H	0.08175	0.431183	0.802472
ENSG00000001036	FUCA2	alpha-L-fucosidase 2	-0.156602	0.0429707	0.343077
ENSG00000001084	GCLC	glutamate-cysteine ligase catalytic subunit	0.0399259	0.710595	0.923712
ENSG00000001167	NFYA	nuclear transcription factor Y subunit alpha	0.0953271	0.417797	0.795141
ENSG00000001460	STPG1	sperm tail PG-rich repeat containing 1	-0.0962346	0.571568	0.869028
ENSG00000001461	NIPAL3	NIPA like domain containing 3	0.0573437	0.572757	0.869698
ENSG00000001497	LAS1L	LAS1 like, ribosome biogenesis factor	-0.0600288	0.537926	0.851071
ENSG00000001561	ENPP4	ectonucleotide pyrophosphatase/phosphodiesterase 4	0.248088	0.21161	0.644106
ENSG00000001617	SEMA3F	semaphorin 3F	0.299314	0.0520771	0.375795
ENSG00000001626	CFTR	cystic fibrosis transmembrane conductance regulator	0.0778686	0.827185	0.960673
ENSG00000001629	ANKIB1	ankyrin repeat and IBR domain containing 1	0.125692	0.249213	0.679092
ENSG00000001630	CYP51A1	cytochrome P450 family 51 subfamily A member 1	0.284405	0.245297	0.675886
ENSG00000001631	KRIT1	KRIT1, ankyrin repeat containing	0.0920407	0.604045	0.885003
ENSG00000002016	RAD52	RAD52 homolog, DNA repair protein	-0.136862	0.603363	0.885003
ENSG00000002330	BAD	BCL2 associated agonist of cell death	0.0141009	0.912827	0.981741
ENSG00000002549	LAP3	leucine aminopeptidase 3	-0.0742457	0.373893	0.769479
ENSG00000002586	CD99	CD99 molecule (Xg blood group)	-0.0701041	0.464653	0.817845
ENSG00000002587	HS3ST1	heparan sulfate-glucosamine 3-sulfotransferase 1	-0.0844539	0.773872	0.943634
ENSG00000002726	AOC1	amine oxidase, copper containing 1	0.291884	0.748935	0.9366
ENSG00000002745	WNT16	Wnt family member 16	-0.0782668	0.979907
ENSG00000002746	HECW1	HECT, C2 and WW domain containing E3 ubiquitin protein ligase 1	-0.826069	0.300677
ENSG00000002822	MAD1L1	mitotic arrest deficient 1 like 1	-0.195678	0.106232	0.511121
ENSG00000002834	LASP1	LIM and SH3 protein 1	0.133928	0.260383	0.689154
ENSG00000002919	SNX11	sorting nexin 11	0.275484	0.00986882	0.160899
ENSG00000002933	TMEM176A	transmembrane protein 176A	-0.194086	0.227624	0.657882
ENSG00000003056	M6PR	mannose-6-phosphate receptor, cation dependent	0.0115976	0.891	0.974937
ENSG00000003096	KLHL13	kelch like family member 13	-0.30202	0.175675	0.6051
ENSG00000003137	CYP26B1	cytochrome P450 family 26 subfamily B member 1	-0.0791784	0.822671	0.959921
ENSG00000003147	ICA1	islet cell autoantigen 1	0.0896322	0.819494	0.958737
ENSG00000003249	DBNDD1	dysbindin domain containing 1	-0.0192516	0.931501	0.985403
ENSG00000003393	ALS2	ALS2, alsin Rho guanine nucleotide exchange factor	-0.0543598	0.641748	0.896348
ENSG00000003400	CASP10	caspase 10	0.16727	0.107986	0.514739
ENSG00000003402	CFLAR	CASP8 and FADD like apoptosis regulator	0.0801452	0.292746	0.713945
ENSG00000003436	TFPI	tissue factor pathway inhibitor	-0.181814	0.353052	0.756
ENSG00000003509	NDUFAF7	NADH:ubiquinone oxidoreductase complex assembly factor 7	-0.0998371	0.381265	0.775873
ENSG00000003756	RBM5	RNA binding motif protein 5	0.0924844	0.366191	0.765724
ENSG00000003987	MTMR7	myotubularin related protein 7	-0.39773	0.456803	0.813875
ENSG00000003989	SLC7A2	solute carrier family 7 member 2	-0.525081	0.00123898	0.0495452
ENSG00000004059	ARF5	ADP ribosylation factor 5	0.0246082	0.83483	0.962482
ENSG00000004139	SARM1	sterile alpha and TIR motif containing 1	0.290953	0.0387492	0.324211
ENSG00000004142	POLDIP2	DNA polymerase delta interacting protein 2	-0.0575498	0.55176	0.858321
ENSG00000004399	PLXND1	plexin D1	0.0224441	0.807547	0.954691
ENSG00000004455	AK2	adenylate kinase 2	0.0278663	0.728841	0.931127
ENSG00000004468	CD38	CD38 molecule	0.248203	0.0961485	0.491519
ENSG00000004478	FKBP4	FKBP prolyl isomerase 4	-0.0654901	0.641061	0.896186
ENSG00000004487	KDM1A	lysine demethylase 1A	-0.03943	0.55378	0.859281
ENSG00000004534	RBM6	RNA binding motif protein 6	-0.00585906	0.954014	0.989419
ENSG00000004660	CAMKK1	calcium/calmodulin dependent protein kinase kinase 1	0.20868	0.422959	0.797329
ENSG00000004700	RECQL	RecQ like helicase	0.102574	0.381876	0.776437
ENSG00000004766	VPS50	VPS50, EARP/GARPII complex subunit	-0.107087	0.277394	0.700563
ENSG00000004776	HSPB6	heat shock protein family B (small) member 6	-0.161126	0.368979	0.766439
ENSG00000004777	ARHGAP33	Rho GTPase activating protein 33	0.325019	0.530331	0.847219
ENSG00000004779	NDUFAB1	NADH:ubiquinone oxidoreductase subunit AB1	0.00935428	0.905455	0.97934
ENSG00000004799	PDK4	pyruvate dehydrogenase kinase 4	-0.00965118	0.960806	0.99129
ENSG00000004809	SLC22A16	solute carrier family 22 member 16	0.893904	0.591183
ENSG00000004838	ZMYND10	zinc finger MYND-type containing 10	-0.650545	0.421448
ENSG00000004846	ABCB5	ATP binding cassette subfamily B member 5	-0.0397948	0.989783
ENSG00000004848	ARX	aristaless related homeobox	0.191032	0.950983
ENSG00000004864	SLC25A13	solute carrier family 25 member 13	0.0770015	0.363099	0.763553
ENSG00000004866	ST7	suppression of tumorigenicity 7	-0.177614	0.0110174	0.171777
ENSG00000004897	CDC27	cell division cycle 27	0.165276	0.0780907	0.44757
ENSG00000004939	SLC4A1	solute carrier family 4 member 1 (Diego blood group)	1.73401	0.00823884
ENSG00000004948	CALCR	calcitonin receptor	0.0877963	0.914265
ENSG00000004961	HCCS	holocytochrome c synthase	0.00290072	0.971614	0.995007
ENSG00000004975	DVL2	dishevelled segment polarity protein 2	-0.0308182	0.789357	0.949479
ENSG00000005001	PRSS22	serine protease 22	-0.64658	0.528888
ENSG00000005007	UPF1	UPF1, RNA helicase and ATPase	0.0146449	0.847752	0.96515
ENSG00000005020	SKAP2	src kinase associated phosphoprotein 2	0.181371	0.238837	0.669528
ENSG00000005022	SLC25A5	solute carrier family 25 member 5	-0.0624835	0.445767	0.808596
ENSG00000005059	MCUB	mitochondrial calcium uniporter dominant negative beta subunit	-0.0722721	0.75505	0.938333
ENSG00000005073	HOXA11	homeobox A11
ENSG00000005075	POLR2J	RNA polymerase II subunit J	0.0509478	0.699922	0.920114
ENSG00000005100	DHX33	DEAH-box helicase 33	0.211169	0.0229767	0.255936
ENSG00000005102	MEOX1	mesenchyme homeobox 1	1.52943	0.120848
ENSG00000005108	THSD7A	thrombospondin type 1 domain containing 7A	0.528398	0.00567971	0.120282
ENSG00000005156	LIG3	DNA ligase 3	-0.047073	0.539389	0.852084
ENSG00000005175	RPAP3	RNA polymerase II associated protein 3	0.0932306	0.461339	0.815436
ENSG00000005187	ACSM3	acyl-CoA synthetase medium chain family member 3	-0.246088	0.0760591	0.441586
ENSG00000005189	REXO5	RNA exonuclease 5	-0.202903	0.422712	0.797329
ENSG00000005194	CIAPIN1	cytokine induced apoptosis inhibitor 1	0.0457228	0.636775	0.894989
ENSG00000005206	SPPL2B	signal peptide peptidase like 2B	0.0818515	0.530285	0.847219
ENSG00000005238	FAM214B	family with sequence similarity 214 member B	0.224789	0.0989772	0.497622
ENSG00000005243	COPZ2	coatomer protein complex subunit zeta 2	0.0454992	0.635531	0.894989
ENSG00000005249	PRKAR2B	protein kinase cAMP-dependent type II regulatory subunit beta	-0.00546512	0.970466	0.994898
ENSG00000005302	MSL3	MSL complex subunit 3	0.0791245	0.351587	0.754885
ENSG00000005339	CREBBP	CREB binding protein	-0.0910895	0.354174	0.756
ENSG00000005379	TSPOAP1	TSPO associated protein 1	-0.269514	0.193954	0.626545
ENSG00000005381	MPO	myeloperoxidase	0.308373	0.538299	0.851275
ENSG00000005421	PON1	paraoxonase 1	-0.256278	0.00439798	0.103855
ENSG00000005436	GCFC2	GC-rich sequence DNA-binding factor 2	-0.00516646	0.971824	0.995007
ENSG00000005448	WDR54	WD repeat domain 54	-0.040295	0.867139	0.969846
ENSG00000005469	CROT	carnitine O-octanoyltransferase	-0.141439	0.219212	0.649874
ENSG00000005471	ABCB4	ATP binding cassette subfamily B member 4	0.301592	0.0620676	0.40537
ENSG00000005483	KMT2E	lysine methyltransferase 2E	0.165111	0.245231	0.675838
ENSG00000005486	RHBDD2	rhomboid domain containing 2	-0.0411907	0.788076	0.949146
ENSG00000005513	SOX8	SRY-box 8	-0.33782	0.722988
ENSG00000005700	IBTK	inhibitor of Bruton tyrosine kinase	0.274082	0.0237374	0.260235
ENSG00000005801	ZNF195	zinc finger protein 195	0.028429	0.839417	0.963263
ENSG00000005810	MYCBP2	MYC binding protein 2, E3 ubiquitin protein ligase	0.283723	0.0854973	0.465184
ENSG00000005812	FBXL3	F-box and leucine rich repeat protein 3	-0.0929446	0.462259	0.815731
ENSG00000005844	ITGAL	integrin subunit alpha L	-0.169391	0.199244	0.631926
ENSG00000005882	PDK2	pyruvate dehydrogenase kinase 2	-0.314314	0.00675436	0.131026
ENSG00000005884	ITGA3	integrin subunit alpha 3	-0.16608	0.48596	0.827601
ENSG00000005889	ZFX	zinc finger protein X-linked	0.13268	0.460242	0.815436
ENSG00000005893	LAMP2	lysosomal associated membrane protein 2	-0.0817437	0.350071	0.753528
ENSG00000005961	ITGA2B	integrin subunit alpha 2b	0.579115	0.238749	0.669528
ENSG00000005981	ASB4	ankyrin repeat and SOCS box containing 4	-0.269702	0.239865	0.670828
ENSG00000006007	GDE1	glycerophosphodiester phosphodiesterase 1	0.048987	0.453649	0.813184
ENSG00000006015	REX1BD	required for excision 1-B domain containing	-0.0575098	0.657171	0.903435
ENSG00000006016	CRLF1	cytokine receptor like factor 1	-1.57445	0.29298
ENSG00000006025	AC003665.1	oxysterol binding protein like 7	0.43463	0.108734	0.515941
ENSG00000006042	TMEM98	transmembrane protein 98	0.11956	0.525286	0.845351
ENSG00000006047	YBX2	Y-box binding protein 2	-0.394988	0.118676	0.529657
ENSG00000006059	KRT33A	keratin 33A
ENSG00000006062	MAP3K14	mitogen-activated protein kinase kinase kinase 14	0.0288979	0.817606	0.95782
ENSG00000006071	ABCC8	ATP binding cassette subfamily C member 8	0.0568836	0.968635
ENSG00000006116	CACNG3	calcium voltage-gated channel auxiliary subunit gamma 3	-0.116739	0.970034
ENSG00000006118	TMEM132A	transmembrane protein 132A	0.0242547	0.941577	0.987128
ENSG00000006125	AP2B1	adaptor related protein complex 2 subunit beta 1	-0.0624038	0.328032	0.739343
ENSG00000006128	TAC1	tachykinin precursor 1
ENSG00000006194	ZNF263	zinc finger protein 263	0.0614861	0.425181	0.798362
ENSG00000006210	CX3CL1	C-X3-C motif chemokine ligand 1	-0.092841	0.372957	0.769154
ENSG00000006282	SPATA20	spermatogenesis associated 20	-0.26434	0.405143	0.788777
ENSG00000006283	CACNA1G	calcium voltage-gated channel subunit alpha1 G	-0.116739	0.970034
ENSG00000006327	TNFRSF12A	TNF receptor superfamily member 12A	0.327446	0.273348	0.696013
ENSG00000006377	DLX6	distal-less homeobox 6	0.229504	0.941128
ENSG00000006432	MAP3K9	mitogen-activated protein kinase kinase kinase 9	-0.0849841	0.555714	0.860287
ENSG00000006451	RALA	RAS like proto-oncogene A	-0.00313421	0.961645	0.99141
ENSG00000006453	BAIAP2L1	BAI1 associated protein 2 like 1	-0.344474	0.00828117	0.146691
ENSG00000006459	KDM7A	lysine demethylase 7A	0.0306706	0.805389	0.953675
ENSG00000006468	ETV1	ETS variant 1	0.332616	0.116151	0.526104
ENSG00000006530	AGK	acylglycerol kinase	-0.0300075	0.753478	0.937729
ENSG00000006534	ALDH3B1	aldehyde dehydrogenase 3 family member B1	0.148659	0.343732	0.750133
ENSG00000006555	TTC22	tetratricopeptide repeat domain 22	-0.146539	0.373888	0.769479
ENSG00000006576	PHTF2	putative homeodomain transcription factor 2	0.0147851	0.934784	0.985403
ENSG00000006606	CCL26	C-C motif chemokine ligand 26	0.276278	0.89429
ENSG00000006607	FARP2	FERM, ARH/RhoGEF and pleckstrin domain protein 2	0.0378054	0.721517	0.928406
ENSG00000006611	USH1C	USH1 protein network component harmonin	-0.939791	0.00140046	0.0534013
ENSG00000006625	GGCT	gamma-glutamylcyclotransferase	0.0287371	0.816417	0.957515
ENSG00000006634	DBF4	DBF4 zinc finger	-0.130129	0.584191	0.876476
ENSG00000006638	TBXA2R	thromboxane A2 receptor	-0.0813867	0.634526	0.894989
ENSG00000006652	IFRD1	interferon related developmental regulator 1	0.211277	0.504612	0.835693
ENSG00000006659	LGALS14	galectin 14
ENSG00000006695	COX10	cytochrome c oxidase assembly factor heme A:farnesyltransferase COX10	-0.0797638	0.462049	0.815676
ENSG00000006704	GTF2IRD1	GTF2I repeat domain containing 1	-0.389686	0.0209116	0.243811
ENSG00000006712	PAF1	PAF1 homolog, Paf1/RNA polymerase II complex component	0.103066	0.304722	0.72276
ENSG00000006715	VPS41	VPS41, HOPS complex subunit	0.23157	0.0279068	0.278408
ENSG00000006740	ARHGAP44	Rho GTPase activating protein 44	-0.454474	0.0217946	0.248502
ENSG00000006744	ELAC2	elaC ribonuclease Z 2	0.109544	0.217367	0.649308
ENSG00000006747	SCIN	scinderin	-0.0338327	0.975504
ENSG00000006756	ARSD	arylsulfatase D	-0.117519	0.15267	0.576945
ENSG00000006757	PNPLA4	patatin like phospholipase domain containing 4	0.0166728	0.838862	0.963263
ENSG00000006788	MYH13	myosin heavy chain 13
ENSG00000006831	ADIPOR2	adiponectin receptor 2	0.112681	0.128262	0.54342
ENSG00000006837	CDKL3	cyclin dependent kinase like 3	-0.503876	0.44396
ENSG00000007001	UPP2	uridine phosphorylase 2	-0.534015	0.209217	0.641708
ENSG00000007038	PRSS21	serine protease 21	-1.1126	0.275281
ENSG00000007047	MARK4	microtubule affinity regulating kinase 4	0.290951	0.0201861	0.239199
ENSG00000007062	PROM1	prominin 1	-0.497263	0.0458349	0.355161
ENSG00000007080	CCDC124	coiled-coil domain containing 124	-0.0567285	0.636924	0.894989
ENSG00000007129	CEACAM21	carcinoembryonic antigen related cell adhesion molecule 21	-0.113166	0.591704	0.879244
ENSG00000007168	PAFAH1B1	platelet activating factor acetylhydrolase 1b regulatory subunit 1	0.115408	0.136781	0.553635
ENSG00000007171	NOS2	nitric oxide synthase 2	0.303253	0.525886	0.845726
ENSG00000007174	DNAH9	dynein axonemal heavy chain 9	0.920488	0.578542
ENSG00000007202	KIAA0100	KIAA0100	0.11528	0.204857	0.638395
ENSG00000007216	SLC13A2	solute carrier family 13 member 2	0.2619	0.368678	0.766439
ENSG00000007237	GAS7	growth arrest specific 7	0.304867	0.0870694	0.468777
ENSG00000007255	TRAPPC6A	trafficking protein particle complex 6A	-0.0142705	0.921006	0.982861
ENSG00000007264	MATK	megakaryocyte-associated tyrosine kinase	0.309373	0.131707	0.548444
ENSG00000007306	CEACAM7	carcinoembryonic antigen related cell adhesion molecule 7	3.797e-05
ENSG00000007312	CD79B	CD79b molecule	0.0842378	0.648196	0.899704
ENSG00000007314	SCN4A	sodium voltage-gated channel alpha subunit 4	-0.195227	0.558572	0.861469
ENSG00000007341	ST7L	suppression of tumorigenicity 7 like	-0.0745075	0.588916	0.878652
ENSG00000007350	TKTL1	transketolase like 1	-0.0126463	0.984004
ENSG00000007372	PAX6	paired box 6
ENSG00000007376	RPUSD1	RNA pseudouridine synthase domain containing 1	0.11138	0.487971	0.828175
ENSG00000007384	RHBDF1	rhomboid 5 homolog 1	0.137042	0.467441	0.819342
ENSG00000007392	LUC7L	LUC7 like	0.0614511	0.711999	0.923846
ENSG00000007402	CACNA2D2	calcium voltage-gated channel auxiliary subunit alpha2delta 2	-0.0396211	0.883226	0.973776
ENSG00000007516	BAIAP3	BAI1 associated protein 3	-0.277946	0.0233221	0.257707
ENSG00000007520	TSR3	TSR3, acp transferase ribosome maturation factor	-0.0603363	0.626888	0.892752
ENSG00000007541	PIGQ	phosphatidylinositol glycan anchor biosynthesis class Q	-0.0188714	0.897728	0.977334
ENSG00000007545	CRAMP1	cramped chromatin regulator homolog 1	-0.11606	0.374269	0.769479
ENSG00000007866	TEAD3	TEA domain transcription factor 3	0.00117684	0.990479	0.998487
ENSG00000007908	SELE	selectin E	0.257139	0.595823	0.881325
ENSG00000007923	DNAJC11	DnaJ heat shock protein family (Hsp40) member C11	0.0315389	0.690169	0.915502
ENSG00000007933	FMO3	flavin containing monooxygenase 3	-0.0661023	0.607187	0.885802
ENSG00000007944	MYLIP	myosin regulatory light chain interacting protein	0.0877286	0.512188	0.839786
ENSG00000007952	NOX1	NADPH oxidase 1
ENSG00000007968	E2F2	E2F transcription factor 2	0.060333	0.912589
ENSG00000008018	PSMB1	proteasome subunit beta 1	-0.0378075	0.661266	0.904656
ENSG00000008056	SYN1	synapsin I	0.303011	0.299447	0.718896
ENSG00000008083	JARID2	jumonji and AT-rich interaction domain containing 2	0.067335	0.426511	0.799044
ENSG00000008086	CDKL5	cyclin dependent kinase like 5	0.392148	0.010903	0.170654
ENSG00000008118	CAMK1G	calcium/calmodulin dependent protein kinase IG	0.0593538	0.919428	0.982201
ENSG00000008128	CDK11A	cyclin dependent kinase 11A	0.145294	0.737979	0.933324
ENSG00000008130	NADK	NAD kinase	0.0867157	0.465578	0.818394
ENSG00000008196	TFAP2B	transcription factor AP-2 beta	-0.746558	0.810069
ENSG00000008197	TFAP2D	transcription factor AP-2 delta
ENSG00000008226	DLEC1	DLEC1, cilia and flagella associated protein	-0.0577943	0.8466	0.96482
ENSG00000008256	CYTH3	cytohesin 3	-0.0690579	0.517992	0.842258
ENSG00000008277	ADAM22	ADAM metallopeptidase domain 22	1.38761	0.000915485	0.0408195
ENSG00000008282	SYPL1	synaptophysin like 1	-0.0589683	0.435487	0.803389
ENSG00000008283	CYB561	cytochrome b561	0.505521	0.00092449	0.0410897
ENSG00000008294	SPAG9	sperm associated antigen 9	0.00585236	0.96295	0.991583
ENSG00000008300	CELSR3	cadherin EGF LAG seven-pass G-type receptor 3	-0.2894	0.573483
ENSG00000008311	AASS	aminoadipate-semialdehyde synthase	-0.506542	0.00332769	0.0881239
ENSG00000008323	PLEKHG6	pleckstrin homology and RhoGEF domain containing G6	0.168776	0.342156	0.749165
ENSG00000008324	SS18L2	SS18 like 2	-0.20164	0.0567726	0.390882
ENSG00000008382	MPND	MPN domain containing	0.0140583	0.907663	0.979558
ENSG00000008394	MGST1	microsomal glutathione S-transferase 1	-0.13176	0.184055	0.615372
ENSG00000008405	CRY1	cryptochrome circadian regulator 1	0.151024	0.41112	0.791832
ENSG00000008438	PGLYRP1	peptidoglycan recognition protein 1	0.505634	0.554207
ENSG00000008441	NFIX	nuclear factor I X	0.0142497	0.863956	0.96936
ENSG00000008513	ST3GAL1	ST3 beta-galactoside alpha-2,3-sialyltransferase 1	-0.408674	0.000319712	0.0199192
ENSG00000008516	MMP25	matrix metallopeptidase 25	0.167141	0.633862	0.894547
ENSG00000008517	IL32	interleukin 32	0.299168	0.48597	0.827601
ENSG00000008710	PKD1	polycystin 1, transient receptor potential channel interacting	-0.0500893	0.758537	0.940464
ENSG00000008735	MAPK8IP2	mitogen-activated protein kinase 8 interacting protein 2	0.318258	0.527418	0.846263
ENSG00000008838	MED24	mediator complex subunit 24	-0.0888689	0.38669	0.779363
ENSG00000008853	RHOBTB2	Rho related BTB domain containing 2	0.141145	0.290899	0.711744
ENSG00000008869	HEATR5B	HEAT repeat containing 5B	0.0760646	0.497743	0.83379
ENSG00000008952	SEC62	SEC62 homolog, preprotein translocation factor	-0.0883089	0.25541	0.683771
ENSG00000008988	RPS20	ribosomal protein S20	-0.079748	0.388377	0.780544
ENSG00000009307	CSDE1	cold shock domain containing E1	-0.200617	0.000471066	0.0271661
ENSG00000009335	UBE3C	ubiquitin protein ligase E3C	0.0672304	0.180963	0.61178
ENSG00000009413	REV3L	REV3 like, DNA directed polymerase zeta catalytic subunit	0.229061	0.23848	0.669259
ENSG00000009694	TENM1	teneurin transmembrane protein 1	0.642131	0.236455	0.666929
ENSG00000009709	PAX7	paired box 7
ENSG00000009724	MASP2	mannan binding lectin serine peptidase 2	-0.223528	0.0429966	0.343088
ENSG00000009765	IYD	iodotyrosine deiodinase	-0.0465477	0.780024	0.945787
ENSG00000009780	FAM76A	family with sequence similarity 76 member A	-0.0181006	0.863404	0.969168
ENSG00000009790	TRAF3IP3	TRAF3 interacting protein 3	0.394939	0.0322958	0.29849
ENSG00000009830	POMT2	protein O-mannosyltransferase 2	0.0703156	0.577146	0.873003
ENSG00000009844	VTA1	vesicle trafficking 1	0.0438696	0.536445	0.850434
ENSG00000009950	MLXIPL	MLX interacting protein like	-0.183259	0.0416211	0.338499
ENSG00000009954	BAZ1B	bromodomain adjacent to zinc finger domain 1B	0.0215312	0.724165	0.928919
ENSG00000010017	RANBP9	RAN binding protein 9	-0.0484304	0.585364	0.876828
ENSG00000010030	ETV7	ETS variant 7	0.701826	0.0338992	0.304634
ENSG00000010072	SPRTN	SprT-like N-terminal domain	-0.121887	0.419515	0.795757
ENSG00000010165	EEF1AKNMT	eEF1A lysine and N-terminal methyltransferase	-0.0213138	0.81025	0.955409
ENSG00000010219	DYRK4	dual specificity tyrosine phosphorylation regulated kinase 4	-0.114052	0.379046	0.773184
ENSG00000010244	ZNF207	zinc finger protein 207	0.137182	0.0996673	0.498015
ENSG00000010256	UQCRC1	ubiquinol-cytochrome c reductase core protein 1	-0.161644	0.169581	0.598903
ENSG00000010270	STARD3NL	STARD3 N-terminal like	0.0684286	0.491105	0.830167
ENSG00000010278	CD9	CD9 molecule	-0.424761	0.0110284	0.171777
ENSG00000010282	HHATL	hedgehog acyltransferase like	-0.42451	0.891345
ENSG00000010292	NCAPD2	non-SMC condensin I complex subunit D2	0.0490337	0.535427	0.84979
ENSG00000010295	IFFO1	intermediate filament family orphan 1	0.0372762	0.730231	0.931439
ENSG00000010310	GIPR	gastric inhibitory polypeptide receptor	-0.299005	0.809707
ENSG00000010318	PHF7	PHD finger protein 7	-0.285749	0.128656	0.54355
ENSG00000010319	SEMA3G	semaphorin 3G	-0.288646	0.315585	0.729128
ENSG00000010322	NISCH	nischarin	0.0659692	0.430586	0.80241
ENSG00000010327	STAB1	stabilin 1	-0.0201612	0.889121	0.974701
ENSG00000010361	FUZ	fuzzy planar cell polarity protein	-0.489311	0.0013892	0.053117
ENSG00000010379	SLC6A13	solute carrier family 6 member 13	-0.390973	0.000741352	0.0363028
ENSG00000010404	IDS	iduronate 2-sulfatase	-0.0774876	0.450867	0.811938
ENSG00000010438	PRSS3	serine protease 3	-0.255324	0.399124	0.784531
ENSG00000010539	ZNF200	zinc finger protein 200	0.166526	0.294281	0.714881
ENSG00000010610	CD4	CD4 molecule	-0.543553	0.000528854	0.0294051
ENSG00000010626	LRRC23	leucine rich repeat containing 23	0.0448101	0.83007	0.961381
ENSG00000010671	BTK	Bruton tyrosine kinase	0.141528	0.433858	0.802896
ENSG00000010704	HFE	homeostatic iron regulator	0.0776983	0.439273	0.804632
ENSG00000010803	SCMH1	Scm polycomb group protein homolog 1	0.0803069	0.480841	0.825345
ENSG00000010810	FYN	FYN proto-oncogene, Src family tyrosine kinase	-0.167951	0.0419531	0.339449
ENSG00000010818	HIVEP2	human immunodeficiency virus type I enhancer binding protein 2	0.360864	0.00305942	0.0836919
ENSG00000010932	FMO1	flavin containing monooxygenase 1	0.803939	0.220423	0.649992
ENSG00000011007	ELOA	elongin A	-0.0763945	0.323158	0.734048
ENSG00000011009	LYPLA2	lysophospholipase 2	0.077764	0.534091	0.849118
ENSG00000011021	CLCN6	chloride voltage-gated channel 6	-0.174464	0.0861798	0.467078
ENSG00000011028	AC080038.1	mannose receptor C type 2	0.139268	0.296298	0.715783
ENSG00000011052	NME1-NME2	NME1-NME2 readthrough
ENSG00000011083	SLC6A7	solute carrier family 6 member 7	0.0697452	0.982093
ENSG00000011105	TSPAN9	tetraspanin 9	0.0960993	0.298978	0.718536
ENSG00000011114	BTBD7	BTB domain containing 7	0.106961	0.336443	0.744872
ENSG00000011132	APBA3	amyloid beta precursor protein binding family A member 3	-0.0821712	0.565537	0.865893
ENSG00000011143	MKS1	Meckel syndrome, type 1	-0.082547	0.475416	0.822372
ENSG00000011198	ABHD5	abhydrolase domain containing 5	-0.118922	0.335872	0.744652
ENSG00000011201	ANOS1	anosmin 1	0.384209	0.414798	0.793763
ENSG00000011243	AKAP8L	A-kinase anchoring protein 8 like	-0.0364634	0.816823	0.957626
ENSG00000011258	MBTD1	mbt domain containing 1	-0.0883958	0.624747	0.891117
ENSG00000011260	UTP18	UTP18, small subunit processome component	-0.0282391	0.703279	0.921715
ENSG00000011275	RNF216	ring finger protein 216	-0.101158	0.176025	0.605339
ENSG00000011295	TTC19	tetratricopeptide repeat domain 19	0.158139	0.0746727	0.437939
ENSG00000011304	PTBP1	polypyrimidine tract binding protein 1	-0.110761	0.14922	0.571026
ENSG00000011332	DPF1	double PHD fingers 1	0.498804	0.872479
ENSG00000011347	SYT7	synaptotagmin 7	1.07683	7.13985e-05	0.00741971
ENSG00000011376	LARS2	leucyl-tRNA synthetase 2, mitochondrial	-0.0116625	0.887669	0.974581
ENSG00000011405	PIK3C2A	phosphatidylinositol-4-phosphate 3-kinase catalytic subunit type 2 alpha	0.219602	0.145481	0.567541
ENSG00000011422	PLAUR	plasminogen activator, urokinase receptor	0.431887	0.112593	0.519904
ENSG00000011426	ANLN	anillin actin binding protein	-0.0752982	0.863129	0.969016
ENSG00000011451	WIZ	WIZ zinc finger	0.00027979	0.997068	0.998819
ENSG00000011454	RABGAP1	RAB GTPase activating protein 1	-0.00252484	0.971314	0.994898
ENSG00000011465	DCN	decorin	-0.117047	0.353899	0.756
ENSG00000011478	QPCTL	glutaminyl-peptide cyclotransferase like	-0.191884	0.170344	0.59937
ENSG00000011485	PPP5C	protein phosphatase 5 catalytic subunit	0.00347772	0.957212	0.990425
ENSG00000011523	CEP68	centrosomal protein 68	0.013007	0.904279	0.979028
ENSG00000011566	MAP4K3	mitogen-activated protein kinase kinase kinase kinase 3	-0.109311	0.482855	0.825806
ENSG00000011590	ZBTB32	zinc finger and BTB domain containing 32	0.421868	0.855515
ENSG00000011600	TYROBP	TYRO protein tyrosine kinase binding protein	0.165488	0.34826	0.752992
ENSG00000011638	TMEM159	transmembrane protein 159	-0.0582232	0.732716	0.932499
ENSG00000011677	GABRA3	gamma-aminobutyric acid type A receptor alpha3 subunit
ENSG00000012048	BRCA1	BRCA1, DNA repair associated	0.649815	0.022364	0.252256
ENSG00000012061	ERCC1	ERCC excision repair 1, endonuclease non-catalytic subunit	-0.0132085	0.921949	0.982861
ENSG00000012124	CD22	CD22 molecule	0.403607	0.383813	0.777657
ENSG00000012171	SEMA3B	semaphorin 3B	-0.059094	0.753574	0.937729
ENSG00000012174	MBTPS2	membrane bound transcription factor peptidase, site 2	-0.225556	0.00526983	0.115827
ENSG00000012211	PRICKLE3	prickle planar cell polarity protein 3	0.0102592	0.93412	0.985403
ENSG00000012223	LTF	lactotransferrin	0.429257	0.239815	0.670828
ENSG00000012232	EXTL3	exostosin like glycosyltransferase 3	0.191681	0.0169567	0.218916
ENSG00000012504	NR1H4	nuclear receptor subfamily 1 group H member 4	-0.0821765	0.370375	0.767459
ENSG00000012660	ELOVL5	ELOVL fatty acid elongase 5	0.157712	0.210795	0.643465
ENSG00000012779	ALOX5	arachidonate 5-lipoxygenase	0.252138	0.191313	0.622949
ENSG00000012817	KDM5D	lysine demethylase 5D	-0.0434105	0.629472	0.893391
ENSG00000012822	CALCOCO1	calcium binding and coiled-coil domain 1	-0.137913	0.0875243	0.469633
ENSG00000012963	UBR7	ubiquitin protein ligase E3 component n-recognin 7 (putative)	0.141937	0.0764211	0.442438
ENSG00000012983	MAP4K5	mitogen-activated protein kinase kinase kinase kinase 5	0.00728371	0.947319	0.988226
ENSG00000013016	EHD3	EH domain containing 3	-0.00393237	0.977761	0.995959
ENSG00000013275	PSMC4	proteasome 26S subunit, ATPase 4	0.135473	0.247733	0.678198
ENSG00000013288	MAN2B2	mannosidase alpha class 2B member 2	-0.0382165	0.624483	0.89091
ENSG00000013293	SLC7A14	solute carrier family 7 member 14	-0.204911	0.831507
ENSG00000013297	CLDN11	claudin 11	-0.119348	0.659112	0.904396
ENSG00000013306	SLC25A39	solute carrier family 25 member 39	0.0530056	0.62831	0.893015
ENSG00000013364	MVP	major vault protein	0.421392	0.0531351	0.379117
ENSG00000013374	NUB1	negative regulator of ubiquitin like proteins 1	0.115785	0.0587811	0.396075
ENSG00000013375	PGM3	phosphoglucomutase 3	0.0575833	0.501508	0.834793
ENSG00000013392	RWDD2A	RWD domain containing 2A	0.165656	0.332081	0.742605
ENSG00000013441	CLK1	CDC like kinase 1	0.0539433	0.825857	0.960403
ENSG00000013503	POLR3B	RNA polymerase III subunit B	-0.0397825	0.639557	0.895892
ENSG00000013523	ANGEL1	angel homolog 1	-0.137555	0.188823	0.620915
ENSG00000013561	RNF14	ring finger protein 14	0.0226365	0.709196	0.923019
ENSG00000013563	DNASE1L1	deoxyribonuclease 1 like 1	0.0505418	0.606865	0.885766
ENSG00000013573	DDX11	DEAD/H-box helicase 11	-0.470089	0.228335	0.658262
ENSG00000013583	HEBP1	heme binding protein 1	-0.00758572	0.92806	0.985318
ENSG00000013588	GPRC5A	G protein-coupled receptor class C group 5 member A	-0.497521	0.114618	0.523469
ENSG00000013619	MAMLD1	mastermind like domain containing 1	-0.148245	0.312223	0.726864
ENSG00000013725	CD6	CD6 molecule	0.47078	0.0753456	0.439968
ENSG00000013810	TACC3	transforming acidic coiled-coil containing protein 3	0.13258	0.373298	0.769326
ENSG00000014123	UFL1	UFM1 specific ligase 1	-0.00453425	0.962308	0.991507
ENSG00000014138	POLA2	DNA polymerase alpha 2, accessory subunit	0.168278	0.206568	0.639018
ENSG00000014164	ZC3H3	zinc finger CCCH-type containing 3	0.0484272	0.665984	0.905987
ENSG00000014216	CAPN1	calpain 1	-0.0148414	0.912425	0.981741
ENSG00000014257	ACPP	acid phosphatase, prostate	0.128436	0.853564
ENSG00000014641	MDH1	malate dehydrogenase 1	0.0637474	0.427172	0.799138
ENSG00000014824	SLC30A9	solute carrier family 30 member 9	0.115572	0.25018	0.679092
ENSG00000014914	MTMR11	myotubularin related protein 11	-0.392447	0.205123	0.638568
ENSG00000014919	COX15	cytochrome c oxidase assembly homolog COX15	0.0240401	0.67298	0.910214
ENSG00000015133	CCDC88C	coiled-coil domain containing 88C	-0.467161	0.00170537	0.0597992
ENSG00000015153	YAF2	YY1 associated factor 2	0.151906	0.170362	0.59937
ENSG00000015171	ZMYND11	zinc finger MYND-type containing 11	0.0623944	0.433751	0.802896
ENSG00000015285	WAS	Wiskott-Aldrich syndrome	0.242104	0.194652	0.626658
ENSG00000015413	DPEP1	dipeptidase 1	-0.832732	0.358701
ENSG00000015475	BID	BH3 interacting domain death agonist	0.0551059	0.544543	0.853755
ENSG00000015479	MATR3	matrin 3	-0.303392	0.628618	0.893015
ENSG00000015520	NPC1L1	NPC1 like intracellular cholesterol transporter 1	-0.273045	0.0989666	0.497622
ENSG00000015532	XYLT2	xylosyltransferase 2	-0.103595	0.264711	0.691083
ENSG00000015568	RGPD5	RANBP2-like and GRIP domain containing 5	0.229504	0.941128
ENSG00000015592	STMN4	stathmin 4	0.344918	0.911624
ENSG00000015676	NUDCD3	NudC domain containing 3	-0.0912543	0.227255	0.657797
ENSG00000016082	ISL1	ISL LIM homeobox 1	0.114091	0.970714
ENSG00000016391	CHDH	choline dehydrogenase	-0.179442	0.132551	0.549579
ENSG00000016402	IL20RA	interleukin 20 receptor subunit alpha	0.137709	0.772592	0.943416
ENSG00000016490	CLCA1	chloride channel accessory 1	-0.504593
ENSG00000016602	CLCA4	chloride channel accessory 4	0.555296
ENSG00000016864	GLT8D1	glycosyltransferase 8 domain containing 1	-0.12699	0.30689	0.723224
ENSG00000017260	ATP2C1	ATPase secretory pathway Ca2+ transporting 1	0.0073605	0.91648	0.982169
ENSG00000017427	IGF1	insulin like growth factor 1	-0.628362	0.000666246	0.0341523
ENSG00000017483	SLC38A5	solute carrier family 38 member 5	0.495418	0.272053	0.694734
ENSG00000017797	RALBP1	ralA binding protein 1	-0.0334798	0.521075	0.843779
ENSG00000018189	RUFY3	RUN and FYVE domain containing 3	-0.0568035	0.565784	0.865893
ENSG00000018236	CNTN1	contactin 1	0.559648	0.153207	0.578192
ENSG00000018280	SLC11A1	solute carrier family 11 member 1	0.235197	0.304662	0.72276
ENSG00000018408	WWTR1	WW domain containing transcription regulator 1	0.206119	0.17034	0.59937
ENSG00000018510	AGPS	alkylglycerone phosphate synthase	0.198979	0.117956	0.528224
ENSG00000018610	CXorf56	chromosome X open reading frame 56	0.126928	0.451463	0.812451
ENSG00000018625	ATP1A2	ATPase Na+/K+ transporting subunit alpha 2	0.163343	0.654955	0.902729
ENSG00000018699	TTC27	tetratricopeptide repeat domain 27	-0.213831	0.0117802	0.178265
ENSG00000018869	ZNF582	zinc finger protein 582	0.133076	0.459711	0.815436
ENSG00000019102	VSIG2	V-set and immunoglobulin domain containing 2	-0.217553	0.581784	0.875436
ENSG00000019144	PHLDB1	pleckstrin homology like domain family B member 1	-0.0750232	0.613554	0.887507
ENSG00000019169	MARCO	macrophage receptor with collagenous structure	0.23319	0.220175	0.649992
ENSG00000019186	CYP24A1	cytochrome P450 family 24 subfamily A member 1
ENSG00000019485	PRDM11	PR/SET domain 11	-0.137274	0.30222	0.721976
ENSG00000019505	SYT13	synaptotagmin 13	-0.260544	0.428928	0.800605
ENSG00000019549	SNAI2	snail family transcriptional repressor 2	-0.54295	0.00279244	0.079696
ENSG00000019582	CD74	CD74 molecule	0.277074	0.120029	0.530606
ENSG00000019991	HGF	hepatocyte growth factor	-0.141237	0.42033	0.796154
ENSG00000019995	ZRANB1	zinc finger RANBP2-type containing 1	-0.198427	0.0328821	0.299545
ENSG00000020129	NCDN	neurochondrin	0.131351	0.268882	0.692475
ENSG00000020181	ADGRA2	adhesion G protein-coupled receptor A2	-0.0932516	0.441216	0.805442
ENSG00000020256	ZFP64	ZFP64 zinc finger protein	-0.147645	0.125866	0.539325
ENSG00000020426	MNAT1	MNAT1, CDK activating kinase assembly factor	0.123505	0.414283	0.793213
ENSG00000020577	SAMD4A	sterile alpha motif domain containing 4A	0.034777	0.761483	0.940682
ENSG00000020633	RUNX3	runt related transcription factor 3	0.446427	0.0143493	0.199151
ENSG00000020922	MRE11	MRE11 homolog, double strand break repair nuclease	-0.0351492	0.794251	0.951329
ENSG00000021300	PLEKHB1	pleckstrin homology domain containing B1	-0.44196	0.051486	0.374102
ENSG00000021355	SERPINB1	serpin family B member 1	-0.177906	0.0820053	0.458336
ENSG00000021461	CYP3A43	cytochrome P450 family 3 subfamily A member 43	-0.381957	0.205533	0.638656
ENSG00000021488	SLC7A9	solute carrier family 7 member 9	0.018598	0.865712	0.969731
ENSG00000021574	SPAST	spastin	0.196862	0.174965	0.604569
ENSG00000021645	NRXN3	neurexin 3	0.239349	0.720729	0.927649
ENSG00000021762	OSBPL5	oxysterol binding protein like 5	0.10086	0.520787	0.843779
ENSG00000021776	AQR	aquarius intron-binding spliceosomal factor	0.108209	0.194995	0.62704
ENSG00000021826	CPS1	carbamoyl-phosphate synthase 1	-0.492578	0.000236086	0.0167416
ENSG00000021852	C8B	complement C8 beta chain	-0.119924	0.249889	0.679092
ENSG00000022267	FHL1	four and a half LIM domains 1	0.0388493	0.72304	0.928884
ENSG00000022277	RTF2	replication termination factor 2	-0.0265763	0.767704	0.94198
ENSG00000022355	GABRA1	gamma-aminobutyric acid type A receptor alpha1 subunit
ENSG00000022556	NLRP2	NLR family pyrin domain containing 2	-0.217714	0.702581	0.92137
ENSG00000022567	SLC45A4	solute carrier family 45 member 4	-0.235652	0.280595	0.703681
ENSG00000022840	RNF10	ring finger protein 10	-0.0564182	0.367662	0.766418
ENSG00000022976	ZNF839	zinc finger protein 839	-0.113925	0.397875	0.783732
ENSG00000023041	ZDHHC6	zinc finger DHHC-type containing 6	-0.106821	0.141469	0.56121
ENSG00000023171	GRAMD1B	GRAM domain containing 1B	0.00323202	0.986833	0.998151
ENSG00000023191	RNH1	ribonuclease/angiogenin inhibitor 1	-0.014613	0.90843	0.979864
ENSG00000023228	NDUFS1	NADH:ubiquinone oxidoreductase core subunit S1	0.0859532	0.425513	0.798492
ENSG00000023287	RB1CC1	RB1 inducible coiled-coil 1	0.0566475	0.711065	0.923712
ENSG00000023318	ERP44	endoplasmic reticulum protein 44	-0.00503181	0.953774	0.989419
ENSG00000023330	ALAS1	5'-aminolevulinate synthase 1	-0.311522	0.104537	0.508507
ENSG00000023445	BIRC3	baculoviral IAP repeat containing 3	0.756746	0.000424053	0.0247618
ENSG00000023516	AKAP11	A-kinase anchoring protein 11	-0.0337314	0.799395	0.951767
ENSG00000023572	GLRX2	glutaredoxin 2	-0.117271	0.252292	0.6809
ENSG00000023608	SNAPC1	small nuclear RNA activating complex polypeptide 1	-0.0532438	0.795657	0.951767
ENSG00000023697	DERA	deoxyribose-phosphate aldolase	-0.159512	0.00542667	0.117236
ENSG00000023734	STRAP	serine/threonine kinase receptor associated protein	0.0549175	0.286055	0.707509
ENSG00000023839	ABCC2	ATP binding cassette subfamily C member 2	-0.299871	0.00336073	0.0883702
ENSG00000023892	DEF6	DEF6, guanine nucleotide exchange factor	0.11582	0.412344	0.79203
ENSG00000023902	PLEKHO1	pleckstrin homology domain containing O1	0.0814265	0.576265	0.872203
ENSG00000023909	GCLM	glutamate-cysteine ligase modifier subunit	-0.413603	0.00675971	0.131026
ENSG00000024048	UBR2	ubiquitin protein ligase E3 component n-recognin 2	0.0340732	0.769727	0.942474
ENSG00000024422	EHD2	EH domain containing 2	-0.270174	0.0751274	0.439494
ENSG00000024526	DEPDC1	DEP domain containing 1	0.97808	0.322783
ENSG00000024862	CCDC28A	coiled-coil domain containing 28A	-0.0414659	0.714821	0.925306
ENSG00000025039	RRAGD	Ras related GTP binding D	-0.375736	0.00895346	0.152648
ENSG00000025156	HSF2	heat shock transcription factor 2	-0.125155	0.375554	0.771188
ENSG00000025293	PHF20	PHD finger protein 20	-0.0223372	0.742839	0.935065
ENSG00000025423	HSD17B6	hydroxysteroid 17-beta dehydrogenase 6	-0.00761954	0.947259	0.988226
ENSG00000025434	NR1H3	nuclear receptor subfamily 1 group H member 3	-0.0996555	0.354688	0.756422
ENSG00000025708	TYMP	thymidine phosphorylase	0.687243	0.00032549	0.0200997
ENSG00000025770	NCAPH2	non-SMC condensin II complex subunit H2	0.0086548	0.938935	0.986139
ENSG00000025772	TOMM34	translocase of outer mitochondrial membrane 34	-0.0148363	0.887596	0.974581
ENSG00000025796	SEC63	SEC63 homolog, protein translocation regulator	-0.0387026	0.682851	0.913467
ENSG00000025800	KPNA6	karyopherin subunit alpha 6	0.0794801	0.352197	0.755305
ENSG00000026025	VIM	vimentin	0.141621	0.255012	0.683632
ENSG00000026036	RTEL1-TNFRSF6B	RTEL1-TNFRSF6B readthrough (NMD candidate)	-0.51361	0.755381
ENSG00000026103	FAS	Fas cell surface death receptor	-0.0298961	0.847297	0.965075
ENSG00000026297	RNASET2	ribonuclease T2	-0.00391054	0.97495	0.995617
ENSG00000026508	CD44	CD44 molecule (Indian blood group)	0.38275	0.0225961	0.253693
ENSG00000026559	KCNG1	potassium voltage-gated channel modifier subfamily G member 1	0.1407	0.810329
ENSG00000026652	AGPAT4	1-acylglycerol-3-phosphate O-acyltransferase 4	0.303791	0.195908	0.627461
ENSG00000026751	SLAMF7	SLAM family member 7	0.476312	0.0704733	0.426138
ENSG00000026950	BTN3A1	butyrophilin subfamily 3 member A1	0.12773	0.229843	0.659881
ENSG00000027001	MIPEP	mitochondrial intermediate peptidase	-0.163654	0.0502721	0.370769
ENSG00000027075	PRKCH	protein kinase C eta	0.12569	0.245838	0.676391
ENSG00000027644	INSRR	insulin receptor related receptor	-0.386038	0.901139
ENSG00000027697	IFNGR1	interferon gamma receptor 1	0.123872	0.115367	0.524965
ENSG00000027847	B4GALT7	beta-1,4-galactosyltransferase 7	0.0786667	0.473735	0.821138
ENSG00000027869	SH2D2A	SH2 domain containing 2A	0.503164	0.0891212	0.473278
ENSG00000028116	VRK2	VRK serine/threonine kinase 2	-0.0140592	0.8973	0.977334
ENSG00000028137	TNFRSF1B	TNF receptor superfamily member 1B	0.0452469	0.742439	0.934983
ENSG00000028203	VEZT	vezatin, adherens junctions transmembrane protein	0.0640452	0.538296	0.851275
ENSG00000028277	POU2F2	POU class 2 homeobox 2	0.673739	0.000630285	0.0333192
ENSG00000028310	BRD9	bromodomain containing 9	0.0735545	0.413385	0.792713
ENSG00000028528	SNX1	sorting nexin 1	0.0685151	0.355246	0.757276
ENSG00000028839	TBPL1	TATA-box binding protein like 1	0.0546665	0.63295	0.894241
ENSG00000029153	ARNTL2	aryl hydrocarbon receptor nuclear translocator like 2	0.61376	0.0257666	0.270375
ENSG00000029363	BCLAF1	BCL2 associated transcription factor 1	0.113063	0.338402	0.746534
ENSG00000029364	SLC39A9	solute carrier family 39 member 9	0.0913159	0.149958	0.572456
ENSG00000029534	ANK1	ankyrin 1	0.758287	0.0996321	0.498015
ENSG00000029559	IBSP	integrin binding sialoprotein
ENSG00000029639	TFB1M	transcription factor B1, mitochondrial	-0.0630744	0.575639	0.871798
ENSG00000029725	RABEP1	rabaptin, RAB GTPase binding effector protein 1	0.0128417	0.873802	0.970768
ENSG00000029993	HMGB3	high mobility group box 3	0.459651	0.000822642	0.0385262
ENSG00000030066	NUP160	nucleoporin 160	0.0770712	0.515503	0.84066
ENSG00000030110	BAK1	BCL2 antagonist/killer 1	0.126206	0.531319	0.847632
ENSG00000030304	MUSK	muscle associated receptor tyrosine kinase	-0.83914	0.321381
ENSG00000030419	IKZF2	IKAROS family zinc finger 2	0.269916	0.348465	0.753278
ENSG00000030582	GRN	granulin precursor	0.0153823	0.906063	0.979399
ENSG00000031003	FAM13B	family with sequence similarity 13 member B	0.400946	0.00143248	0.0540022
ENSG00000031081	ARHGAP31	Rho GTPase activating protein 31	0.117711	0.316313	0.72953
ENSG00000031691	CENPQ	centromere protein Q	-0.626235	0.0300895	0.288215
ENSG00000031698	SARS	seryl-tRNA synthetase	-0.108667	0.183541	0.615152
ENSG00000031823	RANBP3	RAN binding protein 3	0.0705875	0.393347	0.782608
ENSG00000032219	ARID4A	AT-rich interaction domain 4A	-0.0411097	0.784363	0.947063
ENSG00000032389	EIPR1	EARP complex and GARP complex interacting protein 1	-0.262889	0.0281101	0.27922
ENSG00000032444	PNPLA6	patatin like phospholipase domain containing 6	0.0131209	0.91286	0.981741
ENSG00000032742	IFT88	intraflagellar transport 88	-0.0408939	0.738345	0.933497
ENSG00000033011	ALG1	ALG1, chitobiosyldiphosphodolichol beta-mannosyltransferase	-0.0605603	0.596462	0.881617
ENSG00000033030	ZCCHC8	zinc finger CCHC-type containing 8	-0.0870076	0.474759	0.821979
ENSG00000033050	ABCF2	ATP binding cassette subfamily F member 2	0.0335043	0.733512	0.932506
ENSG00000033100	CHPF2	chondroitin polymerizing factor 2	0.131245	0.265602	0.69129
ENSG00000033122	LRRC7	leucine rich repeat containing 7	0.422808	0.59759
ENSG00000033170	FUT8	fucosyltransferase 8	0.0272395	0.870675	0.970384
ENSG00000033178	UBA6	ubiquitin like modifier activating enzyme 6	0.419676	0.0124073	0.183235
ENSG00000033327	GAB2	GRB2 associated binding protein 2	-0.0752266	0.535423	0.84979
ENSG00000033627	ATP6V0A1	ATPase H+ transporting V0 subunit a1	0.0958229	0.348819	0.753468
ENSG00000033800	PIAS1	protein inhibitor of activated STAT 1	0.0126009	0.904123	0.979028
ENSG00000033867	SLC4A7	solute carrier family 4 member 7	0.230405	0.346954	0.751644
ENSG00000034053	APBA2	amyloid beta precursor protein binding family A member 2	0.511541	0.0490316	0.366059
ENSG00000034152	MAP2K3	mitogen-activated protein kinase kinase 3	-0.0728123	0.507507	0.837008
ENSG00000034239	EFCAB1	EF-hand calcium binding domain 1	-1.26835	0.0206083	0.242504
ENSG00000034510	TMSB10	thymosin beta 10	0.273593	0.0724509	0.43192
ENSG00000034533	ASTE1	asteroid homolog 1	-0.0852992	0.443028	0.806746
ENSG00000034677	RNF19A	ring finger protein 19A, RBR E3 ubiquitin protein ligase	-0.0600368	0.555771	0.860287
ENSG00000034693	PEX3	peroxisomal biogenesis factor 3	0.135647	0.201969	0.635628
ENSG00000034713	GABARAPL2	GABA type A receptor associated protein like 2	-0.0997205	0.12135	0.53173
ENSG00000034971	MYOC	myocilin	-0.256381	0.841379
ENSG00000035115	SH3YL1	SH3 and SYLF domain containing 1	-0.0157831	0.924487	0.984027
ENSG00000035141	FAM136A	family with sequence similarity 136 member A	0.024475	0.774108	0.943634
ENSG00000035403	VCL	vinculin	-0.0969146	0.318126	0.730464
ENSG00000035499	DEPDC1B	DEP domain containing 1B	0.296086	0.574252
ENSG00000035664	DAPK2	death associated protein kinase 2	0.114916	0.467208	0.819181
ENSG00000035681	NSMAF	neutral sphingomyelinase activation associated factor	0.089635	0.469346	0.820031
ENSG00000035687	ADSS	adenylosuccinate synthase	0.0538026	0.609012	0.885802
ENSG00000035720	STAP1	signal transducing adaptor family member 1	0.127933	0.863265
ENSG00000035862	TIMP2	TIMP metallopeptidase inhibitor 2	-0.0904257	0.309351	0.725029
ENSG00000035928	RFC1	replication factor C subunit 1	-0.0487379	0.569514	0.867302
ENSG00000036054	TBC1D23	TBC1 domain family member 23	0.0448916	0.707069	0.922778
ENSG00000036257	CUL3	cullin 3	-0.0466732	0.527396	0.846263
ENSG00000036448	MYOM2	myomesin 2	0.0925892	0.555492	0.860155
ENSG00000036473	OTC	ornithine carbamoyltransferase	-0.234376	0.00404493	0.0992109
ENSG00000036530	CYP46A1	cytochrome P450 family 46 subfamily A member 1	-0.119046	0.548608	0.856417
ENSG00000036549	AC118549.1	zinc finger ZZ-type containing 3	0.0651866	0.582329	0.875658
ENSG00000036565	SLC18A1	solute carrier family 18 member A1	0.805114	0.693161
ENSG00000036672	USP2	ubiquitin specific peptidase 2	0.125857	0.582048	0.875436
ENSG00000036828	CASR	calcium sensing receptor	0.2086	0.66543	0.905758
ENSG00000037042	TUBG2	tubulin gamma 2	0.186046	0.206429	0.639018
ENSG00000037241	RPL26L1	ribosomal protein L26 like 1	0.0644862	0.551857	0.858321
ENSG00000037280	FLT4	fms related tyrosine kinase 4	0.0410483	0.732982	0.932499
ENSG00000037474	NSUN2	NOP2/Sun RNA methyltransferase family member 2	-0.126496	0.0778486	0.446817
ENSG00000037637	FBXO42	F-box protein 42	0.0494419	0.551603	0.858213
ENSG00000037749	MFAP3	microfibril associated protein 3	0.0600214	0.581999	0.875436
ENSG00000037757	MRI1	methylthioribose-1-phosphate isomerase 1	0.0261819	0.818526	0.958415
ENSG00000037897	METTL1	methyltransferase like 1	0.0288458	0.85303	0.965764
ENSG00000037965	HOXC8	homeobox C8	-0.697726	0.813915
ENSG00000038002	AGA	aspartylglucosaminidase	-0.00100843	0.990884	0.998674
ENSG00000038210	PI4K2B	phosphatidylinositol 4-kinase type 2 beta	0.0896378	0.481989	0.825452
ENSG00000038219	BOD1L1	biorientation of chromosomes in cell division 1 like 1	0.121373	0.354029	0.756
ENSG00000038274	MAT2B	methionine adenosyltransferase 2B	-0.260546	0.00647964	0.128484
ENSG00000038295	TLL1	tolloid like 1	-0.235502	0.704015
ENSG00000038358	EDC4	enhancer of mRNA decapping 4	-0.0294572	0.677492	0.91217
ENSG00000038382	TRIO	trio Rho guanine nucleotide exchange factor	0.108027	0.261092	0.689722
ENSG00000038427	VCAN	versican	0.132546	0.627064	0.892808
ENSG00000038532	CLEC16A	C-type lectin domain containing 16A	0.145793	0.0558587	0.388241
ENSG00000038945	MSR1	macrophage scavenger receptor 1	0.417282	0.0163696	0.213162
ENSG00000039068	CDH1	cadherin 1	0.0785317	0.527363	0.846263
ENSG00000039123	MTREX	Mtr4 exosome RNA helicase	-0.0719702	0.309855	0.72566
ENSG00000039139	DNAH5	dynein axonemal heavy chain 5	0.952033	0.166258
ENSG00000039319	ZFYVE16	zinc finger FYVE-type containing 16	0.198892	0.22569	0.656057
ENSG00000039523	RIPOR1	RHO family interacting cell polarization regulator 1	0.130009	0.177988	0.607984
ENSG00000039537	C6	complement C6	-0.198873	0.0186787	0.231586
ENSG00000039560	RAI14	retinoic acid induced 14	0.152589	0.156809	0.58213
ENSG00000039600	SOX30	SRY-box 30	0.210057	0.899171
ENSG00000039650	PNKP	polynucleotide kinase 3'-phosphatase	-0.0388213	0.774176	0.943634
ENSG00000039987	BEST2	bestrophin 2	-0.116739	0.970034
ENSG00000040199	PHLPP2	PH domain and leucine rich repeat protein phosphatase 2	-0.106454	0.361456	0.761773
ENSG00000040275	SPDL1	spindle apparatus coiled-coil protein 1	0.13249	0.462341	0.815731
ENSG00000040341	STAU2	staufen double-stranded RNA binding protein 2	0.0922444	0.390181	0.780586
ENSG00000040487	PQLC2	PQ loop repeat containing 2	0.036656	0.770688	0.9429
ENSG00000040531	CTNS	cystinosin, lysosomal cystine transporter	0.359019	0.014281	0.198511
ENSG00000040608	RTN4R	reticulon 4 receptor	0.465508	0.0305824	0.289166
ENSG00000040633	PHF23	PHD finger protein 23	0.141721	0.313127	0.727727
ENSG00000040731	CDH10	cadherin 10	0.65269	0.833645
ENSG00000040933	INPP4A	inositol polyphosphate-4-phosphatase type I A	0.199786	0.0480049	0.362233
ENSG00000041353	RAB27B	RAB27B, member RAS oncogene family	-0.35136	0.160092	0.585647
ENSG00000041357	PSMA4	proteasome subunit alpha 4	0.058086	0.404256	0.78785
ENSG00000041515	MYO16	myosin XVI	-0.675744	6.9193e-05	0.00731559
ENSG00000041802	LSG1	large 60S subunit nuclear export GTPase 1	0.0917506	0.226848	0.657351
ENSG00000041880	PARP3	poly(ADP-ribose) polymerase family member 3	-0.0691731	0.468771	0.820026
ENSG00000041982	TNC	tenascin C	0.423648	0.394463	0.782608
ENSG00000041988	THAP3	THAP domain containing 3	-0.0078336	0.950439	0.988753
ENSG00000042062	RIPOR3	RIPOR family member 3	-0.121923	0.480044	0.825264
ENSG00000042088	TDP1	tyrosyl-DNA phosphodiesterase 1	0.145371	0.245187	0.675838
ENSG00000042286	AIFM2	apoptosis inducing factor, mitochondria associated 2	0.123639	0.26637	0.691863
ENSG00000042304	C2orf83	chromosome 2 open reading frame 83	0.460334	0.88224
ENSG00000042317	SPATA7	spermatogenesis associated 7	0.0117566	0.915795	0.982159
ENSG00000042429	MED17	mediator complex subunit 17	0.304191	0.212115	0.64527
ENSG00000042445	RETSAT	retinol saturase	0.068926	0.501724	0.834911
ENSG00000042493	CAPG	capping actin protein, gelsolin like	0.129292	0.540222	0.852548
ENSG00000042753	AP2S1	adaptor related protein complex 2 subunit sigma 1	0.0281641	0.811608	0.955906
ENSG00000042781	USH2A	usherin	0.0220062	0.869672	0.970062
ENSG00000042813	ZPBP	zona pellucida binding protein	0.547665	0.4431
ENSG00000042832	TG	thyroglobulin	-0.409709	0.61339
ENSG00000042980	ADAM28	ADAM metallopeptidase domain 28	0.225103	0.540657	0.852782
ENSG00000043039	BARX2	BARX homeobox 2	-1.08666	0.726124
ENSG00000043093	DCUN1D1	defective in cullin neddylation 1 domain containing 1	0.122448	0.377844	0.772517
ENSG00000043143	JADE2	jade family PHD finger 2	0.00793592	0.939515	0.986217
ENSG00000043355	ZIC2	Zic family member 2
ENSG00000043462	LCP2	lymphocyte cytosolic protein 2	0.308287	0.0324794	0.298665
ENSG00000043514	TRIT1	tRNA isopentenyltransferase 1	-0.252903	0.0285772	0.28225
ENSG00000043591	ADRB1	adrenoceptor beta 1	0.334014	0.571838	0.869185
ENSG00000044012	GUCA2B	guanylate cyclase activator 2B	-0.160885	0.673269	0.910214
ENSG00000044090	CUL7	cullin 7	0.0685101	0.512309	0.839786
ENSG00000044115	CTNNA1	catenin alpha 1	0.0465449	0.502895	0.834911
ENSG00000044446	PHKA2	phosphorylase kinase regulatory subunit alpha 2	0.0738979	0.414869	0.793792
ENSG00000044459	CNTLN	centlein	0.0964002	0.513337	0.839786
ENSG00000044524	EPHA3	EPH receptor A3	-0.0570557	0.816116	0.957515
ENSG00000044574	HSPA5	heat shock protein family A (Hsp70) member 5	0.346213	0.0685638	0.421346
ENSG00000046604	DSG2	desmoglein 2	0.171363	0.180996	0.61178
ENSG00000046647	GEMIN8	gem nuclear organelle associated protein 8	-0.0284711	0.829581	0.961381
ENSG00000046651	OFD1	OFD1, centriole and centriolar satellite protein	0.05182	0.660526	0.904656
ENSG00000046653	GPM6B	glycoprotein M6B	-0.0769961	0.870658	0.970384
ENSG00000046774	MAGEC2	MAGE family member C2
ENSG00000046889	PREX2	phosphatidylinositol-3,4,5-trisphosphate dependent Rac exchange factor 2	-0.140847	0.568753	0.86683
ENSG00000047056	WDR37	WD repeat domain 37	0.124143	0.178772	0.608968
ENSG00000047188	YTHDC2	YTH domain containing 2	0.170942	0.193781	0.626545
ENSG00000047230	CTPS2	CTP synthase 2	-0.13318	0.146771	0.569457
ENSG00000047249	ATP6V1H	ATPase H+ transporting V1 subunit H	0.00654793	0.943485	0.988027
ENSG00000047315	POLR2B	RNA polymerase II subunit B	0.0466137	0.548083	0.856362
ENSG00000047346	FAM214A	family with sequence similarity 214 member A	0.0391141	0.830566	0.961381
ENSG00000047365	ARAP2	ArfGAP with RhoGAP domain, ankyrin repeat and PH domain 2	0.0743763	0.597057	0.88183
ENSG00000047410	TPR	translocated promoter region, nuclear basket protein	0.0985249	0.321269	0.733578
ENSG00000047457	CP	ceruloplasmin	-0.0430192	0.756142	0.939355
ENSG00000047578	KIAA0556	KIAA0556	0.348075	0.00769657	0.140044
ENSG00000047579	DTNBP1	dystrobrevin binding protein 1	0.013127	0.919604	0.982201
ENSG00000047597	XK	X-linked Kx blood group	1.18039	1.07569e-05	0.00255315
ENSG00000047617	ANO2	anoctamin 2	0.241127	0.871554
ENSG00000047621	C12orf4	chromosome 12 open reading frame 4	0.290967	0.037266	0.318094
ENSG00000047634	SCML1	Scm polycomb group protein like 1	0.0925025	0.65923	0.904396
ENSG00000047644	WWC3	WWC family member 3	-0.056587	0.626053	0.892097
ENSG00000047648	ARHGAP6	Rho GTPase activating protein 6	0.112901	0.567318	0.866327
ENSG00000047662	FAM184B	family with sequence similarity 184 member B	-0.502709	0.86209
ENSG00000047849	MAP4	microtubule associated protein 4	0.109757	0.232003	0.662069
ENSG00000047932	GOPC	golgi associated PDZ and coiled-coil motif containing	0.0701345	0.514696	0.840056
ENSG00000047936	ROS1	ROS proto-oncogene 1, receptor tyrosine kinase	0.553254	0.422299
ENSG00000048028	USP28	ubiquitin specific peptidase 28	-0.0860132	0.325059	0.736609
ENSG00000048052	HDAC9	histone deacetylase 9	0.25931	0.194241	0.626614
ENSG00000048140	TSPAN17	tetraspanin 17	0.262488	0.0244972	0.264498
ENSG00000048162	NOP16	NOP16 nucleolar protein	-0.228795	0.0940813	0.485577
ENSG00000048342	CC2D2A	coiled-coil and C2 domain containing 2A	-0.257086	0.0603241	0.401471
ENSG00000048392	RRM2B	ribonucleotide reductase regulatory TP53 inducible subunit M2B	0.0930893	0.377481	0.772517
ENSG00000048405	ZNF800	zinc finger protein 800	0.109162	0.386274	0.779363
ENSG00000048462	TNFRSF17	TNF receptor superfamily member 17	0.0252961	0.955593	0.990216
ENSG00000048471	SNX29	sorting nexin 29	0.139997	0.0268305	0.273451
ENSG00000048540	LMO3	LIM domain only 3	0.825811	0.712804
ENSG00000048544	MRPS10	mitochondrial ribosomal protein S10	0.0945898	0.187355	0.619494
ENSG00000048545	GUCA1A	guanylate cyclase activator 1A
ENSG00000048649	RSF1	remodeling and spacing factor 1	0.0320147	0.767385	0.941816
ENSG00000048707	VPS13D	vacuolar protein sorting 13 homolog D	0.35141	0.00106059	0.0449897
ENSG00000048740	CELF2	CUGBP Elav-like family member 2	0.270044	0.124155	0.537353
ENSG00000048828	FAM120A	family with sequence similarity 120A	0.0108934	0.803964	0.953119
ENSG00000048991	R3HDM1	R3H domain containing 1	-0.008153	0.93048	0.985403
ENSG00000049089	COL9A2	collagen type IX alpha 2 chain	-0.0570377	0.87614	0.971601
ENSG00000049130	KITLG	KIT ligand	0.105064	0.609971	0.885939
ENSG00000049167	ERCC8	ERCC excision repair 8, CSA ubiquitin ligase complex subunit	-0.00766916	0.953113	0.989043
ENSG00000049192	ADAMTS6	ADAM metallopeptidase with thrombospondin type 1 motif 6	0.283135	0.65525
ENSG00000049239	H6PD	hexose-6-phosphate dehydrogenase/glucose 1-dehydrogenase	-0.115346	0.218803	0.649874
ENSG00000049245	VAMP3	vesicle associated membrane protein 3	-0.0935551	0.187441	0.619494
ENSG00000049246	PER3	period circadian regulator 3	0.0228439	0.916596	0.982169
ENSG00000049247	UTS2	urotensin 2	0.306629	0.777502
ENSG00000049249	TNFRSF9	TNF receptor superfamily member 9	0.36933	0.496804	0.833455
ENSG00000049283	EPN3	epsin 3	-0.809438	0.406539
ENSG00000049323	LTBP1	latent transforming growth factor beta binding protein 1	-0.0394662	0.752264	0.937729
ENSG00000049449	RCN1	reticulocalbin 1	0.118122	0.283872	0.705919
ENSG00000049540	ELN	elastin	-0.72711	0.00161014	0.0578066
ENSG00000049541	RFC2	replication factor C subunit 2	0.142394	0.100897	0.501302
ENSG00000049618	ARID1B	AT-rich interaction domain 1B	0.0293842	0.643385	0.897348
ENSG00000049656	CLPTM1L	CLPTM1 like	0.593724	0.000556989	0.0304837
ENSG00000049759	NEDD4L	neural precursor cell expressed, developmentally down-regulated 4-like, E3 ubiquitin protein ligase	-0.407939	0.00205073	0.0670259
ENSG00000049768	FOXP3	forkhead box P3	-0.304171	0.408542	0.790134
ENSG00000049769	PPP1R3F	protein phosphatase 1 regulatory subunit 3F	-0.0680928	0.749972	0.936837
ENSG00000049860	HEXB	hexosaminidase subunit beta	-0.0939661	0.0927309	0.481456
ENSG00000049883	PTCD2	pentatricopeptide repeat domain 2	-0.0865854	0.468509	0.819841
ENSG00000050030	NEXMIF	neurite extension and migration factor	0.0628832	0.950254
ENSG00000050130	JKAMP	JNK1/MAPK8 associated membrane protein	-0.00545082	0.953972	0.989419
ENSG00000050165	DKK3	dickkopf WNT signaling pathway inhibitor 3	-0.0266544	0.898327	0.977395
ENSG00000050327	ARHGEF5	Rho guanine nucleotide exchange factor 5	-0.368773	0.0153064	0.206393
ENSG00000050344	NFE2L3	nuclear factor, erythroid 2 like 3	0.285022	0.329724	0.740551
ENSG00000050393	MCUR1	mitochondrial calcium uniporter regulator 1	0.00752633	0.922204	0.982899
ENSG00000050405	LIMA1	LIM domain and actin binding 1	0.151425	0.0972861	0.49318
ENSG00000050426	LETMD1	LETM1 domain containing 1	-0.165977	0.0827889	0.460136
ENSG00000050438	SLC4A8	solute carrier family 4 member 8	-0.284291	0.61241	0.886863
ENSG00000050555	LAMC3	laminin subunit gamma 3	-0.183452	0.369094	0.766439
ENSG00000050628	PTGER3	prostaglandin E receptor 3	0.229108	0.577383	0.873018
ENSG00000050730	TNIP3	TNFAIP3 interacting protein 3	0.771979	0.243746
ENSG00000050748	MAPK9	mitogen-activated protein kinase 9	-0.0117466	0.830384	0.961381
ENSG00000050767	COL23A1	collagen type XXIII alpha 1 chain	-0.0625088	0.888281	0.974587
ENSG00000050820	BCAR1	BCAR1, Cas family scaffold protein	0.042872	0.753824	0.937729
ENSG00000051009	FAM160A2	family with sequence similarity 160 member A2	-0.028184	0.797619	0.951767
ENSG00000051108	HERPUD1	homocysteine inducible ER protein with ubiquitin like domain 1	0.0614363	0.491416	0.830491
ENSG00000051128	HOMER3	homer scaffold protein 3	0.13099	0.466734	0.818604
ENSG00000051180	RAD51	RAD51 recombinase	0.42467	0.212604	0.645915
ENSG00000051341	POLQ	DNA polymerase theta	1.5792	0.00821561
ENSG00000051382	PIK3CB	phosphatidylinositol-4,5-bisphosphate 3-kinase catalytic subunit beta	0.111891	0.247638	0.678198
ENSG00000051523	CYBA	cytochrome b-245 alpha chain	0.13243	0.492741	0.831221
ENSG00000051596	THOC3	THO complex 3	-0.124883	0.420462	0.796196
ENSG00000051620	HEBP2	heme binding protein 2	-0.0815823	0.258925	0.687367
ENSG00000051825	MPHOSPH9	M-phase phosphoprotein 9	0.0822262	0.623489	0.890214
ENSG00000052126	PLEKHA5	pleckstrin homology domain containing A5	0.114791	0.281036	0.703957
ENSG00000052344	PRSS8	serine protease 8	0.0125622	0.94915	0.988466
ENSG00000052723	SIKE1	suppressor of IKBKE 1	0.0533394	0.740119	0.934401
ENSG00000052749	RRP12	ribosomal RNA processing 12 homolog	0.0863312	0.528591	0.84657
ENSG00000052795	FNIP2	folliculin interacting protein 2	-0.307068	0.0973418	0.493283
ENSG00000052802	MSMO1	methylsterol monooxygenase 1	-0.133846	0.422061	0.797329
ENSG00000052841	TTC17	tetratricopeptide repeat domain 17	-0.072545	0.378705	0.773042
ENSG00000052850	ALX4	ALX homeobox 4
ENSG00000053108	FSTL4	follistatin like 4	-0.386038	0.901139
ENSG00000053254	FOXN3	forkhead box N3	-0.170975	0.0715391	0.429604
ENSG00000053328	METTL24	methyltransferase like 24	-0.0981288	0.826507	0.960508
ENSG00000053371	AKR7A2	aldo-keto reductase family 7 member A2	-0.159637	0.186566	0.618459
ENSG00000053372	MRTO4	MRT4 homolog, ribosome maturation factor	0.0235143	0.797582	0.951767
ENSG00000053438	NNAT	neuronatin	-1.26726	0.664173
ENSG00000053501	USE1	unconventional SNARE in the ER 1	-0.192663	0.120907	0.531342
ENSG00000053524	MCF2L2	MCF.2 cell line derived transforming sequence-like 2	0.657511	0.791929
ENSG00000053702	NRIP2	nuclear receptor interacting protein 2	-0.180983	0.708795	0.922841
ENSG00000053747	LAMA3	laminin subunit alpha 3	0.779105	0.00298046	0.0823668
ENSG00000053770	AP5M1	adaptor related protein complex 5 subunit mu 1	0.126828	0.265257	0.691173
ENSG00000053900	ANAPC4	anaphase promoting complex subunit 4	0.149258	0.0864062	0.467292
ENSG00000053918	KCNQ1	potassium voltage-gated channel subfamily Q member 1	0.201788	0.163888	0.591182
ENSG00000054116	TRAPPC3	trafficking protein particle complex 3	0.0821734	0.208623	0.641399
ENSG00000054118	THRAP3	thyroid hormone receptor associated protein 3	0.00115082	0.99046	0.998487
ENSG00000054148	PHPT1	phosphohistidine phosphatase 1	0.128217	0.30278	0.722216
ENSG00000054179	ENTPD2	ectonucleoside triphosphate diphosphohydrolase 2	0.183075	0.51345	0.839786
ENSG00000054219	LY75	lymphocyte antigen 75	0.461684	0.111616	0.518376
ENSG00000054267	ARID4B	AT-rich interaction domain 4B	0.13812	0.348984	0.753468
ENSG00000054277	OPN3	opsin 3	-0.394006	4.61689e-05	0.00580481
ENSG00000054282	SDCCAG8	serologically defined colon cancer antigen 8	-0.278251	0.0207209	0.243315
ENSG00000054356	PTPRN	protein tyrosine phosphatase, receptor type N	0.48514	0.875896
ENSG00000054392	HHAT	hedgehog acyltransferase	0.422353	0.00554144	0.118432
ENSG00000054523	KIF1B	kinesin family member 1B	-0.0959748	0.268607	0.692443
ENSG00000054598	FOXC1	forkhead box C1	-0.0171538	0.966856	0.993187
ENSG00000054611	TBC1D22A	TBC1 domain family member 22A	-0.0138281	0.870822	0.970411
ENSG00000054654	SYNE2	spectrin repeat containing nuclear envelope protein 2	0.0711438	0.473661	0.821138
ENSG00000054690	PLEKHH1	pleckstrin homology, MyTH4 and FERM domain containing H1	0.198538	0.47866	0.825107
ENSG00000054793	ATP9A	ATPase phospholipid transporting 9A (putative)	0.123237	0.326967	0.738255
ENSG00000054796	SPO11	SPO11, initiator of meiotic double stranded breaks
ENSG00000054803	CBLN4	cerebellin 4 precursor	-0.479071	0.0982447	0.49552
ENSG00000054938	CHRDL2	chordin like 2	0.026126	0.938938	0.986139
ENSG00000054965	FAM168A	family with sequence similarity 168 member A	-0.0849456	0.17035	0.59937
ENSG00000054967	RELT	RELT, TNF receptor	0.407885	0.0642457	0.410245
ENSG00000054983	GALC	galactosylceramidase	-0.201758	0.0425834	0.341744
ENSG00000055044	NOP58	NOP58 ribonucleoprotein	0.068792	0.404601	0.788082
ENSG00000055070	SZRD1	SUZ RNA binding domain containing 1	0.0320543	0.664534	0.905227
ENSG00000055118	KCNH2	potassium voltage-gated channel subfamily H member 2	0.851824	0.193411
ENSG00000055130	CUL1	cullin 1	-0.0239613	0.6488	0.89983
ENSG00000055147	FAM114A2	family with sequence similarity 114 member A2	-0.0158388	0.870466	0.970384
ENSG00000055163	CYFIP2	cytoplasmic FMR1 interacting protein 2	-0.677823	5.14506e-05	0.00635437
ENSG00000055208	TAB2	TGF-beta activated kinase 1 (MAP3K7) binding protein 2	0.0178978	0.884913	0.974307
ENSG00000055211	GINM1	glycoprotein integral membrane 1	-0.0573078	0.34256	0.749165
ENSG00000055332	EIF2AK2	eukaryotic translation initiation factor 2 alpha kinase 2	0.18803	0.11787	0.528224
ENSG00000055483	USP36	ubiquitin specific peptidase 36	-0.0619399	0.354778	0.756499
ENSG00000055609	KMT2C	lysine methyltransferase 2C	0.206252	0.251903	0.680668
ENSG00000055732	MCOLN3	mucolipin 3	1.33855	0.257908
ENSG00000055813	CCDC85A	coiled-coil domain containing 85A	0.738029	0.325479
ENSG00000055917	PUM2	pumilio RNA binding family member 2	0.0160041	0.889147	0.974701
ENSG00000055950	MRPL43	mitochondrial ribosomal protein L43	0.0450819	0.614642	0.887825
ENSG00000055955	ITIH4	inter-alpha-trypsin inhibitor heavy chain family member 4	-0.238116	0.0251553	0.267157
ENSG00000055957	ITIH1	inter-alpha-trypsin inhibitor heavy chain 1	-0.0996781	0.382307	0.776452
ENSG00000056050	HPF1	histone PARylation factor 1	-0.0381458	0.720128	0.927411
ENSG00000056097	ZFR	zinc finger RNA binding protein	0.0104687	0.918608	0.982201
ENSG00000056277	ZNF280C	zinc finger protein 280C	0.0391604	0.874229	0.971066
ENSG00000056291	NPFFR2	neuropeptide FF receptor 2
ENSG00000056487	PHF21B	PHD finger protein 21B	0.344918	0.911624
ENSG00000056558	TRAF1	TNF receptor associated factor 1	0.128665	0.568579	0.86683
ENSG00000056586	RC3H2	ring finger and CCCH-type domains 2	0.137018	0.178447	0.608537
ENSG00000056736	IL17RB	interleukin 17 receptor B	-0.759694	3.76614e-05	0.00513037
ENSG00000056972	TRAF3IP2	TRAF3 interacting protein 2	-0.286369	0.0332526	0.301738
ENSG00000056998	GYG2	glycogenin 2	-0.0743506	0.696352	0.918183
ENSG00000057019	DCBLD2	discoidin, CUB and LCCL domain containing 2	-0.196007	0.0978026	0.494125
ENSG00000057149	SERPINB3	serpin family B member 3
ENSG00000057252	SOAT1	sterol O-acyltransferase 1	0.0892902	0.425355	0.79842
ENSG00000057294	PKP2	plakophilin 2	0.176227	0.0592418	0.39749
ENSG00000057468	MSH4	mutS homolog 4	0.38339	0.901813
ENSG00000057593	F7	coagulation factor VII	-0.0574851	0.612365	0.886863
ENSG00000057608	GDI2	GDP dissociation inhibitor 2	-0.0752338	0.220942	0.650125
ENSG00000057657	PRDM1	PR/SET domain 1	0.188916	0.421301	0.797029
ENSG00000057663	ATG5	autophagy related 5	0.0229255	0.778017	0.944981
ENSG00000057704	TMCC3	transmembrane and coiled-coil domain family 3	-0.0399825	0.746575	0.935931
ENSG00000057757	PITHD1	PITH domain containing 1	-0.0114554	0.861959	0.968325
ENSG00000057935	MTA3	metastasis associated 1 family member 3	-0.179748	0.0182914	0.228946
ENSG00000058056	USP13	ubiquitin specific peptidase 13	-0.00850226	0.935452	0.985403
ENSG00000058063	ATP11B	ATPase phospholipid transporting 11B (putative)	0.0681012	0.606783	0.885766
ENSG00000058085	LAMC2	laminin subunit gamma 2	-0.425209	0.140863	0.5604
ENSG00000058091	CDK14	cyclin dependent kinase 14	-0.074958	0.448279	0.810373
ENSG00000058262	SEC61A1	Sec61 translocon alpha 1 subunit	0.1877	0.0987251	0.497459
ENSG00000058272	PPP1R12A	protein phosphatase 1 regulatory subunit 12A	0.24268	0.0872902	0.469234
ENSG00000058335	RASGRF1	Ras protein specific guanine nucleotide releasing factor 1	0.606376	0.382368
ENSG00000058404	CAMK2B	calcium/calmodulin dependent protein kinase II beta	0.174588	0.37159	0.767925
ENSG00000058453	CROCC	ciliary rootlet coiled-coil, rootletin	0.0739226	0.609383	0.885802
ENSG00000058600	POLR3E	RNA polymerase III subunit E	-0.0349736	0.699481	0.920114
ENSG00000058668	ATP2B4	ATPase plasma membrane Ca2+ transporting 4	-0.0197654	0.824827	0.960403
ENSG00000058673	ZC3H11A	zinc finger CCCH-type containing 11A	-0.525228	0.578127
ENSG00000058729	RIOK2	RIO kinase 2	0.0504821	0.604412	0.885118
ENSG00000058799	YIPF1	Yip1 domain family member 1	0.127307	0.230077	0.660019
ENSG00000058804	NDC1	NDC1 transmembrane nucleoporin	-0.123743	0.218638	0.649874
ENSG00000058866	DGKG	diacylglycerol kinase gamma	-0.248422	0.25176	0.680668
ENSG00000059122	FLYWCH1	FLYWCH-type zinc finger 1	-0.140047	0.315988	0.729422
ENSG00000059145	UNKL	unk like zinc finger	-0.0563094	0.686349	0.913997
ENSG00000059377	TBXAS1	thromboxane A synthase 1	0.145126	0.345742	0.75124
ENSG00000059378	PARP12	poly(ADP-ribose) polymerase family member 12	0.169105	0.187503	0.619494
ENSG00000059573	ALDH18A1	aldehyde dehydrogenase 18 family member A1	0.364697	0.0149819	0.203664
ENSG00000059588	TARBP1	TAR (HIV-1) RNA binding protein 1	0.34765	0.0295829	0.285321
ENSG00000059691	GATB	glutamyl-tRNA amidotransferase subunit B	0.0406497	0.609655	0.885858
ENSG00000059728	MXD1	MAX dimerization protein 1	0.137483	0.503067	0.834911
ENSG00000059758	CDK17	cyclin dependent kinase 17	0.023139	0.855368	0.966126
ENSG00000059769	DNAJC25	DnaJ heat shock protein family (Hsp40) member C25	-0.336212	3.84487e-05	0.00514008
ENSG00000059804	SLC2A3	solute carrier family 2 member 3	0.37241	0.0177675	0.224198
ENSG00000059915	PSD	pleckstrin and Sec7 domain containing	0.156706	0.552964	0.858514
ENSG00000060069	CTDP1	CTD phosphatase subunit 1	-0.0439277	0.737491	0.932876
ENSG00000060138	YBX3	Y-box binding protein 3	0.32136	0.111031	0.51807
ENSG00000060140	STYK1	serine/threonine/tyrosine kinase 1	0.916933	0.523035
ENSG00000060237	WNK1	WNK lysine deficient protein kinase 1	0.085608	0.358968	0.759984
ENSG00000060339	CCAR1	cell division cycle and apoptosis regulator 1	0.0849115	0.482642	0.82576
ENSG00000060491	OGFR	opioid growth factor receptor	0.1218	0.312472	0.726937
ENSG00000060558	GNA15	G protein subunit alpha 15	0.336724	0.0930634	0.482102
ENSG00000060566	CREB3L3	cAMP responsive element binding protein 3 like 3	-0.233725	0.0584503	0.395028
ENSG00000060642	PIGV	phosphatidylinositol glycan anchor biosynthesis class V	-0.282045	6.68281e-05	0.00727342
ENSG00000060656	PTPRU	protein tyrosine phosphatase, receptor type U	0.663265	0.000902586	0.0405032
ENSG00000060688	SNRNP40	small nuclear ribonucleoprotein U5 subunit 40	0.120581	0.273881	0.696101
ENSG00000060709	RIMBP2	RIMS binding protein 2	-1.90554	0.0205615	0.242158
ENSG00000060718	COL11A1	collagen type XI alpha 1 chain	0.659485	0.824155
ENSG00000060749	QSER1	glutamine and serine rich 1	0.158666	0.353894	0.756
ENSG00000060762	MPC1	mitochondrial pyruvate carrier 1	0.332298	0.0041405	0.100404
ENSG00000060971	ACAA1	acetyl-CoA acyltransferase 1	-0.0671869	0.552247	0.858514
ENSG00000060982	BCAT1	branched chain amino acid transaminase 1	0.541714	0.0919951	0.480026
ENSG00000061273	HDAC7	histone deacetylase 7	0.0315279	0.774164	0.943634
ENSG00000061337	LZTS1	leucine zipper tumor suppressor 1	0.328786	0.207838	0.639881
ENSG00000061455	PRDM6	PR/SET domain 6	-0.385518	0.487468	0.828075
ENSG00000061492	WNT8A	Wnt family member 8A
ENSG00000061656	SPAG4	sperm associated antigen 4	-0.0664481	0.811866	0.955906
ENSG00000061676	NCKAP1	NCK associated protein 1	0.0373698	0.703981	0.921715
ENSG00000061794	MRPS35	mitochondrial ribosomal protein S35	-0.0996528	0.186243	0.617976
ENSG00000061918	GUCY1B1	guanylate cyclase 1 soluble subunit beta 1	-0.0546962	0.743283	0.935266
ENSG00000061936	SFSWAP	splicing factor SWAP	-0.0657528	0.43041	0.80219
ENSG00000061938	TNK2	tyrosine kinase non receptor 2	0.185351	0.265421	0.691173
ENSG00000061987	MON2	MON2 homolog, regulator of endosome-to-Golgi trafficking	-0.0496679	0.685843	0.913706
ENSG00000062038	CDH3	cadherin 3	0.556557	0.647973
ENSG00000062096	ARSF	arylsulfatase F	-0.503373	0.114999	0.52397
ENSG00000062194	GPBP1	GC-rich promoter binding protein 1	0.000707223	0.993932	0.998776
ENSG00000062282	DGAT2	diacylglycerol O-acyltransferase 2	0.395146	0.0275534	0.277047
ENSG00000062370	ZNF112	zinc finger protein 112	0.293835	0.181347	0.612358
ENSG00000062485	CS	citrate synthase	-0.0364708	0.704502	0.921715
ENSG00000062524	LTK	leukocyte receptor tyrosine kinase	0.172543	0.449501	0.810685
ENSG00000062582	MRPS24	mitochondrial ribosomal protein S24	0.432522	0.692139
ENSG00000062598	ELMO2	engulfment and cell motility 2	0.116478	0.303875	0.722657
ENSG00000062650	WAPL	WAPL cohesin release factor	0.1412	0.174964	0.604569
ENSG00000062716	VMP1	vacuole membrane protein 1	-0.0433216	0.560904	0.863158
ENSG00000062725	APPBP2	amyloid beta precursor protein binding protein 2	0.0739601	0.402179	0.786461
ENSG00000062822	POLD1	DNA polymerase delta 1, catalytic subunit	0.0019284	0.988024	0.998151
ENSG00000063015	SEZ6	seizure related 6 homolog	0.46849	0.675431
ENSG00000063046	EIF4B	eukaryotic translation initiation factor 4B	-0.269331	0.00263263	0.0772854
ENSG00000063127	SLC6A16	solute carrier family 6 member 16	-0.649598	0.000604623	0.0325796
ENSG00000063169	BICRA	BRD4 interacting chromatin remodeling complex associated protein	-0.00523397	0.974075	0.995328
ENSG00000063176	SPHK2	sphingosine kinase 2	0.0530411	0.684339	0.913467
ENSG00000063177	RPL18	ribosomal protein L18	-0.123076	0.205387	0.638656
ENSG00000063180	CA11	carbonic anhydrase 11	-0.199505	0.34567	0.75124
ENSG00000063241	ISOC2	isochorismatase domain containing 2	-0.111923	0.435867	0.803389
ENSG00000063244	U2AF2	U2 small nuclear RNA auxiliary factor 2	0.00411809	0.961163	0.991334
ENSG00000063245	EPN1	epsin 1	-0.116651	0.37396	0.769479
ENSG00000063322	MED29	mediator complex subunit 29	-0.0231547	0.741943	0.934949
ENSG00000063438	AHRR	aryl-hydrocarbon receptor repressor	-0.165183	0.738614	0.933705
ENSG00000063515	GSC2	goosecoid homeobox 2
ENSG00000063587	ZNF275	zinc finger protein 275	-0.194581	0.00939315	0.156433
ENSG00000063601	MTMR1	myotubularin related protein 1	-0.000784021	0.993327	0.99876
ENSG00000063660	GPC1	glypican 1	0.402623	0.0240683	0.26201
ENSG00000063761	ADCK1	aarF domain containing kinase 1	0.322086	0.0517829	0.374787
ENSG00000063854	HAGH	hydroxyacylglutathione hydrolase	0.00100845	0.99218	0.99876
ENSG00000063978	RNF4	ring finger protein 4	-0.00387603	0.9615	0.991334
ENSG00000064012	CASP8	caspase 8	0.123997	0.225261	0.655439
ENSG00000064042	LIMCH1	LIM and calponin homology domains 1	0.0192479	0.868871	0.969846
ENSG00000064102	INTS13	integrator complex subunit 13	0.185012	0.0417883	0.339068
ENSG00000064115	TM7SF3	transmembrane 7 superfamily member 3	-0.300322	0.00518521	0.115047
ENSG00000064195	DLX3	distal-less homeobox 3	-0.401345	0.897167
ENSG00000064199	SPA17	sperm autoantigenic protein 17	0.450761	0.187312	0.619494
ENSG00000064201	TSPAN32	tetraspanin 32	0.72946	0.0747886	0.438182
ENSG00000064205	CCN5	cellular communication network factor 5	-0.337517	0.564243	0.865053
ENSG00000064218	DMRT3	doublesex and mab-3 related transcription factor 3	-0.116739	0.970034
ENSG00000064225	ST3GAL6	ST3 beta-galactoside alpha-2,3-sialyltransferase 6	-0.28301	0.0195806	0.237211
ENSG00000064270	ATP2C2	ATPase secretory pathway Ca2+ transporting 2	-0.687238	0.415157
ENSG00000064300	NGFR	nerve growth factor receptor	-0.138779	0.399891	0.784705
ENSG00000064309	CDON	cell adhesion associated, oncogene regulated	-0.00432358	0.9756	0.99587
ENSG00000064313	TAF2	TATA-box binding protein associated factor 2	0.0664074	0.548935	0.856417
ENSG00000064393	HIPK2	homeodomain interacting protein kinase 2	-0.0117858	0.859304	0.967679
ENSG00000064419	TNPO3	transportin 3	-0.111689	0.110503	0.517917
ENSG00000064489	BORCS8-MEF2B	BORCS8-MEF2B readthrough	-0.116739	0.970034
ENSG00000064490	RFXANK	regulatory factor X associated ankyrin containing protein	0.0548075	0.663542	0.904913
ENSG00000064545	TMEM161A	transmembrane protein 161A	-0.11467	0.391356	0.781212
ENSG00000064547	LPAR2	lysophosphatidic acid receptor 2	0.270299	0.328219	0.739502
ENSG00000064601	CTSA	cathepsin A	-0.0747843	0.418624	0.795631
ENSG00000064607	SUGP2	SURP and G-patch domain containing 2	0.218611	0.0949448	0.488588
ENSG00000064651	SLC12A2	solute carrier family 12 member 2	0.0524857	0.83017	0.961381
ENSG00000064652	SNX24	sorting nexin 24	0.024247	0.821193	0.959148
ENSG00000064655	EYA2	EYA transcriptional coactivator and phosphatase 2	0.296999	0.605012	0.885195
ENSG00000064666	CNN2	calponin 2	-0.127248	0.342071	0.749165
ENSG00000064687	ABCA7	ATP binding cassette subfamily A member 7	0.425888	0.0284933	0.281624
ENSG00000064692	SNCAIP	synuclein alpha interacting protein	0.742626	0.0385373	0.323382
ENSG00000064703	DDX20	DEAD-box helicase 20	-0.0776802	0.474839	0.821979
ENSG00000064726	BTBD1	BTB domain containing 1	0.068552	0.383963	0.777733
ENSG00000064763	FAR2	fatty acyl-CoA reductase 2	0.00505951	0.980652	0.996853
ENSG00000064787	BCAS1	breast carcinoma amplified sequence 1	0.943899	0.163476	0.591182
ENSG00000064835	POU1F1	POU class 1 homeobox 1
ENSG00000064886	CHI3L2	chitinase 3 like 2	0.002408	0.994567	0.998819
ENSG00000064932	SBNO2	strawberry notch homolog 2	0.177156	0.126898	0.541371
ENSG00000064933	PMS1	PMS1 homolog 1, mismatch repair system component	0.235386	0.22071	0.649992
ENSG00000064961	HMG20B	high mobility group 20B	-0.0979542	0.340066	0.747632
ENSG00000064989	CALCRL	calcitonin receptor like receptor	0.0956873	0.556709	0.860879
ENSG00000064995	TAF11	TATA-box binding protein associated factor 11	0.0668294	0.473472	0.821138
ENSG00000064999	ANKS1A	ankyrin repeat and sterile alpha motif domain containing 1A	-0.135515	0.178004	0.607984
ENSG00000065000	AP3D1	adaptor related protein complex 3 subunit delta 1	0.0121368	0.831971	0.961652
ENSG00000065029	ZNF76	zinc finger protein 76	0.161816	0.0959893	0.491159
ENSG00000065054	SLC9A3R2	SLC9A3 regulator 2	-0.251488	0.0259689	0.271477
ENSG00000065057	NTHL1	nth like DNA glycosylase 1	-0.0744615	0.569563	0.867302
ENSG00000065060	UHRF1BP1	UHRF1 binding protein 1	0.271263	0.0381771	0.321739
ENSG00000065135	GNAI3	G protein subunit alpha i3	0.0573862	0.368717	0.766439
ENSG00000065150	IPO5	importin 5	-0.287154	0.00333716	0.0882072
ENSG00000065154	OAT	ornithine aminotransferase	-0.52143	0.0895646	0.474109
ENSG00000065183	WDR3	WD repeat domain 3	0.100248	0.347844	0.752482
ENSG00000065243	PKN2	protein kinase N2	-0.016915	0.915567	0.982082
ENSG00000065268	WDR18	WD repeat domain 18	0.190048	0.305962	0.723187
ENSG00000065308	TRAM2	translocation associated membrane protein 2	-0.371203	0.00214911	0.0684571
ENSG00000065320	NTN1	netrin 1	-0.467541	0.00740285	0.137779
ENSG00000065325	GLP2R	glucagon like peptide 2 receptor	-0.0331924	0.866218	0.969773
ENSG00000065328	MCM10	minichromosome maintenance 10 replication initiation factor	1.55801	0.0107595
ENSG00000065357	DGKA	diacylglycerol kinase alpha	0.15013	0.418476	0.795606
ENSG00000065361	ERBB3	erb-b2 receptor tyrosine kinase 3	-0.166232	0.0398783	0.329119
ENSG00000065371	ROPN1	rhophilin associated tail protein 1	0.401393	0.881386
ENSG00000065413	ANKRD44	ankyrin repeat domain 44	0.213623	0.220116	0.649992
ENSG00000065427	KARS	lysyl-tRNA synthetase	-0.177998	0.060858	0.402528
ENSG00000065457	ADAT1	adenosine deaminase, tRNA specific 1	0.26315	0.00442216	0.103898
ENSG00000065485	PDIA5	protein disulfide isomerase family A member 5	-0.147605	0.0585934	0.395144
ENSG00000065491	TBC1D22B	TBC1 domain family member 22B	0.281913	0.0899186	0.474983
ENSG00000065518	NDUFB4	NADH:ubiquinone oxidoreductase subunit B4	-0.0723866	0.413043	0.792362
ENSG00000065526	SPEN	spen family transcriptional repressor	-0.0204403	0.840369	0.963571
ENSG00000065534	MYLK	myosin light chain kinase	-0.105738	0.398097	0.783948
ENSG00000065548	ZC3H15	zinc finger CCCH-type containing 15	-0.0223052	0.694604	0.917287
ENSG00000065559	MAP2K4	mitogen-activated protein kinase kinase 4	0.015802	0.85331	0.965764
ENSG00000065600	TMEM206	transmembrane protein 206	-0.135595	0.612174	0.886863
ENSG00000065609	SNAP91	synaptosome associated protein 91	0.191032	0.950983
ENSG00000065613	SLK	STE20 like kinase	-0.0391462	0.704707	0.921715
ENSG00000065615	CYB5R4	cytochrome b5 reductase 4	0.00351084	0.9776	0.995959
ENSG00000065618	COL17A1	collagen type XVII alpha 1 chain	-1.52267
ENSG00000065621	GSTO2	glutathione S-transferase omega 2	-0.163094	0.519037	0.842681
ENSG00000065665	SEC61A2	Sec61 translocon alpha 2 subunit	-0.119167	0.419461	0.795757
ENSG00000065675	PRKCQ	protein kinase C theta	0.0210911	0.933663	0.985403
ENSG00000065717	TLE2	TLE family member 2, transcriptional corepressor	0.0219605	0.893021	0.975501
ENSG00000065802	ASB1	ankyrin repeat and SOCS box containing 1	-0.140876	0.177129	0.606777
ENSG00000065809	FAM107B	family with sequence similarity 107 member B	0.00915007	0.910744	0.981418
ENSG00000065833	ME1	malic enzyme 1	0.43743	0.139925	0.55794
ENSG00000065882	TBC1D1	TBC1 domain family member 1	-0.0137878	0.852733	0.965764
ENSG00000065883	CDK13	cyclin dependent kinase 13	0.110316	0.292362	0.713821
ENSG00000065911	MTHFD2	methylenetetrahydrofolate dehydrogenase (NADP+ dependent) 2, methenyltetrahydrofolate cyclohydrolase	0.292754	0.211176	0.643532
ENSG00000065923	SLC9A7	solute carrier family 9 member A7	-0.0456794	0.669194	0.907254
ENSG00000065970	FOXJ2	forkhead box J2	0.0734256	0.351889	0.755128
ENSG00000065978	YBX1	Y-box binding protein 1	0.00478626	0.96143	0.991334
ENSG00000065989	AC011529.1	phosphodiesterase 4A	0.0648211	0.691369	0.916209
ENSG00000066027	PPP2R5A	protein phosphatase 2 regulatory subunit B'alpha	-0.102385	0.205609	0.638656
ENSG00000066032	CTNNA2	catenin alpha 2	0.404025	0.833924
ENSG00000066044	ELAVL1	ELAV like RNA binding protein 1	0.184275	0.0223636	0.252256
ENSG00000066056	TIE1	tyrosine kinase with immunoglobulin like and EGF like domains 1	0.0914767	0.481936	0.825452
ENSG00000066084	DIP2B	disco interacting protein 2 homolog B	0.297152	0.041138	0.336137
ENSG00000066117	SMARCD1	SWI/SNF related, matrix associated, actin dependent regulator of chromatin, subfamily d, member 1	0.00849895	0.929279	0.985403
ENSG00000066135	KDM4A	lysine demethylase 4A	0.181955	0.0187131	0.231586
ENSG00000066136	NFYC	nuclear transcription factor Y subunit gamma	-0.0982987	0.125249	0.538181
ENSG00000066185	ZMYND12	zinc finger MYND-type containing 12	-0.319521	0.0426866	0.341935
ENSG00000066230	SLC9A3	solute carrier family 9 member A3	-0.823675	0.589493
ENSG00000066248	NGEF	neuronal guanine nucleotide exchange factor	0.0853139	0.578864	0.874593
ENSG00000066279	ASPM	abnormal spindle microtubule assembly	0.161183	0.605424	0.885195
ENSG00000066294	CD84	CD84 molecule	0.228921	0.15074	0.574006
ENSG00000066322	ELOVL1	ELOVL fatty acid elongase 1	0.13466	0.166565	0.594522
ENSG00000066336	SPI1	Spi-1 proto-oncogene	0.28462	0.136528	0.553635
ENSG00000066379	ZNRD1	zinc ribbon domain containing 1	0.0134085	0.891873	0.974944
ENSG00000066382	MPPED2	metallophosphoesterase domain containing 2	-0.570805	0.0883426	0.471476
ENSG00000066405	CLDN18	claudin 18	-0.0461644	0.988104
ENSG00000066422	ZBTB11	zinc finger and BTB domain containing 11	0.0299734	0.840732	0.963571
ENSG00000066427	ATXN3	ataxin 3	0.0114318	0.918178	0.982201
ENSG00000066455	GOLGA5	golgin A5	0.0965701	0.257107	0.685647
ENSG00000066468	FGFR2	fibroblast growth factor receptor 2	0.1916	0.1108	0.517917
ENSG00000066557	LRRC40	leucine rich repeat containing 40	0.0181436	0.893715	0.975648
ENSG00000066583	ISOC1	isochorismatase domain containing 1	0.0249318	0.713997	0.924808
ENSG00000066629	EML1	EMAP like 1	0.0119972	0.91187	0.981741
ENSG00000066651	TRMT11	tRNA methyltransferase 11 homolog	-0.35116	0.0575615	0.391295
ENSG00000066654	THUMPD1	THUMP domain containing 1	0.00342565	0.977586	0.995959
ENSG00000066697	MSANTD3	Myb/SANT DNA binding domain containing 3	0.127302	0.217658	0.649622
ENSG00000066735	KIF26A	kinesin family member 26A	0.147342	0.353682	0.756
ENSG00000066739	ATG2B	autophagy related 2B	-0.000891689	0.99358	0.99876
ENSG00000066777	ARFGEF1	ADP ribosylation factor guanine nucleotide exchange factor 1	0.0174106	0.861334	0.968246
ENSG00000066813	ACSM2B	acyl-CoA synthetase medium chain family member 2B	0.0658077	0.465128	0.818049
ENSG00000066827	ZFAT	zinc finger and AT-hook domain containing	-0.0444153	0.692638	0.916687
ENSG00000066855	MTFR1	mitochondrial fission regulator 1	-0.0446511	0.532702	0.848506
ENSG00000066923	STAG3	stromal antigen 3	0.236683	0.198283	0.630638
ENSG00000066926	FECH	ferrochelatase	0.0621925	0.391612	0.781212
ENSG00000066933	MYO9A	myosin IXA	0.103677	0.458024	0.814685
ENSG00000067048	DDX3Y	DEAD-box helicase 3 Y-linked	0.0368683	0.70631	0.922467
ENSG00000067057	PFKP	phosphofructokinase, platelet	0.00970724	0.964883	0.992256
ENSG00000067064	IDI1	isopentenyl-diphosphate delta isomerase 1	0.264788	0.183747	0.615372
ENSG00000067066	SP100	SP100 nuclear antigen	0.052915	0.536821	0.850434
ENSG00000067082	KLF6	Kruppel like factor 6	-0.0487253	0.603474	0.885003
ENSG00000067113	PLPP1	phospholipid phosphatase 1	0.0207168	0.817351	0.957818
ENSG00000067141	NEO1	neogenin 1	0.00431846	0.963975	0.991775
ENSG00000067167	TRAM1	translocation associated membrane protein 1	0.309104	0.00671789	0.130832
ENSG00000067177	PHKA1	phosphorylase kinase regulatory subunit alpha 1	0.339591	0.0393233	0.326449
ENSG00000067182	TNFRSF1A	TNF receptor superfamily member 1A	-0.115308	0.311494	0.726352
ENSG00000067191	CACNB1	calcium voltage-gated channel auxiliary subunit beta 1	-0.350669	0.491116
ENSG00000067208	EVI5	ecotropic viral integration site 5	0.216572	0.302411	0.722216
ENSG00000067221	STOML1	stomatin like 1	-0.0117408	0.918273	0.982201
ENSG00000067225	PKM	pyruvate kinase M1/2	0.205212	0.176212	0.605339
ENSG00000067248	DHX29	DExH-box helicase 29	0.0472567	0.616559	0.888563
ENSG00000067334	DNTTIP2	deoxynucleotidyltransferase terminal interacting protein 2	-0.00792272	0.929469	0.985403
ENSG00000067365	METTL22	methyltransferase like 22	-0.150149	0.259229	0.687714
ENSG00000067369	TP53BP1	tumor protein p53 binding protein 1	0.127046	0.29512	0.715423
ENSG00000067445	TRO	trophinin	-0.384258	0.338032	0.746534
ENSG00000067533	RRP15	ribosomal RNA processing 15 homolog	0.13744	0.341479	0.748732
ENSG00000067560	RHOA	ras homolog family member A	0.071065	0.361388	0.761773
ENSG00000067596	DHX8	DEAH-box helicase 8	0.0837629	0.371935	0.768232
ENSG00000067606	PRKCZ	protein kinase C zeta	-0.114576	0.288272	0.710001
ENSG00000067646	ZFY	zinc finger protein Y-linked	0.178871	0.270633	0.69339
ENSG00000067704	IARS2	isoleucyl-tRNA synthetase 2, mitochondrial	0.0456968	0.681837	0.913211
ENSG00000067715	SYT1	synaptotagmin 1	0.0253214	0.900757	0.97788
ENSG00000067798	NAV3	neuron navigator 3	0.71334	0.0798955	0.452752
ENSG00000067829	IDH3G	isocitrate dehydrogenase 3 (NAD(+)) gamma	0.0380004	0.759427	0.940673
ENSG00000067836	ROGDI	rogdi atypical leucine zipper	0.294	0.0297014	0.285674
ENSG00000067840	PDZD4	PDZ domain containing 4	0.00871901	0.968828	0.993896
ENSG00000067842	ATP2B3	ATPase plasma membrane Ca2+ transporting 3	0.803733	0.7214
ENSG00000067900	ROCK1	Rho associated coiled-coil containing protein kinase 1	0.0993506	0.315622	0.729128
ENSG00000067955	CBFB	core-binding factor subunit beta	0.177597	0.0944583	0.487092
ENSG00000067992	PDK3	pyruvate dehydrogenase kinase 3	0.000385113	0.998083	0.999157
ENSG00000068001	HYAL2	hyaluronidase 2	-0.00484165	0.969584	0.994481
ENSG00000068024	HDAC4	histone deacetylase 4	0.00720994	0.937267	0.98604
ENSG00000068028	RASSF1	Ras association domain family member 1	0.236497	0.0878629	0.470716
ENSG00000068078	FGFR3	fibroblast growth factor receptor 3	-0.190197	0.111416	0.518376
ENSG00000068079	IFI35	interferon induced protein 35	0.230685	0.149481	0.57125
ENSG00000068097	HEATR6	HEAT repeat containing 6	-0.0307653	0.833665	0.962335
ENSG00000068120	COASY	Coenzyme A synthase	-0.090421	0.30479	0.72276
ENSG00000068137	PLEKHH3	pleckstrin homology, MyTH4 and FERM domain containing H3	0.311686	0.0559718	0.388241
ENSG00000068305	MEF2A	myocyte enhancer factor 2A	0.0206369	0.86217	0.968484
ENSG00000068308	OTUD5	OTU deubiquitinase 5	-0.0459086	0.618059	0.88875
ENSG00000068323	TFE3	transcription factor binding to IGHM enhancer 3	-0.0150833	0.852191	0.965764
ENSG00000068354	TBC1D25	TBC1 domain family member 25	-0.0930078	0.499935	0.834409
ENSG00000068366	ACSL4	acyl-CoA synthetase long chain family member 4	1.07564	0.000385168	0.022874
ENSG00000068383	INPP5A	inositol polyphosphate-5-phosphatase A	0.02911	0.766581	0.941686
ENSG00000068394	GPKOW	G-patch domain and KOW motifs	-0.0893606	0.38925	0.780544
ENSG00000068400	GRIPAP1	GRIP1 associated protein 1	0.0980893	0.261499	0.68983
ENSG00000068438	FTSJ1	FtsJ RNA methyltransferase homolog 1	-0.0789644	0.451878	0.812451
ENSG00000068489	PRR11	proline rich 11	0.256051	0.260737	0.689567
ENSG00000068615	REEP1	receptor accessory protein 1	0.317252	0.0582348	0.394335
ENSG00000068650	ATP11A	ATPase phospholipid transporting 11A	0.0596122	0.567495	0.866327
ENSG00000068654	POLR1A	RNA polymerase I subunit A	0.218107	0.00592701	0.123275
ENSG00000068697	LAPTM4A	lysosomal protein transmembrane 4 alpha	-0.114486	0.00858772	0.149091
ENSG00000068724	TTC7A	tetratricopeptide repeat domain 7A	-0.00210248	0.989648	0.998487
ENSG00000068745	IP6K2	inositol hexakisphosphate kinase 2	0.161852	0.113301	0.520376
ENSG00000068781	STON1-GTF2A1L	STON1-GTF2A1L readthrough	-0.116739	0.970034
ENSG00000068784	SRBD1	S1 RNA binding domain 1	0.211366	0.0442654	0.347451
ENSG00000068796	KIF2A	kinesin family member 2A	0.13448	0.264883	0.691173
ENSG00000068831	RASGRP2	RAS guanyl releasing protein 2	-0.66115	0.00216052	0.0684571
ENSG00000068878	PSME4	proteasome activator subunit 4	-0.0807195	0.404379	0.78798
ENSG00000068885	IFT80	intraflagellar transport 80	0.245499	0.338178	0.746534
ENSG00000068903	SIRT2	sirtuin 2	-0.146747	0.141167	0.561049
ENSG00000068912	ERLEC1	endoplasmic reticulum lectin 1	0.0815151	0.319632	0.731995
ENSG00000068971	PPP2R5B	protein phosphatase 2 regulatory subunit B'beta	0.202695	0.137298	0.553635
ENSG00000068976	PYGM	glycogen phosphorylase, muscle associated	-0.437799	0.445087	0.80849
ENSG00000068985	PAGE1	PAGE family member 1
ENSG00000069011	PITX1	paired like homeodomain 1	-0.795142	0.659615
ENSG00000069018	TRPC7	transient receptor potential cation channel subfamily C member 7
ENSG00000069020	MAST4	microtubule associated serine/threonine kinase family member 4	0.322985	0.041621	0.338499
ENSG00000069122	ADGRF5	adhesion G protein-coupled receptor F5	-0.152931	0.199796	0.632048
ENSG00000069188	SDK2	sidekick cell adhesion molecule 2	0.00921106	0.975978	0.99587
ENSG00000069206	ADAM7	ADAM metallopeptidase domain 7
ENSG00000069248	NUP133	nucleoporin 133	-0.00643367	0.930818	0.985403
ENSG00000069275	NUCKS1	nuclear casein kinase and cyclin dependent kinase substrate 1	-0.0727935	0.285631	0.707285
ENSG00000069329	VPS35	VPS35, retromer complex component	-0.0391014	0.470285	0.820757
ENSG00000069345	DNAJA2	DnaJ heat shock protein family (Hsp40) member A2	-0.0682103	0.321721	0.733999
ENSG00000069399	BCL3	BCL3, transcription coactivator	-0.186578	0.330576	0.741108
ENSG00000069424	KCNAB2	potassium voltage-gated channel subfamily A regulatory beta subunit 2	0.0226876	0.890961	0.974937
ENSG00000069431	ABCC9	ATP binding cassette subfamily C member 9	0.268257	0.10246	0.504743
ENSG00000069482	GAL	galanin and GMAP prepropeptide	0.729634	0.814373
ENSG00000069493	CLEC2D	C-type lectin domain family 2 member D	0.40995	0.226607	0.657332
ENSG00000069509	FUNDC1	FUN14 domain containing 1	0.0472939	0.659979	0.904622
ENSG00000069535	MAOB	monoamine oxidase B	-0.184715	0.00429086	0.102716
ENSG00000069667	RORA	RAR related orphan receptor A	-0.106491	0.58707	0.877515
ENSG00000069696	DRD4	dopamine receptor D4	0.113918	0.721752	0.928441
ENSG00000069702	TGFBR3	transforming growth factor beta receptor 3	-0.338842	0.00110456	0.0461999
ENSG00000069712	KIAA1107	KIAA1107
ENSG00000069764	PLA2G10	phospholipase A2 group X	-0.213033	0.945334
ENSG00000069812	HES2	hes family bHLH transcription factor 2	-0.42451	0.891345
ENSG00000069849	ATP1B3	ATPase Na+/K+ transporting subunit beta 3	0.250855	0.0652278	0.413333
ENSG00000069869	NEDD4	neural precursor cell expressed, developmentally down-regulated 4, E3 ubiquitin protein ligase	-0.3649	0.0150019	0.203664
ENSG00000069943	PIGB	phosphatidylinositol glycan anchor biosynthesis class B	-0.206889	0.121999	0.532646
ENSG00000069956	MAPK6	mitogen-activated protein kinase 6	0.133497	0.303487	0.722216
ENSG00000069966	GNB5	G protein subunit beta 5	-0.246525	0.0215329	0.247135
ENSG00000069974	RAB27A	RAB27A, member RAS oncogene family	0.0356537	0.79388	0.951329
ENSG00000069998	HDHD5	haloacid dehalogenase like hydrolase domain containing 5	0.00759142	0.940492	0.986658
ENSG00000070010	UFD1	ubiquitin recognition factor in ER associated degradation 1	0.0697829	0.487998	0.828175
ENSG00000070018	LRP6	LDL receptor related protein 6	0.30816	0.126021	0.539659
ENSG00000070019	GUCY2C	guanylate cyclase 2C	0.325328	0.452445	0.81255
ENSG00000070031	SCT	secretin	-0.252255	0.794771
ENSG00000070047	PHRF1	PHD and ring finger domains 1	0.158543	0.0308609	0.290617
ENSG00000070061	ELP1	elongator complex protein 1	0.148756	0.162905	0.590059
ENSG00000070081	NUCB2	nucleobindin 2	0.369994	0.0693742	0.423036
ENSG00000070087	PFN2	profilin 2	-0.229131	0.226889	0.657351
ENSG00000070159	PTPN3	protein tyrosine phosphatase, non-receptor type 3	-0.0294318	0.717773	0.92584
ENSG00000070182	SPTB	spectrin beta, erythrocytic	-0.184437	0.586188	0.876935
ENSG00000070190	DAPP1	dual adaptor of phosphotyrosine and 3-phosphoinositides 1	0.326425	0.257065	0.685647
ENSG00000070193	FGF10	fibroblast growth factor 10	-0.744736	0.536593
ENSG00000070214	SLC44A1	solute carrier family 44 member 1	-0.0715075	0.394918	0.782608
ENSG00000070269	TMEM260	transmembrane protein 260	0.125585	0.323131	0.734048
ENSG00000070366	SMG6	SMG6, nonsense mediated mRNA decay factor	0.0257849	0.702163	0.920909
ENSG00000070367	EXOC5	exocyst complex component 5	0.28766	0.0387269	0.324211
ENSG00000070371	CLTCL1	clathrin heavy chain like 1	-0.230498	0.0900376	0.47517
ENSG00000070388	FGF22	fibroblast growth factor 22	0.668117	0.557308
ENSG00000070404	FSTL3	follistatin like 3	0.239138	0.241829	0.672035
ENSG00000070413	DGCR2	DiGeorge syndrome critical region gene 2	-0.0400817	0.622278	0.889567
ENSG00000070423	RNF126	ring finger protein 126	-0.137378	0.298176	0.718265
ENSG00000070444	MNT	MAX network transcriptional repressor	-0.0724029	0.557379	0.861018
ENSG00000070476	ZXDC	ZXD family zinc finger C	0.0501277	0.5115	0.839725
ENSG00000070495	JMJD6	jumonji domain containing 6, arginine demethylase and lysine hydroxylase	0.0983505	0.430376	0.80219
ENSG00000070501	POLB	DNA polymerase beta	-0.148502	0.225111	0.655439
ENSG00000070526	ST6GALNAC1	ST6 N-acetylgalactosaminide alpha-2,6-sialyltransferase 1	-0.230036	0.641717	0.896348
ENSG00000070540	WIPI1	WD repeat domain, phosphoinositide interacting 1	0.184658	0.129809	0.545985
ENSG00000070601	FRMPD1	FERM and PDZ domain containing 1	0.775435	0.0200375	0.238603
ENSG00000070610	GBA2	glucosylceramidase beta 2	-0.0264936	0.753779	0.937729
ENSG00000070614	NDST1	N-deacetylase and N-sulfotransferase 1	-0.0579694	0.431127	0.802472
ENSG00000070669	ASNS	asparagine synthetase (glutamine-hydrolyzing)	0.0248263	0.945417	0.988104
ENSG00000070718	AP3M2	adaptor related protein complex 3 subunit mu 2	0.0992839	0.519588	0.843085
ENSG00000070729	CNGB1	cyclic nucleotide gated channel beta 1	1.45097	0.64009
ENSG00000070731	ST6GALNAC2	ST6 N-acetylgalactosaminide alpha-2,6-sialyltransferase 2	0.421309	0.165076	0.592542
ENSG00000070748	CHAT	choline O-acetyltransferase
ENSG00000070756	PABPC1	poly(A) binding protein cytoplasmic 1	-0.0913055	0.2441	0.674809
ENSG00000070759	TESK2	testis associated actin remodelling kinase 2	-0.273256	0.00755642	0.13931
ENSG00000070761	CFAP20	cilia and flagella associated protein 20	-0.0113148	0.875958	0.971601
ENSG00000070770	CSNK2A2	casein kinase 2 alpha 2	-0.0800662	0.27346	0.69605
ENSG00000070778	AL162171.1	protein tyrosine phosphatase, non-receptor type 21	-0.204112	0.0610085	0.40272
ENSG00000070785	EIF2B3	eukaryotic translation initiation factor 2B subunit gamma	0.0471745	0.613612	0.887507
ENSG00000070808	CAMK2A	calcium/calmodulin dependent protein kinase II alpha	-0.953208	0.032151	0.297744
ENSG00000070814	TCOF1	treacle ribosome biogenesis factor 1	0.0114245	0.903947	0.979028
ENSG00000070831	CDC42	cell division cycle 42	0.106599	0.0626343	0.406569
ENSG00000070882	OSBPL3	oxysterol binding protein like 3	0.365416	0.0668121	0.417568
ENSG00000070886	EPHA8	EPH receptor A8	-0.462488	0.795543
ENSG00000070915	SLC12A3	solute carrier family 12 member 3	0.0868361	0.946371
ENSG00000070950	RAD18	RAD18, E3 ubiquitin protein ligase	-0.0253038	0.798955	0.951767
ENSG00000070961	ATP2B1	ATPase plasma membrane Ca2+ transporting 1	0.0765423	0.565645	0.865893
ENSG00000070985	TRPM5	transient receptor potential cation channel subfamily M member 5
ENSG00000071051	NCK2	NCK adaptor protein 2	-0.0613384	0.528188	0.846263
ENSG00000071054	MAP4K4	mitogen-activated protein kinase kinase kinase kinase 4	0.104881	0.0788219	0.449596
ENSG00000071073	MGAT4A	alpha-1,3-mannosyl-glycoprotein 4-beta-N-acetylglucosaminyltransferase A	0.07978	0.516658	0.841258
ENSG00000071082	RPL31	ribosomal protein L31	-0.171044	0.0549093	0.385463
ENSG00000071127	WDR1	WD repeat domain 1	0.0105775	0.900076	0.97788
ENSG00000071189	SNX13	sorting nexin 13	0.130539	0.362369	0.762663
ENSG00000071203	AP001034.1	membrane spanning 4-domains A12	0	1
ENSG00000071205	ARHGAP10	Rho GTPase activating protein 10	-0.252527	0.257504	0.685957
ENSG00000071242	RPS6KA2	ribosomal protein S6 kinase A2	-0.223679	0.00986768	0.160899
ENSG00000071243	ING3	inhibitor of growth family member 3	-0.0403694	0.707802	0.922778
ENSG00000071246	VASH1	vasohibin 1	0.122324	0.443426	0.80705
ENSG00000071282	LMCD1	LIM and cysteine rich domains 1	-0.551483	0.0107706	0.169273
ENSG00000071462	BUD23	BUD23, rRNA methyltransferase and ribosome maturation factor	0.013308	0.89816	0.977395
ENSG00000071537	SEL1L	SEL1L, ERAD E3 ligase adaptor subunit	-0.0181068	0.824092	0.960019
ENSG00000071539	TRIP13	thyroid hormone receptor interactor 13	0.0718378	0.866502	0.969773
ENSG00000071553	ATP6AP1	ATPase H+ transporting accessory protein 1	-0.0567118	0.521753	0.843867
ENSG00000071564	TCF3	transcription factor 3	-0.0606818	0.530109	0.847219
ENSG00000071575	TRIB2	tribbles pseudokinase 2	-0.255717	0.0294861	0.285003
ENSG00000071626	DAZAP1	DAZ associated protein 1	-0.0352047	0.668993	0.907069
ENSG00000071655	MBD3	methyl-CpG binding domain protein 3	0.164594	0.279499	0.70269
ENSG00000071677	PRLH	prolactin releasing hormone
ENSG00000071794	HLTF	helicase like transcription factor	0.0793042	0.648393	0.899768
ENSG00000071859	FAM50A	family with sequence similarity 50 member A	-0.0454029	0.6963	0.918183
ENSG00000071889	FAM3A	family with sequence similarity 3 member A	-0.0541788	0.658102	0.904057
ENSG00000071894	CPSF1	cleavage and polyadenylation specific factor 1	-0.0405406	0.607847	0.885802
ENSG00000071909	MYO3B	myosin IIIB	-0.515579	0.6981
ENSG00000071967	CYBRD1	cytochrome b reductase 1	-0.187315	0.237922	0.668542
ENSG00000071991	CDH19	cadherin 19	-0.439382	0.100179	0.499292
ENSG00000071994	PDCD2	programmed cell death 2	-0.0148335	0.825473	0.960403
ENSG00000072041	SLC6A15	solute carrier family 6 member 15
ENSG00000072042	RDH11	retinol dehydrogenase 11	0.159672	0.384473	0.777977
ENSG00000072062	PRKACA	protein kinase cAMP-activated catalytic subunit alpha	-0.0837322	0.240162	0.670876
ENSG00000072071	ADGRL1	adhesion G protein-coupled receptor L1	-0.193442	0.228437	0.658321
ENSG00000072080	SPP2	secreted phosphoprotein 2	-0.126963	0.277173	0.700257
ENSG00000072110	ACTN1	actinin alpha 1	-0.089638	0.398061	0.783948
ENSG00000072121	ZFYVE26	zinc finger FYVE-type containing 26	0.0840232	0.318178	0.730464
ENSG00000072133	RPS6KA6	ribosomal protein S6 kinase A6	-0.282765	0.246314	0.677083
ENSG00000072134	EPN2	epsin 2	-0.151664	0.302138	0.721976
ENSG00000072135	PTPN18	protein tyrosine phosphatase, non-receptor type 18	-0.0399455	0.613687	0.887507
ENSG00000072163	LIMS2	LIM zinc finger domain containing 2	-0.0576061	0.651924	0.901068
ENSG00000072182	ASIC4	acid sensing ion channel subunit family member 4
ENSG00000072195	SPEG	striated muscle enriched protein kinase	-0.105406	0.833651	0.962335
ENSG00000072201	LNX1	ligand of numb-protein X 1	0.119523	0.435506	0.803389
ENSG00000072210	ALDH3A2	aldehyde dehydrogenase 3 family member A2	-0.247915	0.00764775	0.139363
ENSG00000072274	TFRC	transferrin receptor	-0.345134	0.310165	0.72566
ENSG00000072310	SREBF1	sterol regulatory element binding transcription factor 1	0.723246	0.000215612	0.0158372
ENSG00000072315	TRPC5	transient receptor potential cation channel subfamily C member 5	-0.0683939	0.739508	0.934243
ENSG00000072364	AFF4	AF4/FMR2 family member 4	0.00476385	0.978067	0.996198
ENSG00000072401	UBE2D1	ubiquitin conjugating enzyme E2 D1	0.0633803	0.67838	0.912616
ENSG00000072415	MPP5	membrane palmitoylated protein 5	0.0165273	0.886197	0.974581
ENSG00000072422	RHOBTB1	Rho related BTB domain containing 1	0.00989598	0.936467	0.985971
ENSG00000072501	SMC1A	structural maintenance of chromosomes 1A	0.0561628	0.516838	0.841258
ENSG00000072506	HSD17B10	hydroxysteroid 17-beta dehydrogenase 10	-0.0286128	0.815388	0.957149
ENSG00000072518	MARK2	microtubule affinity regulating kinase 2	0.175524	0.0352194	0.308945
ENSG00000072571	HMMR	hyaluronan mediated motility receptor	-0.0986716	0.806418	0.954008
ENSG00000072609	CHFR	checkpoint with forkhead and ring finger domains	0.208294	0.0519715	0.375422
ENSG00000072657	TRHDE	thyrotropin releasing hormone degrading enzyme	0.639485	0.156729	0.58213
ENSG00000072682	P4HA2	prolyl 4-hydroxylase subunit alpha 2	0.0839174	0.615683	0.888202
ENSG00000072694	FCGR2B	Fc fragment of IgG receptor IIb	0.0422587	0.767161	0.941811
ENSG00000072736	NFATC3	nuclear factor of activated T cells 3	-0.288985	0.00114517	0.0471447
ENSG00000072756	TRNT1	tRNA nucleotidyl transferase 1	0.228167	0.0931216	0.482102
ENSG00000072778	ACADVL	acyl-CoA dehydrogenase very long chain	-0.133947	0.201414	0.635096
ENSG00000072786	STK10	serine/threonine kinase 10	0.195511	0.133754	0.551127
ENSG00000072803	FBXW11	F-box and WD repeat domain containing 11	0.00597776	0.922579	0.982992
ENSG00000072818	ACAP1	ArfGAP with coiled-coil, ankyrin repeat and PH domains 1	0.329583	0.149303	0.571026
ENSG00000072832	CRMP1	collapsin response mediator protein 1	0.9921	0.255157
ENSG00000072840	EVC	EvC ciliary complex subunit 1	-0.550505	0.0243086	0.263189
ENSG00000072849	DERL2	derlin 2	0.150505	0.0433408	0.344456
ENSG00000072858	SIDT1	SID1 transmembrane family member 1	0.260804	0.295523	0.715454
ENSG00000072864	NDE1	nudE neurodevelopment protein 1	0.0773396	0.602916	0.885003
ENSG00000072952	MRVI1	murine retrovirus integration site 1 homolog	0.0298282	0.882366	0.973237
ENSG00000072954	TMEM38A	transmembrane protein 38A	-0.278462	0.0436177	0.345388
ENSG00000072958	AP1M1	adaptor related protein complex 1 subunit mu 1	-0.0281238	0.764627	0.941266
ENSG00000073008	PVR	poliovirus receptor	0.0663737	0.492669	0.831221
ENSG00000073050	XRCC1	X-ray repair cross complementing 1	-0.140143	0.267944	0.692101
ENSG00000073060	SCARB1	scavenger receptor class B member 1	0.111887	0.278821	0.701628
ENSG00000073067	CYP2W1	cytochrome P450 family 2 subfamily W member 1	0.421867	0.856069
ENSG00000073111	MCM2	minichromosome maintenance complex component 2	0.261478	0.218213	0.649726
ENSG00000073146	MOV10L1	Mov10 like RISC complex RNA helicase 1	-1.37907	0.000547282	0.0301766
ENSG00000073150	PANX2	pannexin 2	-0.776047	0.000378225	0.0225577
ENSG00000073169	SELENOO	selenoprotein O	-0.0831395	0.483384	0.826122
ENSG00000073282	TP63	tumor protein p63	1.14199	0.0325193	0.298775
ENSG00000073331	ALPK1	alpha kinase 1	-0.00671659	0.959533	0.990942
ENSG00000073350	LLGL2	LLGL scribble cell polarity complex component 2	0.0969521	0.333198	0.742605
ENSG00000073417	PDE8A	phosphodiesterase 8A	-0.140227	0.137016	0.553635
ENSG00000073464	CLCN4	chloride voltage-gated channel 4	-0.172889	0.0624395	0.406253
ENSG00000073536	NLE1	notchless homolog 1	-0.0202	0.840794	0.963571
ENSG00000073578	SDHA	succinate dehydrogenase complex flavoprotein subunit A	-0.172877	0.0151196	0.204466
ENSG00000073584	SMARCE1	SWI/SNF related, matrix associated, actin dependent regulator of chromatin, subfamily e, member 1	0.0970792	0.193118	0.625324
ENSG00000073598	FNDC8	fibronectin type III domain containing 8	0.61422	0.843319
ENSG00000073605	GSDMB	gasdermin B	0.0648099	0.899838	0.97788
ENSG00000073614	KDM5A	lysine demethylase 5A	0.171413	0.0208182	0.243315
ENSG00000073670	ADAM11	ADAM metallopeptidase domain 11	-0.474876	0.555777
ENSG00000073711	PPP2R3A	protein phosphatase 2 regulatory subunit B''alpha	0.00445398	0.982411	0.99711
ENSG00000073712	FERMT2	fermitin family member 2	-0.134733	0.22074	0.649992
ENSG00000073734	ABCB11	ATP binding cassette subfamily B member 11	-0.231465	0.1287	0.54355
ENSG00000073737	DHRS9	dehydrogenase/reductase 9	0.373719	0.180917	0.61178
ENSG00000073754	CD5L	CD5 molecule like	0.176929	0.350608	0.753594
ENSG00000073756	PTGS2	prostaglandin-endoperoxide synthase 2	0.571841	0.261882	0.689831
ENSG00000073792	IGF2BP2	insulin like growth factor 2 mRNA binding protein 2	0.0258866	0.877233	0.971717
ENSG00000073803	MAP3K13	mitogen-activated protein kinase kinase kinase 13	-0.0342044	0.781097	0.945984
ENSG00000073849	ST6GAL1	ST6 beta-galactoside alpha-2,6-sialyltransferase 1	-0.148872	0.0144011	0.19937
ENSG00000073861	TBX21	T-box 21	0.422802	0.0975645	0.494125
ENSG00000073910	FRY	FRY microtubule binding protein	0.313247	0.0040705	0.0993146
ENSG00000073921	PICALM	phosphatidylinositol binding clathrin assembly protein	0.0365017	0.655193	0.902729
ENSG00000073969	NSF	N-ethylmaleimide sensitive factor, vesicle fusing ATPase	0.185036	0.0424129	0.340965
ENSG00000074047	GLI2	GLI family zinc finger 2	-0.421629	0.322773	0.733999
ENSG00000074054	CLASP1	cytoplasmic linker associated protein 1	-0.0937349	0.305654	0.723
ENSG00000074071	MRPS34	mitochondrial ribosomal protein S34	-0.0845186	0.492489	0.831197
ENSG00000074181	NOTCH3	notch 3	-0.245192	0.287781	0.709464
ENSG00000074201	CLNS1A	chloride nucleotide-sensitive channel 1A	0.0486958	0.522524	0.844458
ENSG00000074211	PPP2R2C	protein phosphatase 2 regulatory subunit Bgamma	-0.964148	0.41403
ENSG00000074219	TEAD2	TEA domain transcription factor 2	-0.0498506	0.685141	0.913467
ENSG00000074266	EED	embryonic ectoderm development	0.0356575	0.754308	0.938079
ENSG00000074276	CDHR2	cadherin related family member 2	0.152892	0.465278	0.818049
ENSG00000074317	SNCB	synuclein beta	-1.33986	0.580372
ENSG00000074319	TSG101	tumor susceptibility 101	0.00705106	0.913041	0.981741
ENSG00000074356	NCBP3	nuclear cap binding subunit 3	-0.0502883	0.530203	0.847219
ENSG00000074370	ATP2A3	ATPase sarcoplasmic/endoplasmic reticulum Ca2+ transporting 3	0.0532302	0.730877	0.931773
ENSG00000074410	CA12	carbonic anhydrase 12	-0.859544	0.194022	0.626545
ENSG00000074416	MGLL	monoglyceride lipase	0.229223	0.0228316	0.255319
ENSG00000074527	NTN4	netrin 4	0.080273	0.543061	0.853592
ENSG00000074582	BCS1L	BCS1 homolog, ubiquinol-cytochrome c reductase complex chaperone	-0.203388	0.0503601	0.37108
ENSG00000074590	NUAK1	NUAK family kinase 1	0.167006	0.159488	0.584662
ENSG00000074603	DPP8	dipeptidyl peptidase 8	0.065178	0.608602	0.885802
ENSG00000074621	SLC24A1	solute carrier family 24 member 1	-0.0102895	0.933609	0.985403
ENSG00000074657	ZNF532	zinc finger protein 532	-0.0288842	0.867166	0.969846
ENSG00000074660	SCARF1	scavenger receptor class F member 1	0.235324	0.100755	0.501302
ENSG00000074695	LMAN1	lectin, mannose binding 1	0.0885292	0.459046	0.815069
ENSG00000074696	HACD3	3-hydroxyacyl-CoA dehydratase 3	-0.0280965	0.710409	0.923651
ENSG00000074706	IPCEF1	interaction protein for cytohesin exchange factors 1	0.0484681	0.791418	0.950355
ENSG00000074755	ZZEF1	zinc finger ZZ-type and EF-hand domain containing 1	0.00752298	0.91557	0.982082
ENSG00000074771	NOX3	NADPH oxidase 3
ENSG00000074800	ENO1	enolase 1	-0.0641515	0.61929	0.889076
ENSG00000074803	SLC12A1	solute carrier family 12 member 1	0.555134	0.413829
ENSG00000074842	MYDGF	myeloid derived growth factor	0.02571	0.81437	0.956879
ENSG00000074855	ANO8	anoctamin 8	0.095122	0.566486	0.866118
ENSG00000074935	TUBE1	tubulin epsilon 1	-0.000302956	0.998507	0.999509
ENSG00000074964	ARHGEF10L	Rho guanine nucleotide exchange factor 10 like	0.134723	0.391457	0.781212
ENSG00000074966	TXK	TXK tyrosine kinase	0.140908	0.60408	0.885003
ENSG00000075035	WSCD2	WSC domain containing 2	-0.61621	0.662422
ENSG00000075043	KCNQ2	potassium voltage-gated channel subfamily Q member 2	-0.116739	0.970034
ENSG00000075073	TACR2	tachykinin receptor 2	0.641812	0.170694	0.599781
ENSG00000075089	ACTR6	ARP6 actin related protein 6 homolog	-0.0833238	0.497841	0.83379
ENSG00000075131	TIPIN	TIMELESS interacting protein	-0.228323	0.280666	0.703734
ENSG00000075142	SRI	sorcin	0.0780871	0.501134	0.834586
ENSG00000075151	EIF4G3	eukaryotic translation initiation factor 4 gamma 3	0.12563	0.338403	0.746534
ENSG00000075188	NUP37	nucleoporin 37	0.0253742	0.833354	0.962323
ENSG00000075213	SEMA3A	semaphorin 3A	-0.874435	0.129934
ENSG00000075218	GTSE1	G2 and S-phase expressed 1	0.603808	0.222065
ENSG00000075223	SEMA3C	semaphorin 3C	-1.06555	0.108388	0.515389
ENSG00000075234	TTC38	tetratricopeptide repeat domain 38	-0.209126	0.0794997	0.451501
ENSG00000075239	ACAT1	acetyl-CoA acetyltransferase 1	0.284062	0.00191183	0.0638314
ENSG00000075240	GRAMD4	GRAM domain containing 4	-0.182996	0.199552	0.632014
ENSG00000075275	CELSR1	cadherin EGF LAG seven-pass G-type receptor 1	-0.124025	0.505923	0.836441
ENSG00000075290	WNT8B	Wnt family member 8B	0.0444026	0.974621
ENSG00000075292	ZNF638	zinc finger protein 638	0.0487082	0.629309	0.893391
ENSG00000075303	SLC25A40	solute carrier family 25 member 40	-0.128636	0.308538	0.724154
ENSG00000075336	TIMM21	translocase of inner mitochondrial membrane 21	-0.113783	0.1723	0.601719
ENSG00000075340	ADD2	adducin 2	0.947029	0.0387767	0.324247
ENSG00000075388	FGF4	fibroblast growth factor 4
ENSG00000075391	RASAL2	RAS protein activator like 2	0.30111	0.0625318	0.406546
ENSG00000075399	VPS9D1	VPS9 domain containing 1	0.0348018	0.794332	0.951329
ENSG00000075407	ZNF37A	zinc finger protein 37A	0.0797381	0.558818	0.861753
ENSG00000075413	MARK3	microtubule affinity regulating kinase 3	-0.00316414	0.963746	0.991775
ENSG00000075415	SLC25A3	solute carrier family 25 member 3	-0.037638	0.514695	0.840056
ENSG00000075420	FNDC3B	fibronectin type III domain containing 3B	-0.0531057	0.623083	0.890128
ENSG00000075426	FOSL2	FOS like 2, AP-1 transcription factor subunit	-0.0783133	0.489434	0.828948
ENSG00000075429	CACNG5	calcium voltage-gated channel auxiliary subunit gamma 5	0.61422	0.843319
ENSG00000075461	CACNG4	calcium voltage-gated channel auxiliary subunit gamma 4	-0.0782838	0.932401
ENSG00000075539	FRYL	FRY like transcription coactivator	0.133156	0.39336	0.782608
ENSG00000075568	TMEM131	transmembrane protein 131	0.0496327	0.646019	0.898934
ENSG00000075618	FSCN1	fascin actin-bundling protein 1	0.0693766	0.654139	0.902269
ENSG00000075624	ACTB	actin beta	0.0172341	0.889674	0.974744
ENSG00000075643	MOCOS	molybdenum cofactor sulfurase	0.077498	0.517984	0.842258
ENSG00000075651	PLD1	phospholipase D1	-0.0484606	0.611281	0.886697
ENSG00000075673	ATP12A	ATPase H+/K+ transporting non-gastric alpha2 subunit	-1.70301	0.0860692
ENSG00000075702	WDR62	WD repeat domain 62	0.393825	0.179333	0.609697
ENSG00000075711	DLG1	discs large MAGUK scaffold protein 1	0.018472	0.850713	0.965764
ENSG00000075785	RAB7A	RAB7A, member RAS oncogene family	-0.0401823	0.471609	0.821001
ENSG00000075790	BCAP29	B cell receptor associated protein 29	0.272114	0.0132113	0.190981
ENSG00000075826	SEC31B	SEC31 homolog B, COPII coat complex component	0.676742	0.166417	0.594448
ENSG00000075856	SART3	spliceosome associated factor 3, U4/U6 recycling protein	0.00702119	0.903103	0.978884
ENSG00000075884	ARHGAP15	Rho GTPase activating protein 15	-0.124262	0.42391	0.797602
ENSG00000075886	TUBA3D	tubulin alpha 3d	-0.571096	0.644467
ENSG00000075891	PAX2	paired box 2	-0.435727	0.828514
ENSG00000075914	EXOSC7	exosome component 7	-0.152915	0.14169	0.561366
ENSG00000075945	KIFAP3	kinesin associated protein 3	0.0315235	0.717634	0.92584
ENSG00000075975	MKRN2	makorin ring finger protein 2	-0.0309389	0.649402	0.900061
ENSG00000076003	MCM6	minichromosome maintenance complex component 6	0.145569	0.345808	0.75124
ENSG00000076043	REXO2	RNA exonuclease 2	-0.0899689	0.387578	0.780126
ENSG00000076053	RBM7	RNA binding motif protein 7	-0.134462	0.345019	0.750967
ENSG00000076067	RBMS2	RNA binding motif single stranded interacting protein 2	-0.0595579	0.501556	0.834793
ENSG00000076108	BAZ2A	bromodomain adjacent to zinc finger domain 2A	0.0187039	0.82014	0.958777
ENSG00000076201	PTPN23	protein tyrosine phosphatase, non-receptor type 23	0.0404802	0.72383	0.928919
ENSG00000076242	MLH1	mutL homolog 1	0.0302991	0.698826	0.919903
ENSG00000076248	UNG	uracil DNA glycosylase	-0.107558	0.366859	0.76599
ENSG00000076258	FMO4	flavin containing monooxygenase 4	-0.427261	0.00171347	0.0599328
ENSG00000076321	KLHL20	kelch like family member 20	-0.0010485	0.993464	0.99876
ENSG00000076344	RGS11	regulator of G protein signaling 11	-0.0343708	0.92739	0.984976
ENSG00000076351	SLC46A1	solute carrier family 46 member 1	-0.0220365	0.812032	0.955906
ENSG00000076356	PLXNA2	plexin A2	-0.301088	0.00590564	0.123256
ENSG00000076382	SPAG5	sperm associated antigen 5	0.0838895	0.518206	0.842306
ENSG00000076513	ANKRD13A	ankyrin repeat domain 13A	0.132135	0.0675201	0.420395
ENSG00000076554	TPD52	tumor protein D52	0.270687	0.0339705	0.305079
ENSG00000076555	ACACB	acetyl-CoA carboxylase beta	0.199284	0.0301953	0.288449
ENSG00000076604	TRAF4	TNF receptor associated factor 4	-0.0230499	0.843095	0.963571
ENSG00000076641	PAG1	phosphoprotein membrane anchor with glycosphingolipid microdomains 1	0.201552	0.235259	0.666551
ENSG00000076650	GPATCH1	G-patch domain containing 1	-0.0475605	0.723232	0.928894
ENSG00000076662	ICAM3	intercellular adhesion molecule 3	-0.276539	0.102922	0.506123
ENSG00000076685	NT5C2	5'-nucleotidase, cytosolic II	0.0687777	0.488595	0.828735
ENSG00000076706	AP002956.1	melanoma cell adhesion molecule	-0.353576	0.135858	0.553635
ENSG00000076716	GPC4	glypican 4	-0.454615	0.0833577	0.461094
ENSG00000076770	MBNL3	muscleblind like splicing regulator 3	-0.183653	0.254369	0.682782
ENSG00000076826	CAMSAP3	calmodulin regulated spectrin associated protein family member 3	0.0202178	0.856764	0.966411
ENSG00000076864	RAP1GAP	RAP1 GTPase activating protein	0.0138948	0.947127	0.988226
ENSG00000076924	XAB2	XPA binding protein 2	-0.260536	0.0144142	0.19937
ENSG00000076928	ARHGEF1	Rho guanine nucleotide exchange factor 1	0.00452689	0.959278	0.990942
ENSG00000076944	STXBP2	syntaxin binding protein 2	-0.0706409	0.563257	0.864529
ENSG00000076984	MAP2K7	mitogen-activated protein kinase kinase 7	-0.200618	0.072112	0.431004
ENSG00000077009	NMRK2	nicotinamide riboside kinase 2	-0.318853	0.867195
ENSG00000077044	DGKD	diacylglycerol kinase delta	-0.0296157	0.699575	0.920114
ENSG00000077063	CTTNBP2	cortactin binding protein 2	0.330361	0.0976751	0.494125
ENSG00000077080	ACTL6B	actin like 6B
ENSG00000077092	RARB	retinoic acid receptor beta	0.101798	0.567487	0.866327
ENSG00000077097	TOP2B	DNA topoisomerase II beta	0.0585936	0.572922	0.869729
ENSG00000077147	TM9SF3	transmembrane 9 superfamily member 3	0.138435	0.0567552	0.390882
ENSG00000077150	NFKB2	nuclear factor kappa B subunit 2	0.24372	0.110076	0.517917
ENSG00000077152	UBE2T	ubiquitin conjugating enzyme E2 T	0.245643	0.4799	0.825264
ENSG00000077157	PPP1R12B	protein phosphatase 1 regulatory subunit 12B	-0.0175607	0.918251	0.982201
ENSG00000077232	DNAJC10	DnaJ heat shock protein family (Hsp40) member C10	0.145562	0.0596967	0.399738
ENSG00000077235	GTF3C1	general transcription factor IIIC subunit 1	0.0602815	0.431406	0.802472
ENSG00000077238	IL4R	interleukin 4 receptor	0.0897253	0.551075	0.857678
ENSG00000077254	USP33	ubiquitin specific peptidase 33	0.0331478	0.632968	0.894241
ENSG00000077264	PAK3	p21 (RAC1) activated kinase 3	0.610804	0.30243
ENSG00000077274	CAPN6	calpain 6	-0.840862	0.0293006	0.284367
ENSG00000077279	DCX	doublecortin	1.90461	0.504605
ENSG00000077312	SNRPA	small nuclear ribonucleoprotein polypeptide A	-0.0822597	0.436622	0.803421
ENSG00000077327	SPAG6	sperm associated antigen 6	-0.116739	0.970034
ENSG00000077348	EXOSC5	exosome component 5	-0.0595937	0.697311	0.918516
ENSG00000077380	DYNC1I2	dynein cytoplasmic 1 intermediate chain 2	0.0346405	0.59382	0.880135
ENSG00000077420	APBB1IP	amyloid beta precursor protein binding family B member 1 interacting protein	0.48871	0.0139079	0.195467
ENSG00000077454	LRCH4	leucine rich repeats and calponin homology domain containing 4	-0.164974	0.21533	0.64864
ENSG00000077458	FAM76B	family with sequence similarity 76 member B	0.0416671	0.862917	0.968933
ENSG00000077463	SIRT6	sirtuin 6	-0.0357888	0.77589	0.944442
ENSG00000077498	TYR	tyrosinase
ENSG00000077514	POLD3	DNA polymerase delta 3, accessory subunit	0.197955	0.116727	0.526805
ENSG00000077522	ACTN2	actinin alpha 2	0.673363	0.271791	0.694734
ENSG00000077549	CAPZB	capping actin protein of muscle Z-line subunit beta	0.0276366	0.759986	0.940682
ENSG00000077585	GPR137B	G protein-coupled receptor 137B	-0.419037	0.00141477	0.0538
ENSG00000077616	NAALAD2	N-acetylated alpha-linked acidic dipeptidase 2	-0.119602	0.658155	0.904057
ENSG00000077684	JADE1	jade family PHD finger 1	0.0099177	0.921768	0.982861
ENSG00000077713	SLC25A43	solute carrier family 25 member 43	-0.00906674	0.951445	0.988753
ENSG00000077721	UBE2A	ubiquitin conjugating enzyme E2 A	0.185338	0.0110995	0.172116
ENSG00000077782	FGFR1	fibroblast growth factor receptor 1	-0.155653	0.296013	0.715778
ENSG00000077800	FKBP6	FKBP prolyl isomerase 6
ENSG00000077935	SMC1B	structural maintenance of chromosomes 1B	-0.852214	0.645278
ENSG00000077942	FBLN1	fibulin 1	-0.127889	0.635898	0.894989
ENSG00000077943	ITGA8	integrin subunit alpha 8	-0.0474814	0.926312	0.984677
ENSG00000077984	CST7	cystatin F	0.34443	0.111817	0.518877
ENSG00000078018	MAP2	microtubule associated protein 2	-0.103282	0.611653	0.886697
ENSG00000078043	PIAS2	protein inhibitor of activated STAT 2	-0.01525	0.908503	0.979864
ENSG00000078053	AMPH	amphiphysin	-0.0858638	0.804762	0.953337
ENSG00000078061	ARAF	A-Raf proto-oncogene, serine/threonine kinase	-0.0750329	0.460637	0.815436
ENSG00000078070	MCCC1	methylcrotonoyl-CoA carboxylase 1	-0.0778035	0.469481	0.820137
ENSG00000078081	LAMP3	lysosomal associated membrane protein 3	1.00586	0.00831779	0.146691
ENSG00000078098	FAP	fibroblast activation protein alpha	1.67649	0.167159
ENSG00000078114	NEBL	nebulette	0.831226	8.37983e-06	0.00211712
ENSG00000078124	ACER3	alkaline ceramidase 3	0.367813	0.0153701	0.206817
ENSG00000078140	UBE2K	ubiquitin conjugating enzyme E2 K	0.174043	0.0919915	0.480026
ENSG00000078142	PIK3C3	phosphatidylinositol 3-kinase catalytic subunit type 3	0.0153555	0.819798	0.958761
ENSG00000078177	N4BP2	NEDD4 binding protein 2	0.0502446	0.784984	0.947193
ENSG00000078237	TIGAR	TP53 induced glycolysis regulatory phosphatase	0.713243	0.0327431	0.299218
ENSG00000078246	TULP3	tubby like protein 3	-0.028562	0.779672	0.945787
ENSG00000078269	SYNJ2	synaptojanin 2	0.03369	0.772404	0.943407
ENSG00000078295	ADCY2	adenylate cyclase 2	-1.07352	0.465895
ENSG00000078304	PPP2R5C	protein phosphatase 2 regulatory subunit B'gamma	-0.139805	0.036873	0.316653
ENSG00000078328	RBFOX1	RNA binding fox-1 homolog 1	0.0756188	0.980587
ENSG00000078369	GNB1	G protein subunit beta 1	0.0226958	0.535167	0.849595
ENSG00000078399	HOXA9	homeobox A9	0.0359019	0.977695
ENSG00000078401	EDN1	endothelin 1	-0.308995	0.412643	0.79203
ENSG00000078403	MLLT10	MLLT10, histone lysine methyltransferase DOT1L cofactor	0.0106554	0.936899	0.98604
ENSG00000078487	ZCWPW1	zinc finger CW-type and PWWP domain containing 1	-0.241316	0.112597	0.519904
ENSG00000078549	ADCYAP1R1	ADCYAP receptor type I	-2.11021	0.000642239	0.0336101
ENSG00000078579	FGF20	fibroblast growth factor 20	-0.941041	0.761946
ENSG00000078589	P2RY10	P2Y receptor family member 10	0.277647	0.34976	0.753528
ENSG00000078596	ITM2A	integral membrane protein 2A	0.155977	0.537929	0.851071
ENSG00000078618	NRDC	nardilysin convertase	-0.0588481	0.441828	0.806032
ENSG00000078668	VDAC3	voltage dependent anion channel 3	-0.0162381	0.848298	0.965176
ENSG00000078674	PCM1	pericentriolar material 1	0.11584	0.145332	0.567247
ENSG00000078687	TNRC6C	trinucleotide repeat containing 6C	-0.308758	0.0325863	0.298845
ENSG00000078699	CBFA2T2	CBFA2/RUNX1 translocation partner 2	0.024314	0.827742	0.960695
ENSG00000078725	BRINP1	BMP/retinoic acid inducible neural specific 1	0.0466026	0.896528	0.977301
ENSG00000078747	ITCH	itchy E3 ubiquitin protein ligase	-0.105074	0.455924	0.813637
ENSG00000078795	PKD2L2	polycystin 2 like 2, transient receptor potential cation channel	-0.411052	0.891869
ENSG00000078804	TP53INP2	tumor protein p53 inducible nuclear protein 2	0.353419	0.00639594	0.127571
ENSG00000078808	SDF4	stromal cell derived factor 4	-0.00133502	0.989715	0.998487
ENSG00000078814	MYH7B	myosin heavy chain 7B	-0.298529	0.19001	0.622112
ENSG00000078898	BPIFB2	BPI fold containing family B member 2	0.0765373	0.924179
ENSG00000078900	TP73	tumor protein p73	0.617702	0.403786
ENSG00000078902	TOLLIP	toll interacting protein	0.0893034	0.33561	0.744592
ENSG00000078967	UBE2D4	ubiquitin conjugating enzyme E2 D4 (putative)	-0.113654	0.119123	0.52998
ENSG00000079101	CLUL1	clusterin like 1	-1.16171	0.343501
ENSG00000079102	RUNX1T1	RUNX1 translocation partner 1	-0.192448	0.385282	0.778396
ENSG00000079112	CDH17	cadherin 17	-1.48043	0.0467031	0.357929
ENSG00000079134	THOC1	THO complex 1	0.0587501	0.654042	0.902225
ENSG00000079150	FKBP7	FKBP prolyl isomerase 7	-0.079343	0.591107	0.879244
ENSG00000079156	OSBPL6	oxysterol binding protein like 6	-0.325705	0.117665	0.527969
ENSG00000079215	SLC1A3	solute carrier family 1 member 3	0.377391	0.0884721	0.471806
ENSG00000079246	XRCC5	X-ray repair cross complementing 5	-0.0559054	0.585874	0.876926
ENSG00000079257	LXN	latexin	0.0634273	0.761104	0.940682
ENSG00000079263	SP140	SP140 nuclear body protein	0.13188	0.629439	0.893391
ENSG00000079277	MKNK1	MAP kinase interacting serine/threonine kinase 1	0.041718	0.591825	0.879244
ENSG00000079308	TNS1	tensin 1	0.168993	0.026228	0.27235
ENSG00000079313	REXO1	RNA exonuclease 1 homolog	-0.0589388	0.590817	0.879244
ENSG00000079332	SAR1A	secretion associated Ras related GTPase 1A	0.0630183	0.485373	0.827494
ENSG00000079335	CDC14A	cell division cycle 14A	0.0603143	0.819182	0.958737
ENSG00000079337	RAPGEF3	Rap guanine nucleotide exchange factor 3	-0.162004	0.390772	0.781078
ENSG00000079385	CEACAM1	carcinoembryonic antigen related cell adhesion molecule 1	-0.258798	0.000337008	0.0207193
ENSG00000079387	SENP1	SUMO specific peptidase 1	0.0394364	0.742327	0.934983
ENSG00000079393	DUSP13	dual specificity phosphatase 13	-0.196395	0.942841
ENSG00000079432	CIC	capicua transcriptional repressor	0.0468982	0.733221	0.932506
ENSG00000079435	LIPE	lipase E, hormone sensitive type	-0.168224	0.482931	0.825806
ENSG00000079459	FDFT1	farnesyl-diphosphate farnesyltransferase 1	-0.0120564	0.93469	0.985403
ENSG00000079462	PAFAH1B3	platelet activating factor acetylhydrolase 1b catalytic subunit 3	-0.0644565	0.735772	0.932525
ENSG00000079482	OPHN1	oligophrenin 1	0.700868	0.000130062	0.0113891
ENSG00000079557	AFM	afamin	0.11822	0.273662	0.69605
ENSG00000079616	KIF22	kinesin family member 22	0.04029	0.720428	0.927433
ENSG00000079689	SCGN	secretagogin, EF-hand calcium binding protein	-0.35518	0.252711	0.681571
ENSG00000079691	CARMIL1	capping protein regulator and myosin 1 linker 1	0.301596	0.0538854	0.381932
ENSG00000079739	PGM1	phosphoglucomutase 1	-0.164272	0.0175427	0.222566
ENSG00000079785	DDX1	DEAD-box helicase 1	-0.0362079	0.582634	0.875927
ENSG00000079805	DNM2	dynamin 2	0.0549962	0.50088	0.834409
ENSG00000079819	EPB41L2	erythrocyte membrane protein band 4.1 like 2	0.14887	0.27045	0.693315
ENSG00000079841	RIMS1	regulating synaptic membrane exocytosis 1	-0.270625	0.930605
ENSG00000079931	MOXD1	monooxygenase DBH like 1	-0.49407	0.155806	0.581357
ENSG00000079950	STX7	syntaxin 7	0.0859249	0.338541	0.746534
ENSG00000079974	RABL2B	RAB, member of RAS oncogene family like 2B	-0.135424	0.441652	0.805817
ENSG00000079999	KEAP1	kelch like ECH associated protein 1	0.0622723	0.484862	0.827252
ENSG00000080007	DDX43	DEAD-box helicase 43	-0.482397	0.291548	0.712857
ENSG00000080031	PTPRH	protein tyrosine phosphatase, receptor type H	-0.667983	0.00213687	0.0684571
ENSG00000080166	DCT	dopachrome tautomerase	-1.06382	0.248661
ENSG00000080189	SLC35C2	solute carrier family 35 member C2	-0.193453	0.0220334	0.24976
ENSG00000080200	CRYBG3	crystallin beta-gamma domain containing 3	0.435395	0.0031881	0.0853994
ENSG00000080224	EPHA6	EPH receptor A6	-0.766381	0.657978
ENSG00000080293	SCTR	secretin receptor	0.201945	0.835171
ENSG00000080298	RFX3	regulatory factor X3	-0.139517	0.471245	0.820911
ENSG00000080345	RIF1	replication timing regulatory factor 1	0.168693	0.217164	0.649308
ENSG00000080371	RAB21	RAB21, member RAS oncogene family	0.175234	0.155422	0.580898
ENSG00000080493	SLC4A4	solute carrier family 4 member 4	-0.0371502	0.820399	0.958946
ENSG00000080503	SMARCA2	SWI/SNF related, matrix associated, actin dependent regulator of chromatin, subfamily a, member 2	0.0635329	0.462599	0.81598
ENSG00000080511	RDH8	retinol dehydrogenase 8
ENSG00000080546	SESN1	sestrin 1	-0.0175822	0.867048	0.969846
ENSG00000080561	MID2	midline 2	-0.103644	0.42622	0.798948
ENSG00000080572	PIH1D3	PIH1 domain containing 3
ENSG00000080573	COL5A3	collagen type V alpha 3 chain	1.03116	0.0294336	0.284865
ENSG00000080603	SRCAP	Snf2 related CREBBP activator protein	0.0318996	0.848733	0.965264
ENSG00000080608	PUM3	pumilio RNA binding family member 3	0.0186618	0.839167	0.963263
ENSG00000080618	CPB2	carboxypeptidase B2	-0.0774879	0.340819	0.747716
ENSG00000080644	CHRNA3	cholinergic receptor nicotinic alpha 3 subunit
ENSG00000080709	KCNN2	potassium calcium-activated channel subfamily N member 2	-0.196251	0.0887095	0.47181
ENSG00000080802	CNOT4	CCR4-NOT transcription complex subunit 4	0.0103429	0.901817	0.978294
ENSG00000080815	PSEN1	presenilin 1	-0.0120858	0.850187	0.965515
ENSG00000080819	CPOX	coproporphyrinogen oxidase	-0.0386381	0.814649	0.957007
ENSG00000080822	CLDND1	claudin domain containing 1	-0.128477	0.0771181	0.444248
ENSG00000080823	MOK	MOK protein kinase	0.0582508	0.766675	0.941686
ENSG00000080824	HSP90AA1	heat shock protein 90 alpha family class A member 1	-0.0665437	0.6176	0.888745
ENSG00000080839	RBL1	RB transcriptional corepressor like 1	0.0935758	0.59781	0.882345
ENSG00000080845	DLGAP4	DLG associated protein 4	-0.0392368	0.595607	0.881281
ENSG00000080854	IGSF9B	immunoglobulin superfamily member 9B	-0.221451	0.886538
ENSG00000080910	CFHR2	complement factor H related 2	0.286622	0.710722
ENSG00000080986	NDC80	NDC80, kinetochore complex component	0.0286429	0.954127	0.989419
ENSG00000081014	AP4E1	adaptor related protein complex 4 subunit epsilon 1	0.241817	0.110387	0.517917
ENSG00000081019	RSBN1	round spermatid basic protein 1	-0.0679338	0.608523	0.885802
ENSG00000081026	MAGI3	membrane associated guanylate kinase, WW and PDZ domain containing 3	-0.121653	0.337841	0.746534
ENSG00000081041	CXCL2	C-X-C motif chemokine ligand 2	-0.438656	0.099633	0.498015
ENSG00000081051	AFP	alpha fetoprotein	-0.115167	0.690821	0.916055
ENSG00000081052	COL4A4	collagen type IV alpha 4 chain	0.179205	0.3683	0.766439
ENSG00000081059	TCF7	transcription factor 7	-0.335072	0.0373394	0.318131
ENSG00000081087	OSTM1	osteoclastogenesis associated transmembrane protein 1	0.0806725	0.478332	0.825065
ENSG00000081138	CDH7	cadherin 7	-0.116739	0.970034
ENSG00000081148	IMPG2	interphotoreceptor matrix proteoglycan 2	0.504732	0.782793
ENSG00000081154	PCNP	PEST proteolytic signal containing nuclear protein	0.0517367	0.63642	0.894989
ENSG00000081177	EXD2	exonuclease 3'-5' domain containing 2	0.112931	0.137252	0.553635
ENSG00000081181	ARG2	arginase 2	-0.932743	0.0219575	0.24934
ENSG00000081189	MEF2C	myocyte enhancer factor 2C	0.270165	0.0255733	0.269782
ENSG00000081237	PTPRC	protein tyrosine phosphatase, receptor type C	0.488151	0.0075099	0.139003
ENSG00000081248	CACNA1S	calcium voltage-gated channel subunit alpha1 S	-1.25635	0.306776
ENSG00000081277	PKP1	plakophilin 1	-0.264102
ENSG00000081307	UBA5	ubiquitin like modifier activating enzyme 5	0.0819157	0.215842	0.64864
ENSG00000081320	STK17B	serine/threonine kinase 17b	0.623991	0.00340576	0.0893435
ENSG00000081377	CDC14B	cell division cycle 14B	-0.224444	0.114147	0.522054
ENSG00000081386	ZNF510	zinc finger protein 510	-0.0417921	0.748728	0.936548
ENSG00000081479	LRP2	LDL receptor related protein 2	0.373629	0.482131	0.825452
ENSG00000081665	ZNF506	zinc finger protein 506	0.203956	0.26281	0.69079
ENSG00000081692	JMJD4	jumonji domain containing 4	0.0375325	0.782641	0.94661
ENSG00000081721	DUSP12	dual specificity phosphatase 12	-0.147966	0.271813	0.694734
ENSG00000081760	AACS	acetoacetyl-CoA synthetase	0.0336698	0.823528	0.959921
ENSG00000081791	DELE1	DAP3 binding cell death enhancer 1	0.0922117	0.265346	0.691173
ENSG00000081800	SLC13A1	solute carrier family 13 member 1
ENSG00000081803	CADPS2	calcium dependent secretion activator 2	0.136478	0.241566	0.671973
ENSG00000081818	PCDHB4	protocadherin beta 4	0.366897	0.41205	0.79203
ENSG00000081842	PCDHA6	protocadherin alpha 6	-0.270625	0.930605
ENSG00000081853	PCDHGA2	protocadherin gamma subfamily A, 2	0.508636	0.0680453	0.420532
ENSG00000081870	HSPB11	heat shock protein family B (small) member 11	0.127103	0.174516	0.604569
ENSG00000081913	PHLPP1	PH domain and leucine rich repeat protein phosphatase 1	-0.465227	0.000105262	0.00981502
ENSG00000081923	ATP8B1	ATPase phospholipid transporting 8B1	0.183661	0.164841	0.59214
ENSG00000081985	IL12RB2	interleukin 12 receptor subunit beta 2	0.0388985	0.888628	0.974669
ENSG00000082014	SMARCD3	SWI/SNF related, matrix associated, actin dependent regulator of chromatin, subfamily d, member 3	-0.14743	0.446527	0.808723
ENSG00000082068	WDR70	WD repeat domain 70	0.0415606	0.596073	0.881442
ENSG00000082074	FYB1	FYN binding protein 1	0.496805	0.0112468	0.173413
ENSG00000082126	MPP4	membrane palmitoylated protein 4	0.743671	0.810552
ENSG00000082146	STRADB	STE20 related adaptor beta	-0.239339	0.00713107	0.13467
ENSG00000082153	BZW1	basic leucine zipper and W2 domains 1	-0.00267484	0.975712	0.99587
ENSG00000082175	PGR	progesterone receptor	0.00247055	0.992831	0.99876
ENSG00000082196	C1QTNF3	C1q and TNF related 3	-0.0191074	0.952211	0.988865
ENSG00000082212	ME2	malic enzyme 2	0.236023	0.0136528	0.193637
ENSG00000082213	C5orf22	chromosome 5 open reading frame 22	-0.0330668	0.752371	0.937729
ENSG00000082258	CCNT2	cyclin T2	0.0668726	0.688581	0.915368
ENSG00000082269	FAM135A	family with sequence similarity 135 member A	0.0790645	0.679576	0.912992
ENSG00000082293	COL19A1	collagen type XIX alpha 1 chain	0.356049	0.753749
ENSG00000082397	EPB41L3	erythrocyte membrane protein band 4.1 like 3	0.276487	0.0353544	0.309205
ENSG00000082438	COBLL1	cordon-bleu WH2 repeat protein like 1	-0.240018	0.0475149	0.360739
ENSG00000082458	DLG3	discs large MAGUK scaffold protein 3	-0.120144	0.515186	0.840509
ENSG00000082482	KCNK2	potassium two pore domain channel subfamily K member 2	-1.20764	0.504033
ENSG00000082497	SERTAD4	SERTA domain containing 4	-1.54742	0.0699949
ENSG00000082512	TRAF5	TNF receptor associated factor 5	0.309292	0.205711	0.638804
ENSG00000082515	MRPL22	mitochondrial ribosomal protein L22	-0.0261276	0.763647	0.940761
ENSG00000082516	GEMIN5	gem nuclear organelle associated protein 5	-0.0253799	0.788081	0.949146
ENSG00000082556	OPRK1	opioid receptor kappa 1	-0.709194	0.422548
ENSG00000082641	NFE2L1	nuclear factor, erythroid 2 like 1	-0.1361	0.0674205	0.420054
ENSG00000082684	SEMA5B	semaphorin 5B	-0.084514	0.72823	0.930959
ENSG00000082701	GSK3B	glycogen synthase kinase 3 beta	0.00747435	0.897672	0.977334
ENSG00000082781	ITGB5	integrin subunit beta 5	-0.0779517	0.318178	0.730464
ENSG00000082805	ERC1	ELKS/RAB6-interacting/CAST family member 1	0.015024	0.823264	0.959921
ENSG00000082898	XPO1	exportin 1	0.148702	0.28848	0.710094
ENSG00000082996	RNF13	ring finger protein 13	-0.132295	0.138181	0.555281
ENSG00000083067	TRPM3	transient receptor potential cation channel subfamily M member 3	0.0123548	0.970819	0.994898
ENSG00000083093	PALB2	partner and localizer of BRCA2	0.11404	0.34892	0.753468
ENSG00000083097	DOP1A	DOP1 leucine zipper like protein A	0.02111	0.873091	0.970551
ENSG00000083099	LYRM2	LYR motif containing 2	0.1171	0.224404	0.654638
ENSG00000083123	BCKDHB	branched chain keto acid dehydrogenase E1 subunit beta	-0.061526	0.600269	0.883874
ENSG00000083168	KAT6A	lysine acetyltransferase 6A	0.0485881	0.473247	0.821138
ENSG00000083223	TUT7	terminal uridylyl transferase 7	-0.365548	0.0218587	0.248826
ENSG00000083290	ULK2	unc-51 like autophagy activating kinase 2	-0.189964	0.163058	0.590269
ENSG00000083307	GRHL2	grainyhead like transcription factor 2	-0.491035	0.325378	0.736742
ENSG00000083312	TNPO1	transportin 1	0.01579	0.855415	0.966126
ENSG00000083444	PLOD1	procollagen-lysine,2-oxoglutarate 5-dioxygenase 1	-0.0438873	0.639069	0.895826
ENSG00000083454	P2RX5	purinergic receptor P2X 5	0.0259988	0.956655
ENSG00000083457	ITGAE	integrin subunit alpha E	-0.0860192	0.596091	0.881442
ENSG00000083520	DIS3	DIS3 homolog, exosome endoribonuclease and 3'-5' exoribonuclease	0.0549139	0.653648	0.901948
ENSG00000083535	PIBF1	progesterone immunomodulatory binding factor 1	-0.00317222	0.985516	0.998031
ENSG00000083544	TDRD3	tudor domain containing 3	-0.109173	0.289835	0.711298
ENSG00000083635	NUFIP1	nuclear FMR1 interacting protein 1	-0.199431	0.0922278	0.480452
ENSG00000083642	PDS5B	PDS5 cohesin associated factor B	0.182029	0.277513	0.700611
ENSG00000083720	OXCT1	3-oxoacid CoA-transferase 1	0.0283944	0.906734	0.979441
ENSG00000083750	RRAGB	Ras related GTP binding B	-0.105882	0.399659	0.784705
ENSG00000083782	EPYC	epiphycan	-0.604475	0.845704
ENSG00000083799	CYLD	CYLD lysine 63 deubiquitinase	0.316512	0.0028149	0.0800097
ENSG00000083807	SLC27A5	solute carrier family 27 member 5	-0.394801	0.00134268	0.0516408
ENSG00000083812	ZNF324	zinc finger protein 324	0.53878	0.00236476	0.0717447
ENSG00000083814	ZNF671	zinc finger protein 671	0.357412	0.0597097	0.399738
ENSG00000083817	ZNF416	zinc finger protein 416	0.00981594	0.935604	0.985456
ENSG00000083828	ZNF586	zinc finger protein 586	0.257752	0.175139	0.604687
ENSG00000083838	ZNF446	zinc finger protein 446	0.250796	0.261623	0.68983
ENSG00000083844	ZNF264	zinc finger protein 264	0.0994194	0.503164	0.834911
ENSG00000083845	RPS5	ribosomal protein S5	-0.0829221	0.432504	0.802472
ENSG00000083857	FAT1	FAT atypical cadherin 1	0.336376	0.125978	0.539641
ENSG00000083896	YTHDC1	YTH domain containing 1	0.0596459	0.312027	0.726864
ENSG00000083937	CHMP2B	charged multivesicular body protein 2B	0.200027	0.0232369	0.257172
ENSG00000084070	SMAP2	small ArfGAP2	-0.16806	0.0859795	0.466601
ENSG00000084072	PPIE	peptidylprolyl isomerase E	-0.18109	0.0184268	0.230022
ENSG00000084073	ZMPSTE24	zinc metallopeptidase STE24	-0.0856791	0.232185	0.662069
ENSG00000084090	STARD7	StAR related lipid transfer domain containing 7	0.0639212	0.408407	0.79006
ENSG00000084092	NOA1	nitric oxide associated 1	-0.122828	0.132981	0.550216
ENSG00000084093	REST	RE1 silencing transcription factor	0.109916	0.445755	0.808596
ENSG00000084110	HAL	histidine ammonia-lyase	-0.566446	0.0116677	0.177679
ENSG00000084112	SSH1	slingshot protein phosphatase 1	0.00547024	0.948171	0.988226
ENSG00000084207	GSTP1	glutathione S-transferase pi 1	0.0819784	0.546207	0.855253
ENSG00000084234	APLP2	amyloid beta precursor like protein 2	-0.244244	0.000137203	0.0116049
ENSG00000084444	FAM234B	family with sequence similarity 234 member B	0.117034	0.469112	0.820031
ENSG00000084453	SLCO1A2	solute carrier organic anion transporter family member 1A2	-2.98458	1.9001e-06	0.000828683
ENSG00000084463	WBP11	WW domain binding protein 11	0.00685071	0.91375	0.981944
ENSG00000084623	EIF3I	eukaryotic translation initiation factor 3 subunit I	-0.147644	0.0998951	0.49844
ENSG00000084628	NKAIN1	sodium/potassium transporting ATPase interacting 1	0.229504	0.941128
ENSG00000084636	COL16A1	collagen type XVI alpha 1 chain	-0.119207	0.543954	0.853755
ENSG00000084652	TXLNA	taxilin alpha	0.271294	0.000187156	0.014246
ENSG00000084674	APOB	apolipoprotein B	-0.0378631	0.752961	0.937729
ENSG00000084676	NCOA1	nuclear receptor coactivator 1	0.121538	0.0573976	0.391295
ENSG00000084693	AGBL5	ATP/GTP binding protein like 5	-0.110125	0.223415	0.653392
ENSG00000084710	EFR3B	EFR3 homolog B	-0.0794957	0.791247	0.950231
ENSG00000084731	KIF3C	kinesin family member 3C	-0.0833178	0.695564	0.918034
ENSG00000084733	RAB10	RAB10, member RAS oncogene family	0.136321	0.0536336	0.381116
ENSG00000084734	GCKR	glucokinase regulator	-0.0268069	0.810807	0.955417
ENSG00000084754	HADHA	hydroxyacyl-CoA dehydrogenase trifunctional multienzyme complex subunit alpha	-0.102725	0.33979	0.747632
ENSG00000084764	MAPRE3	microtubule associated protein RP/EB family member 3	-0.0520931	0.666829	0.906072
ENSG00000084774	CAD	carbamoyl-phosphate synthetase 2, aspartate transcarbamylase, and dihydroorotase	-0.0717441	0.465209	0.818049
ENSG00000085063	CD59	CD59 molecule (CD59 blood group)	-0.0838431	0.252115	0.680828
ENSG00000085117	CD82	CD82 molecule	-0.257144	0.0652941	0.413333
ENSG00000085185	BCORL1	BCL6 corepressor like 1	-0.0200748	0.884973	0.974307
ENSG00000085224	ATRX	ATRX, chromatin remodeler	-0.025402	0.839348	0.963263
ENSG00000085231	AK6	adenylate kinase 6	-0.141113	0.161339	0.587745
ENSG00000085265	FCN1	ficolin 1	0.348704	0.34717	0.751879
ENSG00000085274	MYNN	myoneurin	-0.020333	0.842697	0.963571
ENSG00000085276	MECOM	MDS1 and EVI1 complex locus	-0.140899	0.581179	0.875343
ENSG00000085365	SCAMP1	secretory carrier membrane protein 1	-0.134302	0.206779	0.639018
ENSG00000085377	PREP	prolyl endopeptidase	0.067769	0.449441	0.810685
ENSG00000085382	HACE1	HECT domain and ankyrin repeat containing E3 ubiquitin protein ligase 1	0.109261	0.637486	0.894989
ENSG00000085415	SEH1L	SEH1 like nucleoporin	-0.086349	0.158074	0.584025
ENSG00000085433	WDR47	WD repeat domain 47	0.0164142	0.918476	0.982201
ENSG00000085449	WDFY1	WD repeat and FYVE domain containing 1	0.0909068	0.327866	0.739089
ENSG00000085465	OVGP1	oviductal glycoprotein 1	-0.379067	0.0334955	0.302875
ENSG00000085491	SLC25A24	solute carrier family 25 member 24	0.166257	0.423261	0.797329
ENSG00000085511	MAP3K4	mitogen-activated protein kinase kinase kinase 4	0.146462	0.138147	0.555281
ENSG00000085514	PILRA	paired immunoglobin like type 2 receptor alpha	0.181318	0.349976	0.753528
ENSG00000085552	IGSF9	immunoglobulin superfamily member 9	0.904323	9.37158e-05	0.00926464
ENSG00000085563	ABCB1	ATP binding cassette subfamily B member 1	-0.114675	0.176384	0.605564
ENSG00000085644	ZNF213	zinc finger protein 213	0.126604	0.387451	0.780044
ENSG00000085662	AKR1B1	aldo-keto reductase family 1 member B	0.126424	0.327555	0.738745
ENSG00000085719	CPNE3	copine 3	-0.109123	0.0839805	0.461248
ENSG00000085721	RRN3	RRN3 homolog, RNA polymerase I transcription factor	0.138184	0.161658	0.588372
ENSG00000085733	CTTN	cortactin	0.0957899	0.279907	0.703436
ENSG00000085741	WNT11	Wnt family member 11	0.730801	0.00856497	0.149043
ENSG00000085760	MTIF2	mitochondrial translational initiation factor 2	-0.0735687	0.370818	0.767558
ENSG00000085788	DDHD2	DDHD domain containing 2	0.187637	0.0995388	0.498015
ENSG00000085831	TTC39A	tetratricopeptide repeat domain 39A	0.0954498	0.796392	0.951767
ENSG00000085832	EPS15	epidermal growth factor receptor pathway substrate 15	0.0827295	0.510495	0.839061
ENSG00000085840	ORC1	origin recognition complex subunit 1	0.487543	0.22824	0.658262
ENSG00000085871	MGST2	microsomal glutathione S-transferase 2	-0.108875	0.246757	0.677448
ENSG00000085872	CHERP	calcium homeostasis endoplasmic reticulum protein	-0.0232716	0.793128	0.951119
ENSG00000085978	ATG16L1	autophagy related 16 like 1	-0.0382226	0.648599	0.89983
ENSG00000085982	USP40	ubiquitin specific peptidase 40	0.107019	0.186351	0.618065
ENSG00000085998	POMGNT1	protein O-linked mannose N-acetylglucosaminyltransferase 1 (beta 1,2-)	-0.0190777	0.859553	0.967803
ENSG00000085999	RAD54L	RAD54 like	-0.912867	0.286125
ENSG00000086015	MAST2	microtubule associated serine/threonine kinase 2	-0.118115	0.289397	0.711166
ENSG00000086061	DNAJA1	DnaJ heat shock protein family (Hsp40) member A1	0.213721	0.0448663	0.350787
ENSG00000086062	B4GALT1	beta-1,4-galactosyltransferase 1	0.0142646	0.893541	0.97563
ENSG00000086065	CHMP5	charged multivesicular body protein 5	0.0127864	0.883544	0.973955
ENSG00000086102	NFX1	nuclear transcription factor, X-box binding 1	-0.141347	0.0644193	0.411082
ENSG00000086159	AQP6	aquaporin 6	-0.350635	0.4375	0.803999
ENSG00000086189	DIMT1	DIM1 dimethyladenosine transferase 1 homolog	-0.00345718	0.970637	0.994898
ENSG00000086200	IPO11	importin 11	-0.0404321	0.715357	0.925333
ENSG00000086205	FOLH1	folate hydrolase 1	-0.0977093	0.430996	0.802472
ENSG00000086232	EIF2AK1	eukaryotic translation initiation factor 2 alpha kinase 1	-0.110324	0.0515208	0.374102
ENSG00000086288	NME8	NME/NM23 family member 8	0.885129	0.646689
ENSG00000086289	EPDR1	ependymin related 1	0.0656648	0.685526	0.913706
ENSG00000086300	SNX10	sorting nexin 10	0.186858	0.332593	0.742605
ENSG00000086475	SEPHS1	selenophosphate synthetase 1	-0.139972	0.0528553	0.378088
ENSG00000086504	MRPL28	mitochondrial ribosomal protein L28	0.0192076	0.887816	0.974581
ENSG00000086506	HBQ1	hemoglobin subunit theta 1	-0.820701	0.621711
ENSG00000086544	ITPKC	inositol-trisphosphate 3-kinase C	0.15711	0.199402	0.631989
ENSG00000086548	CEACAM6	carcinoembryonic antigen related cell adhesion molecule 6	1.36053	0.131611	0.548444
ENSG00000086570	FAT2	FAT atypical cadherin 2	-0.116739
ENSG00000086589	RBM22	RNA binding motif protein 22	-0.0998471	0.160815	0.586599
ENSG00000086598	TMED2	transmembrane p24 trafficking protein 2	0.148863	0.0608332	0.402528
ENSG00000086619	ERO1B	endoplasmic reticulum oxidoreductase 1 beta	0.0754583	0.579308	0.874786
ENSG00000086666	ZFAND6	zinc finger AN1-type containing 6	0.082093	0.261379	0.68983
ENSG00000086696	HSD17B2	hydroxysteroid 17-beta dehydrogenase 2	-0.446286	0.000146918	0.0121324
ENSG00000086712	TXLNG	taxilin gamma	-0.14101	0.19548	0.627228
ENSG00000086717	PPEF1	protein phosphatase with EF-hand domain 1	-0.975255	0.714757
ENSG00000086730	LAT2	linker for activation of T cells family member 2	0.303568	0.0335298	0.302875
ENSG00000086758	HUWE1	HECT, UBA and WWE domain containing 1, E3 ubiquitin protein ligase	0.0892432	0.245606	0.676032
ENSG00000086827	ZW10	zw10 kinetochore protein	-0.0992244	0.295626	0.715454
ENSG00000086848	ALG9	ALG9, alpha-1,2-mannosyltransferase	0.0800046	0.498119	0.83379
ENSG00000086967	MYBPC2	myosin binding protein C, fast type	-1.57973	0.32496	0.736609
ENSG00000086991	NOX4	NADPH oxidase 4	-0.0533724	0.934678
ENSG00000087008	ACOX3	acyl-CoA oxidase 3, pristanoyl	-0.0863186	0.333624	0.74283
ENSG00000087053	MTMR2	myotubularin related protein 2	0.171434	0.184277	0.615372
ENSG00000087074	PPP1R15A	protein phosphatase 1 regulatory subunit 15A	-0.0801705	0.444733	0.808059
ENSG00000087076	HSD17B14	hydroxysteroid 17-beta dehydrogenase 14	-0.446063	0.0650848	0.413062
ENSG00000087077	TRIP6	thyroid hormone receptor interactor 6	0.20047	0.162213	0.589345
ENSG00000087085	ACHE	acetylcholinesterase (Cartwright blood group)	0.32644	0.37525	0.770826
ENSG00000087086	FTL	ferritin light chain	-0.106234	0.329347	0.740551
ENSG00000087087	SRRT	serrate, RNA effector molecule	-0.0105348	0.903053	0.978884
ENSG00000087088	BAX	BCL2 associated X, apoptosis regulator	0.157298	0.314237	0.72862
ENSG00000087095	NLK	nemo like kinase	-0.046222	0.597504	0.882129
ENSG00000087111	PIGS	phosphatidylinositol glycan anchor biosynthesis class S	-0.11262	0.221006	0.650125
ENSG00000087116	ADAMTS2	ADAM metallopeptidase with thrombospondin type 1 motif 2	0.0198779	0.868292	0.969846
ENSG00000087128	TMPRSS11E	transmembrane serine protease 11E
ENSG00000087152	ATXN7L3	ataxin 7 like 3	0.035151	0.748183	0.936371
ENSG00000087157	PGS1	phosphatidylglycerophosphate synthase 1	0.129769	0.227229	0.657797
ENSG00000087191	PSMC5	proteasome 26S subunit, ATPase 5	-0.0165989	0.86529	0.969613
ENSG00000087206	UIMC1	ubiquitin interaction motif containing 1	-0.0166827	0.901685	0.978294
ENSG00000087237	CETP	cholesteryl ester transfer protein	0.00386528	0.982825	0.997111
ENSG00000087245	MMP2	matrix metallopeptidase 2	-0.292307	0.0467912	0.358014
ENSG00000087250	MT3	metallothionein 3	-0.0782668	0.979907
ENSG00000087253	LPCAT2	lysophosphatidylcholine acyltransferase 2	0.2167	0.17709	0.606777
ENSG00000087258	GNAO1	G protein subunit alpha o1	0.340433	0.0249362	0.26647
ENSG00000087263	OGFOD1	2-oxoglutarate and iron dependent oxygenase domain containing 1	0.0429991	0.652541	0.901224
ENSG00000087266	SH3BP2	SH3 domain binding protein 2	0.103781	0.302474	0.722216
ENSG00000087269	NOP14	NOP14 nucleolar protein	-0.228169	0.0102877	0.165029
ENSG00000087274	ADD1	adducin 1	-0.0874572	0.126099	0.539662
ENSG00000087299	L2HGDH	L-2-hydroxyglutarate dehydrogenase	-0.0222015	0.882007	0.973237
ENSG00000087301	TXNDC16	thioredoxin domain containing 16	-0.0872211	0.556204	0.860574
ENSG00000087302	RTRAF	RNA transcription, translation and transport factor	-0.111087	0.0957497	0.490919
ENSG00000087303	NID2	nidogen 2	-0.168128	0.434286	0.803369
ENSG00000087338	GMCL1	germ cell-less, spermatogenesis associated 1	-0.153055	0.26915	0.692716
ENSG00000087365	SF3B2	splicing factor 3b subunit 2	0.01047	0.886396	0.974581
ENSG00000087448	KLHL42	kelch like family member 42	-0.0302674	0.852799	0.965764
ENSG00000087460	GNAS	GNAS complex locus	0.0178145	0.784216	0.947003
ENSG00000087470	DNM1L	dynamin 1 like	0.244999	0.00392691	0.0977949
ENSG00000087494	PTHLH	parathyroid hormone like hormone	-1.17955	0.612265
ENSG00000087495	PHACTR3	phosphatase and actin regulator 3	-0.161826	0.592988	0.879836
ENSG00000087502	ERGIC2	ERGIC and golgi 2	-0.105153	0.239457	0.670384
ENSG00000087510	TFAP2C	transcription factor AP-2 gamma	-1.31062	0.624915
ENSG00000087586	AURKA	aurora kinase A	-0.380329	0.0238477	0.261061
ENSG00000087589	CASS4	Cas scaffold protein family member 4	-0.32286	0.257859	0.686337
ENSG00000087842	PIR	pirin	-0.155517	0.159837	0.585634
ENSG00000087884	AAMDC	adipogenesis associated Mth938 domain containing	-0.0204886	0.861504	0.968281
ENSG00000087903	RFX2	regulatory factor X2	0.0334747	0.865824	0.969754
ENSG00000087995	METTL2A	methyltransferase like 2A	0.0537841	0.463517	0.81698
ENSG00000088002	SULT2B1	sulfotransferase family 2B member 1	-0.442168	0.710087
ENSG00000088035	ALG6	ALG6, alpha-1,3-glucosyltransferase	0.0631396	0.541499	0.853146
ENSG00000088038	CNOT3	CCR4-NOT transcription complex subunit 3	-0.0855533	0.335904	0.744652
ENSG00000088053	GP6	glycoprotein VI platelet	-0.0343853	0.949383	0.988466
ENSG00000088179	PTPN4	protein tyrosine phosphatase, non-receptor type 4	0.148	0.259019	0.687367
ENSG00000088205	DDX18	DEAD-box helicase 18	-0.0645722	0.32865	0.739541
ENSG00000088247	KHSRP	KH-type splicing regulatory protein	-0.177722	0.0376062	0.319047
ENSG00000088256	GNA11	G protein subunit alpha 11	0.0321453	0.769	0.942341
ENSG00000088280	ASAP3	ArfGAP with SH3 domain, ankyrin repeat and PH domain 3	0.0950185	0.623332	0.890128
ENSG00000088298	EDEM2	ER degradation enhancing alpha-mannosidase like protein 2	-0.0483377	0.596457	0.881617
ENSG00000088305	DNMT3B	DNA methyltransferase 3 beta	0.533072	0.0755931	0.440492
ENSG00000088320	REM1	RRAD and GEM like GTPase 1	-0.223754	0.572964	0.869729
ENSG00000088325	TPX2	TPX2, microtubule nucleation factor	0.551991	0.0559159	0.388241
ENSG00000088356	PDRG1	p53 and DNA damage regulated 1	0.133734	0.349797	0.753528
ENSG00000088367	EPB41L1	erythrocyte membrane protein band 4.1 like 1	-0.583696	0.00667825	0.130809
ENSG00000088386	SLC15A1	solute carrier family 15 member 1	0.241822	0.111552	0.518376
ENSG00000088387	DOCK9	dedicator of cytokinesis 9	0.319475	0.00090187	0.0405032
ENSG00000088448	ANKRD10	ankyrin repeat domain 10	0.0125362	0.927892	0.985214
ENSG00000088451	TGDS	TDP-glucose 4,6-dehydratase	-0.164291	0.436531	0.803406
ENSG00000088538	DOCK3	dedicator of cytokinesis 3	0.670987	0.760649
ENSG00000088543	C3orf18	chromosome 3 open reading frame 18	-0.0953899	0.539315	0.852084
ENSG00000088682	COQ9	coenzyme Q9	-0.188184	0.0267306	0.273451
ENSG00000088726	TMEM40	transmembrane protein 40	0.0212456	0.989819
ENSG00000088727	KIF9	kinesin family member 9	0.13144	0.457534	0.81427
ENSG00000088756	ARHGAP28	Rho GTPase activating protein 28	0.184354	0.536374	0.850434
ENSG00000088766	CRLS1	cardiolipin synthase 1	-0.0681761	0.305332	0.72276
ENSG00000088782	DEFB127	defensin beta 127
ENSG00000088808	PPP1R13B	protein phosphatase 1 regulatory subunit 13B	-0.138882	0.153858	0.579084
ENSG00000088812	ATRN	attractin	0.0286381	0.723454	0.928894
ENSG00000088826	SMOX	spermine oxidase	-0.121559	0.583637	0.876459
ENSG00000088827	SIGLEC1	sialic acid binding Ig like lectin 1	0.237719	0.10012	0.499206
ENSG00000088832	FKBP1A	FKBP prolyl isomerase 1A	0.0328475	0.684383	0.913467
ENSG00000088833	NSFL1C	NSFL1 cofactor	0.00326126	0.97182	0.995007
ENSG00000088836	SLC4A11	solute carrier family 4 member 11	0.352194	0.600201
ENSG00000088854	C20orf194	chromosome 20 open reading frame 194	0.0431317	0.715329	0.925333
ENSG00000088876	ZNF343	zinc finger protein 343	-0.104527	0.385926	0.778997
ENSG00000088881	EBF4	EBF family member 4	-0.280154	0.0573919	0.391295
ENSG00000088882	CPXM1	carboxypeptidase X, M14 family member 1	-0.994717	0.253284
ENSG00000088888	MAVS	mitochondrial antiviral signaling protein	-0.0597198	0.395546	0.782608
ENSG00000088899	LZTS3	leucine zipper tumor suppressor family member 3	-0.255072	0.0712136	0.428756
ENSG00000088926	F11	coagulation factor XI	-0.309489	0.00110567	0.0461999
ENSG00000088930	XRN2	5'-3' exoribonuclease 2	0.0147079	0.873458	0.970551
ENSG00000088970	KIZ	kizuna centrosomal protein	-0.265315	0.00670168	0.130809
ENSG00000088986	DYNLL1	dynein light chain LC8-type 1	0.136105	0.167459	0.596036
ENSG00000088992	TESC	tescalcin	-0.228552	0.402805	0.786561
ENSG00000089006	SNX5	sorting nexin 5	-0.127152	0.0608568	0.402528
ENSG00000089009	RPL6	ribosomal protein L6	0.0113959	0.872408	0.970551
ENSG00000089012	SIRPG	signal regulatory protein gamma	-0.265332	0.454397	0.813206
ENSG00000089022	MAPKAPK5	mitogen-activated protein kinase-activated protein kinase 5	-0.134319	0.0749193	0.438764
ENSG00000089041	P2RX7	purinergic receptor P2X 7	-0.091239	0.563217	0.864529
ENSG00000089048	ESF1	ESF1 nucleolar pre-rRNA processing protein homolog	0.0542512	0.679971	0.913039
ENSG00000089050	RBBP9	RB binding protein 9, serine hydrolase	0.363978	0.000515977	0.0289633
ENSG00000089053	ANAPC5	anaphase promoting complex subunit 5	0.0172414	0.783221	0.946829
ENSG00000089057	SLC23A2	solute carrier family 23 member 2	-0.46631	0.00109173	0.0460308
ENSG00000089060	SLC8B1	solute carrier family 8 member B1	-0.00569425	0.957124	0.990407
ENSG00000089063	TMEM230	transmembrane protein 230	0.0111402	0.872958	0.970551
ENSG00000089091	DZANK1	double zinc ribbon and ankyrin repeat domains 1	0.0910655	0.762961	0.940682
ENSG00000089094	KDM2B	lysine demethylase 2B	-0.0355179	0.777254	0.944867
ENSG00000089101	CFAP61	cilia and flagella associated protein 61	1.17498	0.681432
ENSG00000089116	LHX5	LIM homeobox 5
ENSG00000089123	TASP1	taspase 1	0.228117	0.0894314	0.474109
ENSG00000089127	OAS1	2'-5'-oligoadenylate synthetase 1	0.359514	0.0237256	0.260235
ENSG00000089154	GCN1	GCN1, eIF2 alpha kinase activator homolog	0.0205994	0.748782	0.936548
ENSG00000089157	RPLP0	ribosomal protein lateral stalk subunit P0	-0.0611315	0.512861	0.839786
ENSG00000089159	PXN	paxillin	-0.0281151	0.674354	0.910529
ENSG00000089163	SIRT4	sirtuin 4	-0.0519878	0.785843	0.947575
ENSG00000089169	RPH3A	rabphilin 3A	0.492819	0.55694
ENSG00000089177	KIF16B	kinesin family member 16B	-0.131155	0.411747	0.79203
ENSG00000089195	TRMT6	tRNA methyltransferase 6	0.115431	0.396791	0.783076
ENSG00000089199	CHGB	chromogranin B	0.0756186	0.980587
ENSG00000089220	PEBP1	phosphatidylethanolamine binding protein 1	-0.156778	0.0575239	0.391295
ENSG00000089225	TBX5	T-box 5
ENSG00000089234	BRAP	BRCA1 associated protein	-0.101186	0.170875	0.599781
ENSG00000089248	ERP29	endoplasmic reticulum protein 29	-0.0782034	0.388898	0.780544
ENSG00000089250	NOS1	nitric oxide synthase 1	-0.0572931	0.906011	0.979399
ENSG00000089280	FUS	FUS RNA binding protein	0.183913	0.118959	0.529849
ENSG00000089289	IGBP1	immunoglobulin binding protein 1	-0.138888	0.159466	0.584662
ENSG00000089327	FXYD5	FXYD domain containing ion transport regulator 5	0.0804001	0.628315	0.893015
ENSG00000089335	ZNF302	zinc finger protein 302	-0.000741618	0.995706	0.998819
ENSG00000089351	GRAMD1A	GRAM domain containing 1A	0.127629	0.389504	0.780544
ENSG00000089356	FXYD3	FXYD domain containing ion transport regulator 3	-0.753288	0.263036	0.690922
ENSG00000089472	HEPH	hephaestin	-0.0882787	0.621898	0.889368
ENSG00000089486	CDIP1	cell death inducing p53 target 1	0.013878	0.899095	0.977763
ENSG00000089505	CMTM1	CKLF like MARVEL transmembrane domain containing 1	0.395075	0.459439
ENSG00000089558	KCNH4	potassium voltage-gated channel subfamily H member 4	0.964254	0.374864
ENSG00000089597	GANAB	glucosidase II alpha subunit	-0.0110175	0.89778	0.977334
ENSG00000089639	GMIP	GEM interacting protein	0.168823	0.218216	0.649726
ENSG00000089682	RBM41	RNA binding motif protein 41	0.0784465	0.550195	0.857283
ENSG00000089685	BIRC5	baculoviral IAP repeat containing 5	0.143108	0.707785	0.922778
ENSG00000089692	LAG3	lymphocyte activating 3	0.114824	0.627648	0.89282
ENSG00000089693	MLF2	myeloid leukemia factor 2	0.0187646	0.854736	0.966126
ENSG00000089723	OTUB2	OTU deubiquitinase, ubiquitin aldehyde binding 2	0.326245	0.201498	0.635216
ENSG00000089737	DDX24	DEAD-box helicase 24	-0.0617692	0.472896	0.821138
ENSG00000089775	ZBTB25	zinc finger and BTB domain containing 25	0.0440681	0.836766	0.962888
ENSG00000089818	NECAP1	NECAP endocytosis associated 1	0.0636397	0.522887	0.844458
ENSG00000089820	ARHGAP4	Rho GTPase activating protein 4	0.0474331	0.780555	0.945938
ENSG00000089847	ANKRD24	ankyrin repeat domain 24	-0.103021	0.488673	0.828761
ENSG00000089876	DHX32	DEAH-box helicase 32 (putative)	-0.0688683	0.354113	0.756
ENSG00000089902	RCOR1	REST corepressor 1	0.219226	0.0139271	0.195539
ENSG00000089916	GPATCH2L	G-patch domain containing 2 like	0.0447478	0.711004	0.923712
ENSG00000090006	LTBP4	latent transforming growth factor beta binding protein 4	-0.291796	0.0967561	0.492803
ENSG00000090013	BLVRB	biliverdin reductase B	-0.378279	0.00105559	0.0449142
ENSG00000090020	SLC9A1	solute carrier family 9 member A1	0.0469459	0.688176	0.915207
ENSG00000090054	SPTLC1	serine palmitoyltransferase long chain base subunit 1	-0.0577442	0.47191	0.821138
ENSG00000090060	PAPOLA	poly(A) polymerase alpha	-0.0433996	0.657379	0.903435
ENSG00000090061	CCNK	cyclin K	0.0243906	0.734124	0.932506
ENSG00000090097	PCBP4	poly(rC) binding protein 4	0.117818	0.436759	0.803508
ENSG00000090104	RGS1	regulator of G protein signaling 1	0.544348	0.0677189	0.420458
ENSG00000090238	YPEL3	yippee like 3	-0.372417	0.0112218	0.173282
ENSG00000090263	MRPS33	mitochondrial ribosomal protein S33	0.0683359	0.412477	0.79203
ENSG00000090266	NDUFB2	NADH:ubiquinone oxidoreductase subunit B2	0.072743	0.485935	0.827601
ENSG00000090273	NUDC	nuclear distribution C, dynein complex regulator	-0.130171	0.149281	0.571026
ENSG00000090316	MAEA	macrophage erythroblast attacher	0.0126635	0.842612	0.963571
ENSG00000090339	ICAM1	intercellular adhesion molecule 1	0.184742	0.215699	0.64864
ENSG00000090372	STRN4	striatin 4	-0.0259607	0.802235	0.952569
ENSG00000090376	IRAK3	interleukin 1 receptor associated kinase 3	-0.134928	0.423977	0.797602
ENSG00000090382	LYZ	lysozyme	0.597851	0.0275282	0.277047
ENSG00000090402	SI	sucrase-isomaltase	0.0881752
ENSG00000090432	MUL1	mitochondrial E3 ubiquitin protein ligase 1	-0.0427464	0.736657	0.932525
ENSG00000090447	TFAP4	transcription factor AP-4	-0.355493	0.0262706	0.272555
ENSG00000090470	PDCD7	programmed cell death 7	0.0769621	0.488852	0.828868
ENSG00000090487	SPG21	SPG21, maspardin	-0.0736747	0.332933	0.742605
ENSG00000090512	FETUB	fetuin B	0.0798106	0.548021	0.856362
ENSG00000090520	DNAJB11	DnaJ heat shock protein family (Hsp40) member B11	0.29971	0.0188377	0.232243
ENSG00000090530	P3H2	prolyl 3-hydroxylase 2	-0.160248	0.14192	0.561366
ENSG00000090534	THPO	thrombopoietin	-0.139242	0.240691	0.671415
ENSG00000090539	CHRD	chordin	0.0562691	0.785299	0.947327
ENSG00000090554	FLT3LG	fms related tyrosine kinase 3 ligand	0.0932226	0.965169
ENSG00000090565	RAB11FIP3	RAB11 family interacting protein 3	0.0675038	0.443679	0.80725
ENSG00000090581	GNPTG	N-acetylglucosamine-1-phosphate transferase subunit gamma	-0.0910806	0.310604	0.726207
ENSG00000090612	ZNF268	zinc finger protein 268	-0.0190929	0.880752	0.972876
ENSG00000090615	GOLGA3	golgin A3	0.252388	0.00782947	0.141584
ENSG00000090621	PABPC4	poly(A) binding protein cytoplasmic 4	-0.227048	0.00308673	0.0839735
ENSG00000090659	CD209	CD209 molecule	-0.0780752	0.815775	0.957363
ENSG00000090661	CERS4	ceramide synthase 4	-0.00378909	0.9805	0.996853
ENSG00000090674	MCOLN1	mucolipin 1	-0.0339119	0.783309	0.946829
ENSG00000090686	USP48	ubiquitin specific peptidase 48	0.149368	0.0420594	0.339604
ENSG00000090776	EFNB1	ephrin B1	-0.0979227	0.394983	0.782608
ENSG00000090857	PDPR	pyruvate dehydrogenase phosphatase regulatory subunit	-0.103486	0.521225	0.843779
ENSG00000090861	AARS	alanyl-tRNA synthetase	-0.112469	0.326793	0.738255
ENSG00000090863	GLG1	golgi glycoprotein 1	-0.0336436	0.619823	0.889076
ENSG00000090889	KIF4A	kinesin family member 4A	0.354306	0.482053	0.825452
ENSG00000090905	TNRC6A	trinucleotide repeat containing 6A	0.0656749	0.653303	0.901651
ENSG00000090924	PLEKHG2	pleckstrin homology and RhoGEF domain containing G2	-0.0455607	0.728799	0.931127
ENSG00000090932	DLL3	delta like canonical Notch ligand 3	0.229504	0.941128
ENSG00000090971	NAT14	N-acetyltransferase 14 (putative)	-0.359083	0.136831	0.553635
ENSG00000090975	PITPNM2	phosphatidylinositol transfer protein membrane associated 2	0.482575	0.000178252	0.0141346
ENSG00000090989	EXOC1	exocyst complex component 1	0.0389992	0.758668	0.940464
ENSG00000091009	RBM27	RNA binding motif protein 27	-0.0461067	0.650414	0.900692
ENSG00000091010	POU4F3	POU class 4 homeobox 3	-0.270625	0.930605
ENSG00000091039	OSBPL8	oxysterol binding protein like 8	0.114287	0.515953	0.840873
ENSG00000091073	DTX2	deltex E3 ubiquitin ligase 2	0.211479	0.195543	0.627228
ENSG00000091106	NLRC4	NLR family CARD domain containing 4	0.27991	0.182993	0.615049
ENSG00000091127	PUS7	pseudouridine synthase 7	0.0130659	0.92485	0.984231
ENSG00000091128	LAMB4	laminin subunit beta 4	0.101816	0.917465
ENSG00000091129	NRCAM	neuronal cell adhesion molecule	1.90266	4.05947e-05	0.00529476
ENSG00000091136	LAMB1	laminin subunit beta 1	-0.360721	0.0439538	0.346657
ENSG00000091137	SLC26A4	solute carrier family 26 member 4	-0.363082	0.562174
ENSG00000091138	SLC26A3	solute carrier family 26 member 3	-1.12907	0.0289701	0.282902
ENSG00000091140	DLD	dihydrolipoamide dehydrogenase	0.15551	0.0361748	0.313575
ENSG00000091157	WDR7	WD repeat domain 7	0.182574	0.0535784	0.380917
ENSG00000091164	TXNL1	thioredoxin like 1	-0.0592375	0.314402	0.72862
ENSG00000091181	IL5RA	interleukin 5 receptor subunit alpha	-0.939079	0.143399
ENSG00000091262	ABCC6	ATP binding cassette subfamily C member 6	0.110538	0.323897	0.735128
ENSG00000091317	CMTM6	CKLF like MARVEL transmembrane domain containing 6	0.0432211	0.513335	0.839786
ENSG00000091409	ITGA6	integrin subunit alpha 6	0.509201	0.00251751	0.0753955
ENSG00000091428	RAPGEF4	Rap guanine nucleotide exchange factor 4	-0.247136	0.0846856	0.462572
ENSG00000091436	MAP3K20	mitogen-activated protein kinase kinase kinase 20	-0.32021	0.0154046	0.206817
ENSG00000091482	SMPX	small muscle protein X-linked	-1.39762	0.440878
ENSG00000091483	FH	fumarate hydratase	-0.194505	0.0107047	0.168944
ENSG00000091490	SEL1L3	SEL1L family member 3	0.13925	0.316076	0.729422
ENSG00000091513	TF	transferrin	-0.152865	0.114946	0.52397
ENSG00000091527	CDV3	CDV3 homolog	-0.0281415	0.761323	0.940682
ENSG00000091536	MYO15A	myosin XVA	0.786399	0.190652	0.622112
ENSG00000091542	ALKBH5	alkB homolog 5, RNA demethylase	-0.106828	0.167825	0.596571
ENSG00000091583	APOH	apolipoprotein H	-0.156944	0.0460574	0.355715
ENSG00000091592	NLRP1	NLR family pyrin domain containing 1	0.1954	0.230061	0.660019
ENSG00000091622	PITPNM3	PITPNM family member 3	-0.32708	0.0954435	0.49007
ENSG00000091640	SPAG7	sperm associated antigen 7	-0.137255	0.135319	0.553051
ENSG00000091651	ORC6	origin recognition complex subunit 6	0.705184	0.311776
ENSG00000091656	ZFHX4	zinc finger homeobox 4	-0.0346521	0.809012	0.955094
ENSG00000091664	SLC17A6	solute carrier family 17 member 6
ENSG00000091704	CPA1	carboxypeptidase A1	0.266337	0.885594
ENSG00000091732	ZC3HC1	zinc finger C3HC-type containing 1	-0.0750454	0.360097	0.760405
ENSG00000091831	ESR1	estrogen receptor 1	-0.0539378	0.68452	0.913467
ENSG00000091844	RGS17	regulator of G protein signaling 17	1.16659	0.52395
ENSG00000091879	ANGPT2	angiopoietin 2	-0.378572	0.176644	0.605883
ENSG00000091947	TMEM101	transmembrane protein 101	-0.198931	0.0649077	0.412313
ENSG00000091972	CD200	CD200 molecule	-0.204759	0.711882	0.923846
ENSG00000091986	CCDC80	coiled-coil domain containing 80	0.287913	0.186806	0.618961
ENSG00000092009	CMA1	chymase 1	0.994839	0.0785122
ENSG00000092010	PSME1	proteasome activator subunit 1	0.0274162	0.784607	0.947135
ENSG00000092020	PPP2R3C	protein phosphatase 2 regulatory subunit B''gamma	0.0389876	0.730235	0.931439
ENSG00000092036	HAUS4	HAUS augmin like complex subunit 4	-0.448853	0.00221069	0.0693311
ENSG00000092051	JPH4	junctophilin 4	0.889111	0.0438268	0.34615
ENSG00000092054	MYH7	myosin heavy chain 7	0.372261	0.803065	0.952569
ENSG00000092067	CEBPE	CCAAT enhancer binding protein epsilon	0.743244	0.431994
ENSG00000092068	SLC7A8	solute carrier family 7 member 8	0.118083	0.419603	0.795757
ENSG00000092094	OSGEP	O-sialoglycoprotein endopeptidase	0.0418722	0.676101	0.911483
ENSG00000092096	SLC22A17	solute carrier family 22 member 17	0.0791533	0.64057	0.896122
ENSG00000092098	RNF31	ring finger protein 31	0.00352973	0.97663	0.99587
ENSG00000092108	SCFD1	sec1 family domain containing 1	0.103517	0.189463	0.621129
ENSG00000092140	G2E3	G2/M-phase specific E3 ubiquitin protein ligase	0.133314	0.506636	0.83656
ENSG00000092148	HECTD1	HECT domain E3 ubiquitin protein ligase 1	0.0301116	0.81234	0.955984
ENSG00000092199	HNRNPC	heterogeneous nuclear ribonucleoprotein C (C1/C2)	-0.0253096	0.628419	0.893015
ENSG00000092200	RPGRIP1	RPGR interacting protein 1	0.0137588	0.967353	0.993338
ENSG00000092201	SUPT16H	SPT16 homolog, facilitates chromatin remodeling subunit	0.00672393	0.914204	0.981944
ENSG00000092203	TOX4	TOX high mobility group box family member 4	-0.0305324	0.659591	0.904427
ENSG00000092208	GEMIN2	gem nuclear organelle associated protein 2	-0.0998856	0.522875	0.844458
ENSG00000092295	TGM1	transglutaminase 1	-1.20782	0.110486
ENSG00000092330	TINF2	TERF1 interacting nuclear factor 2	0.0273089	0.689346	0.915368
ENSG00000092345	DAZL	deleted in azoospermia like	1.45461	0.592884
ENSG00000092377	TBL1Y	transducin beta like 1 Y-linked	0.263101	0.429148	0.800694
ENSG00000092421	SEMA6A	semaphorin 6A	0.133639	0.138557	0.555356
ENSG00000092439	TRPM7	transient receptor potential cation channel subfamily M member 7	0.17334	0.367299	0.766268
ENSG00000092445	TYRO3	TYRO3 protein tyrosine kinase	-0.281329	0.0923961	0.480686
ENSG00000092470	WDR76	WD repeat domain 76	0.249177	0.273536	0.69605
ENSG00000092529	CAPN3	calpain 3	0.554127	0.556707
ENSG00000092531	SNAP23	synaptosome associated protein 23	-0.111935	0.219024	0.649874
ENSG00000092607	TBX15	T-box 15	0.0698478	0.711067	0.923712
ENSG00000092621	PHGDH	phosphoglycerate dehydrogenase	-0.319786	0.0336962	0.303592
ENSG00000092758	COL9A3	collagen type IX alpha 3 chain	0.0538542	0.851271	0.965764
ENSG00000092820	EZR	ezrin	-0.0179915	0.896871	0.977301
ENSG00000092841	MYL6	myosin light chain 6	0.135676	0.232815	0.66296
ENSG00000092847	AGO1	argonaute RISC catalytic component 1	0.0119989	0.866773	0.969773
ENSG00000092850	TEKT2	tektin 2	0.279431	0.901252
ENSG00000092853	CLSPN	claspin	0.788301	0.080868	0.455054
ENSG00000092871	RFFL	ring finger and FYVE like domain containing E3 ubiquitin protein ligase	-0.0457169	0.715482	0.925333
ENSG00000092929	UNC13D	unc-13 homolog D	0.0651896	0.682291	0.913211
ENSG00000092931	MFSD11	major facilitator superfamily domain containing 11	0.161525	0.0529153	0.378323
ENSG00000092964	DPYSL2	dihydropyrimidinase like 2	0.379943	0.00213414	0.0684571
ENSG00000092969	TGFB2	transforming growth factor beta 2	-0.170988	0.622567	0.889764
ENSG00000092978	GPATCH2	G-patch domain containing 2	0.269283	0.086636	0.467292
ENSG00000093000	NUP50	nucleoporin 50	0.0349094	0.744149	0.935287
ENSG00000093009	CDC45	cell division cycle 45	0.397745	0.549352	0.856526
ENSG00000093010	COMT	catechol-O-methyltransferase	-0.0537295	0.687114	0.914666
ENSG00000093072	ADA2	adenosine deaminase 2	0.149422	0.405966	0.789119
ENSG00000093134	VNN3	vanin 3	-0.0397233	0.869829	0.970137
ENSG00000093144	ECHDC1	ethylmalonyl-CoA decarboxylase 1	0.176494	0.128412	0.54355
ENSG00000093167	LRRFIP2	LRR binding FLII interacting protein 2	-0.0943418	0.227762	0.657882
ENSG00000093183	SEC22C	SEC22 homolog C, vesicle trafficking protein	-0.102583	0.163757	0.591182
ENSG00000093217	XYLB	xylulokinase	-0.0979648	0.228686	0.658356
ENSG00000094631	HDAC6	histone deacetylase 6	-0.117914	0.167207	0.595674
ENSG00000094661	OR1I1	olfactory receptor family 1 subfamily I member 1
ENSG00000094755	GABRP	gamma-aminobutyric acid type A receptor pi subunit	-0.508486	0.247788	0.678198
ENSG00000094796	KRT31	keratin 31	0.537276	0.862738
ENSG00000094804	CDC6	cell division cycle 6	0.965933	0.0233076	0.257707
ENSG00000094841	UPRT	uracil phosphoribosyltransferase homolog	0.153485	0.141294	0.561049
ENSG00000094880	CDC23	cell division cycle 23	0.0628715	0.344756	0.750967
ENSG00000094914	AAAS	aladin WD repeat nucleoporin	0.0581398	0.57799	0.873652
ENSG00000094916	CBX5	chromobox 5	0.127712	0.159484	0.584662
[truncated: 17,787 more rows]
